# Supplementary material for: Fat Induces Glucose Metabolism in Nontransformed Liver Cells and Promotes Liver Tumorigenesis
Source: Oxford University Press journal article supplement (doi:10.1158/0008-5472.can-20-1954), 2021-03-09
Supplement: 00085472can201954-sup-244918_2_supp_6950957_qp5ddv.xlsx [file 00085472can201954-sup-244918_2_supp_6950957_qp5ddv.xlsx]

## Sheet: table S1
Animal Food - Dietary composition
	Control diet		high fat diet
Gross energy (Mj/kg)	18.4		25
Metabolizable energy (Mj/kg)	15.2		21.6
Fat (Kj/%)	13		60
Protein (Kj/%)	27		20
Carbohydrates (Kj/%)	60		20
Crude protein (Nx6.25) (%)	24.4		24.4
Crude fat (%)	5.2		34.6
crude fibre - NDF (%)	5.2		5.2
crude fibre - ADF (%)	1.9		1.9
crude ash (%)	5.5		5.3
Starch (%)	28.9		0.1
Sugar (%)	8		9.4
N-free extracts (%)	54.6		26.3
Minerals (%)
Calcium	0.92		0.92
Phopshorus	0.64		0.64
Ca/P	1.44:1		1.44:1
Sodium	0.2		0.2
Magnesium	0.23		0.23
Potassium	0.97		0.97
Fatty acids (%)
C12:0	0.01		0.07
C14:0	0.02		0.44
C16:0	0.58		7.93
C18:0	0.19		4.37
C20:0	0.02		0.11
C16:1	0.01		0.94
C18:1	1.29		13.97
C18:2	2.65		4.64
C18:3	0.29		0.49
Amino Acids (%)
Lysine	2.02		2.02
Methionine	0.86		0.86
Cystine	0.45		0.45
Met+Cys	1.31		1.31
Threonine	1.07		1.07
Tryptophan	0.33		0.33
Arginine	0.95		0.95
Hisitidne	0.74		0.74
Valine	1.7		1.7
Isoleucine	1.38		1.38
Leucine	2.42		2.42
Phenylalanine	1.27		1.27
Phe+Tyr	2.56		2.56
Glycine	0.52		0.52
Glutamic acid	5.5		5.5
Aspartic acid	1.82		1.82
Proline	2.8		2.8
Serine	1.46		1.46
Alanine	0.81		0.81
Vitamins (per kg)
Vitamin A (IU)	15000		15000
Vitamin D3 (IU)	1500		1500
Vitamin E (mg)	150		150
Vitamin K (as MNB) (mg)	20		20
Thiamine (B1) (mg)	25		25
Riboflavin (B2) (mg)	16		16
Pyridoxine (B6) (mg)	16		16
Cobalamin (B12) (µg)	30		30
Nicotinic Acid (mg)	47		47
Panthothenic acid (mg)	55		55
Folic acid (mg)	16		16
Biotin (µg)	300		300
Choline (mg)	920		920
Trace Elements (mg per kg)
Iron	168		168
Manganese	95		95
Zinc	65		65
Copper	13		13
Iodine	1.2		1.2
Selenium	0.2		0.2
Feed composition (%)
Casein	27.7		27.7
Corn Starch	30		N.A.
Maltodextrin	16.65		15.6
Sucrose	7		8.46
Cellulose powder	6		6
L-Cystine	0.35		0.35
Vitamin premix	1		1
Mineral and trace element premix	6		6
Choline Chloride (50% choline)	0.25		0.25
Dye	0.04 (yellow)		0.03 (blue)
Butylated Hydroxytoluene	0.01		0.01
Pork Lard	N.A.		31.5
Soybean oil	3.1		3.1

## Sheet: table S2
Hepatic metabolite 13C-enrichment from infused glucose, standardized to blood glucose enrichment
	% of Metabolites with 13C-Enrichment								Results of 2-Way ANOVA Testing
	8-weeks Control diet				8-weeks High-fat diet
	Vehicle		DEN		Vehicle		DEN		interaction			diet			DEN
	Average	STDev	Average	STDev	Average	STDev	Average	STDev	eta2	F (DFn, DFd)	P value	eta2	F (DFn, DFd)	P value	eta2	F (DFn, DFd)	P value
6-phosphogluconate	61.53	1.61	66.03	22.3	79.4	8.9	81.98	4.81	0.1142	F (1, 16) = 0.02869	0.8676	35.88	F (1, 16) = 9.016	0.0084	1.571	F (1, 16) = 0.3948	0.5386
AKG	15.636	3.36453	15.932	3.39212	17.3883	2.86031	17.634	6.29	0.001078	F (1, 17) = 0.0001932	0.9891	5.076	F (1, 17) = 0.9099	0.3535	0.1248	F (1, 17) = 0.02237	0.8829
alanine	60.64	3.22	61.5	12.69	74.5	4.08	73.35	5.14	0.3052	F (1, 17) = 0.1040	0.7511	49.19	F (1, 17) = 16.76	0.0008	0.006389	F (1, 17) = 0.002177	0.9633
aspartate	21.284	2.9821	20.882	4.24037	18.516	2.92076	24.68	3.20754	19.7	F (1, 15) = 4.411	0.053	0.4848	F (1, 15) = 0.1085	0.7464	15.17	F (1, 15) = 3.397	0.0852
citrate	23.178	2.95286	24.81	5.3699	25.7117	3.2923	28.888	2.5699	0.9802	F (1, 17) = 0.2291	0.6383	17.97	F (1, 17) = 4.199	0.0562	9.502	F (1, 17) = 2.221	0.1545
Dehydroxyacetone phosphate	60.5104	3.23512	62.7401	16.7311	80.2731	6.58819	80.6	9.44276	0.1313	F (1, 17) = 0.04628	0.8322	51.3	F (1, 17) = 18.08	0.0005	0.2369	F (1, 17) = 0.08351	0.7761
fructoses-bisphosphate	62.24	4.71	70.28	16.73	80.93	6.87	84.49	7.26	0.8043	F (1, 17) = 0.2678	0.6115	43.58	F (1, 17) = 14.51	0.0014	5.417	F (1, 17) = 1.804	0.1969
fumarate	28.82	4.26	30.38	4.89	34.21	8.29	34.42	1.34	0.3707	F (1, 17) = 0.0779	0.7835	18.13	F (1, 17) = 3.811	0.0676	0.6401	F (1, 17) = 0.1345	0.7183
glycerol-3-phosphate	59.304	3.51334	56.848	15.3395	76.035	5.09783	74.454	6.42167	0.03461	F (1, 17) = 0.01312	0.9102	53.71	F (1, 17) = 20.35	0.0003	0.7445	F (1, 17) = 0.2821	0.6022
glycine	4.28263	0.741774	4.36966	0.612844	5.10028	0.862882	4.8936	0.989621	0.7975	F (1, 17) = 0.1661	0.6887	16.89	F (1, 17) = 3.52	0.0779	0.1347	F (1, 17) = 0.02806	0.8689
hexose-phosphates	60.9912	1.41589	67.006	15.4539	79.3469	5.62003	84.801	6.26827	0.01326	F (1, 17) = 0.005491	0.9418	54.73	F (1, 17) = 22.67	0.0002	5.509	F (1, 17) = 2.282	0.1493
lactate	61.0497	3.35342	62.2182	13.78	75.0063	4.26945	71.17	6.5	1.798	F (1, 17) = 0.5214	0.48	37.68	F (1, 17) = 10.93	0.0042	0.5111	F (1, 17) = 0.1482	0.705
malate	30.0744	4.38862	31.6633	5.23554	35.5334	7.91007	37.4474	2.74944	0.01945	F (1, 17) = 0.004410	0.9478	23.33	F (1, 17) = 5.288	0.0344	2.267	F (1, 17) = 0.5138	0.4832
PC activity	2.664	1	2.432	1	3.542	0.784	5.045	0.535	12.23	F (1, 16) = 4.965	0.0406	49.47	F (1, 16) = 20.09	0.0004	6.562	F (1, 16) = 2.665	0.1221
PEP	63.9963	2.96517	74.8128	11.1792	82.489	6.37838	83.5445	6.41721	5.744	F (1, 17) = 2.339	0.1446	44.72	F (1, 17) = 18.21	0.0005	8.5	F (1, 17) = 3.46	0.0802
proline	2.11	0.4	2.15	0.65	2.39	0.78	2.82	0.55	2.388	F (1, 17) = 0.5043	0.4872	14.35	F (1, 17) = 3.030	0.0998	3.609	F (1, 17) = 0.7622	0.3948
pyruvate	50.6678	3.16142	49.446	10.7652	62.9887	6.15485	59.4242	12.5703	0.3507	F (1, 17) = 0.09149	0.766	31.89	F (1, 17) = 8.320	0.0103	1.469	F (1, 17) = 0.3833	0.544
ribulose-5-phosphate	23.21	3.27	26.26	8.07	30.15	5.79	26.69	6.9	6.952	F (1, 17) = 1.420	0.2498	8.912	F (1, 17) = 1.820	0.195	0.02701	F (1, 17) = 0.005516	0.9417
sedoheptulose-7-phosphate	54.28	7.27	53.9	12.15	68.61	10.82	68.3	9.53	0.0002237	F (1, 17) = 6.157e-005	0.9938	37.98	F (1, 17) = 10.45	0.0049	0.02188	F (1, 17) = 0.006022	0.9391
serine	4.0154	0.943495	3.66964	0.417592	5.29025	0.706887	4.67576	1.51995	0.4007	F (1, 16) = 0.1037	0.7516	28.86	F (1, 16) = 7.470	0.0147	5.114	F (1, 16) = 1.324	0.2669
succinate	27.6371	5.06826	28.3907	5.49961	32.1409	7.44873	31.4023	2.11834	0.4883	F (1, 17) = 0.09551	0.761	12.33	F (1, 17) = 2.412	0.1389	5.823e-05	F (1, 17) = 1.139e-005	0.9973
tissue glucose	70.9777	1.37894	81.729	13.1357	91.6239	9.13844	94.3086	5.26928	2.87	F (1, 17) = 1.178	0.293	48.65	F (1, 17) = 19.95	0.0003	7.957	F (1, 17) = 3.264	0.0886
Xylulose-5-p and ribose-5-p (overlapping peak)	57.04	11	55.59	11.8	75.15	15.15	71.5	8.38	0.1557	F (1, 17) = 0.04351	0.8373	37.23	F (1, 17) = 10.40	0.005	0.8391	F (1, 17) = 0.2344	0.6345
Hepatic Mass Isotopomer MDVs measured in 13C-glucose infused mice
* indicates a statistical outlier that is removed for analysis
Diet (8 weeks)		CD	CD	CD	CD	CD	CD	CD	CD	CD	CD	HFD	HFD	HFD	HFD	HFD	HFD	HFD	HFD	HFD	HFD	HFD
Mouse		1	2	3	4	5	10	7	8	9	6	11	12	13	14	15	16	17	18	19	20	21
Injection at 2wks age		Vehicle	Vehicle	Vehicle	Vehicle	Vehicle	DEN	DEN	DEN	DEN	DEN	Vehicle	Vehicle	Vehicle	Vehicle	Vehicle	Vehicle	DEN	DEN	DEN	DEN	DEN
Blood 13C-glucose Enrichment		0.78233	0.8104	0.766331	0.777164	0.723497	0.60589	0.72737	0.334321	0.561366	0.541146	0.818741	0.869775	0.81225	0.745475	0.745362	0.827244	0.766559	0.899797	0.785215	0.751982	0.884649
6-phosphogluconate	M+0	0.247083	0.576145	0.248521	0.242115	0.265062	0.309359	0.123771	0.471423	0.20957	0.512124	0.211193	0.00423708	0.121835	0.177283	0.113266	0.106833	0.108923	0.0560082	0.175542	0.161124	0.128085
	M+1	0.121575	0.0307432	0.110596	0.111979	0.133444	0.112288	0.0484897	0.129891	0.566592	0.145964	0.103779	0.0932547	0.0761358	0.0880761	0.0550899	0.0612478	0.0725741	0.0224091	0.095125	0.0836943	0.0262075
	M+2	0.113561	0.0399775	0.105577	0.111442	0.119296	0.0955157	0.0429735	0.120157	0.0468235	0.112928	0.0968161	0.108789	0.0785403	0.100122	0.0639534	0.0720127	0.0903384	0.0377382	0.10178	0.0867451	0.0301776
	M+3	0.14031	0.053739	0.122205	0.109171	0.127658	0.110191	0.0461156	0.0963156	0.0415729	0.107318	0.129916	0.157738	0.119222	0.133931	0.110404	0.109721	0.133777	0.0499051	0.130284	0.118532	0.0691312
	M+4	0.0536875	0.0295539	0.0555586	0.0570525	0.059423	0.0502595	0.0224923	0.032586	0.0205345	0.0294944	0.0587749	0.0761961	0.0584785	0.0640314	0.0668989	0.0770313	0.0798184	0.0583064	0.0670383	0.0617048	0.0547244
	M+5	0.125388	0.114792	0.157482	0.175674	0.128179	0.154307	0.643907	0.0744739	0.0785218	0.00401136	0.133007	0.222701	0.177264	0.160414	0.198424	0.225994	0.222196	0.395097	0.023067	0.138138	0.251184
	M+6	0.198395	0.155049	0.20006	0.192568	0.166938	0.168079	0.0722502	0.0751536	0.0363854	0.0881604	0.266514	0.337084	0.368525	0.276143	0.391963	0.347159	0.292374	0.380536	0.407164	0.350061	0.44049
Fractional Abundance		0.466948	0.315731	0.483062	0.487393	0.439204	0.435824	0.669298	0.268798	0.246336	0.226795	0.531062	0.70414	0.653711	0.567527	0.687618	0.675915	0.639846	0.789921	0.586002	0.608443	0.735286
Blood glucose normalized (%)		59.6868	*	63.0356	62.7143	60.7058	71.9311	92.0163	80.4012	43.8816	41.9101	64.8633	80.9565	80.4814	76.1297	92.2529	81.7069	83.4699	87.7888	74.6294	80.9119	83.1161
AKG	M+0	0.719399	0.6882	0.710019	0.818527	0.779597	0.829401	0.753089	0.833233	0.733837	0.777833	0.6138	0.644655	0.7458	0.7207	0.6486	0.609252	0.7227	0.915331	0.591349	0.60183	0.5701
	M+1	0.105896	0.0896	0.0894017	0.0577596	0.0776602	0.0738501	0.0854922	0.0580188	0.144221	0.0970305	0.1475	0.16373	0.0931	0.0972	0.1079	0.139974	0.0773	0.00859091	0.150997	0.164994	0.1149
	M+2	0.0697027	0.0772	0.0690241	0.0444689	0.067778	0.0533307	0.04723	0.0628121	0.0929978	0.0576025	0.1227	0.1128	0.058	0.0894	0.1167	0.125387	0.0767	0	0.145467	0.134593	0.1438
	M+3	0.0439495	0.0509	0.0452502	0.0224843	0.0345378	0.0190325	0.0333798	0.0258638	0.0277501	0.0309862	0.0701	0.0788149	0.0449	0.0562	0.0846	0.0745329	0.0537	0.00593393	0.0754493	0.0706415	0.0983
	M+4	0.061052	0.0881	0.0863051	0.0567603	0.0404272	0.0243854	0.0808091	0.0200719	0.00119355	0.0365478	0.0385	0	0.0548	0.0342	0.0387	0.0508542	0.0599	0.0701444	0.0367371	0.0279418	0.0588
	M+5	0	0.006	0	0	0	0	0	0	0	0	0.0075	0	0.0034	0.0022	0.0035	0	0.0098	0	0	0	0.0141
Fractional Abundance		0.124272	0.15582	0.141684	0.0882382	0.0957077	0.0670301	0.120666	0.0683044	0.0836483	0.0902771	0.15894	0.125155	0.116	0.11848	0.15348	0.163553	0.13608	0.061394	0.163046	0.151574	0.20062
Blood glucose normalized (%)		15.8848	19.2275	18.4886	11.3539	13.2285	11.0631	16.5893	20.4308	14.9008	16.6826	19.4127	14.3893	14.2813	15.8932	20.5913	19.7708	17.7521	6.8231	20.7645	20.1566	22.6779
alanine	M+0	0.3998	0.4232	0.4219	0.4604	0.4796	0.4696	0.4336	0.7028	0.619	0.6938	0.3024	0.3201	0.3276	0.3674	0.3333	0.2553	0.4111	0.2284	0.3313	0.3703	0.2167
	M+1	0.0999	0.0958	0.0946	0.0983	0.1084	0.0818	0.0904	0.0613	0.0892	0.0735	0.0852	0.0863	0.0803	0.0854	0.0836	0.0807	0.0872	0.0717	0.0957	0.0849	0.0796
	M+2	0.0858	0.0832	0.0866	0.0784	0.0923	0.0861	0.08	0.0583	0.067	0.0628	0.0861	0.0839	0.0825	0.0874	0.0925	0.0878	0.0859	0.0937	0.0947	0.0859	0.0987
	M+3	0.4145	0.3978	0.3969	0.3629	0.3197	0.3626	0.396	0.1775	0.2247	0.1699	0.5264	0.5097	0.5095	0.4597	0.4906	0.5761	0.4158	0.6061	0.4784	0.459	0.605
Fractional Abundance		0.505	0.4852	0.486167	0.447933	0.417367	0.447222	0.479467	0.236824	0.29913	0.236267	0.612139	0.5944	0.591326	0.546488	0.580133	0.661599	0.502133	0.692536	0.573376	0.544512	0.697333
Blood glucose normalized (%)		64.5508	59.8716	63.4408	57.6369	57.6874	73.8123	65.9179	70.8373	53.2861	43.6604	74.7659	68.3395	72.8009	73.3074	77.8324	79.9764	65.5048	76.9658	73.0215	72.4103	78.826
aspartate	M+0	0.6726	0.6531	0.6248	0.7043	0.6486	0.6465	0.679	0.8558	0.7597	0.7922	0.6793	0.723	0.6671	0.6803	0.5161	0.6346	0.6344	0	0.6329	0.6711	0.536
	M+1	0.1477	0.1546	0.1571	0.143	0.1525	0.1568	0.1385	0.0687	0.1332	0.1044	0.1438	0.1389	0.1384	0.1388	0.1664	0.1641	0.1412	0	0.1478	0.1289	0.1465
	M+2	0.092	0.097	0.1027	0.0798	0.1053	0.1132	0.0891	0.0354	0.0721	0.0597	0.101	0.0762	0.0956	0.1075	0.1153	0.1151	0.0918	0.0565	0.1164	0.104	0.1428
	M+3	0.0604	0.0603	0.0701	0.0542	0.0455	0.0626	0.0194	0.0296	0.0315	0.0321	0.0583	0.0652	0.062	0.0528	0.1315	0.0578	0.0811	0	0.0771	0.0668	0.1064
	M+4	0.0273	0.0351	0.0453	0.0187	0.0481	0.0209	0.074	0.0105	0.0036	0.0116	0.0176	0	0.0368	0.0206	0.0707	0.0283	0.0514	0.9625	0.0258	0.0292	0.0684
Fractional Abundance		0.155525	0.167458	0.1885	0.135	0.173	0.16365	0.167725	0.067575	0.0965653	0.091625	0.147775	0.118337	0.165717	0.14865	0.268575	0.170242	0.193444	0.976477	0.178775	0.163525	0.256199
Blood glucose normalized (%)		19.8797	20.6636	24.5977	17.3708	23.9116	27.0098	23.0591	20.2126	17.2018	16.9317	18.0491	13.6054	20.4022	19.9403	*	20.5794	25.2354	*	22.7676	21.7459	28.9606
citrate	M+0	0.4294	0.4202	0.4191	0.5563	0.4621	0.4064	0.4946	0.7644	0.5673	0.6166	0.3781	0.4139	0.4239	0.4279	0.3347	0.3674	0.3843	0.3035	0.3859	0.3867	0.2925
	M+1	0.2604	0.2504	0.2367	0.2197	0.2416	0.2309	0.2138	0.1194	0.2226	0.1849	0.2662	0.2582	0.2437	0.2402	0.2571	0.2607	0.2614	0.194	0.2424	0.2574	0.2183
	M+2	0.1475	0.1537	0.1617	0.1129	0.1527	0.1673	0.1315	0.0725	0.114	0.1001	0.175	0.1669	0.1433	0.1502	0.1721	0.1826	0.153	0.1866	0.1805	0.1667	0.1962
	M+3	0.106	0.1022	0.1257	0.0714	0.0956	0.1328	0.0868	0.0352	0.0726	0.0684	0.1235	0.121	0.1075	0.125	0.1523	0.1286	0.1368	0.1751	0.1331	0.1311	0.1706
	M+4	0.0408	0.0465	0.04	0.0183	0.0359	0.0439	0.0331	0.0056	0.0202	0.0146	0.0473	0.0342	0.051	0.0448	0.0673	0.0473	0.0472	0.0857	0.047	0.0452	0.0803
	M+5	0.0146	0.0277	0.0159	0.0194	0.0111	0.016	0.0334	0.0041	0.0036	0.013	0.0086	0.005	0.0286	0.0117	0.0117	0.014	0.0145	0.0395	0.0093	0.0108	0.0319
	M+6	0.0014	0	0.0009	0.0021	0.001	0.0027	0.0068	0	0	0.0024	0.0013	0.0008	0.0018	0.0001	0.0048	0	0.0028	0.0156	0.0019	0.0021	0.0102
Fractional Abundance		0.186333	0.19745	0.197017	0.140417	0.17315	0.20595	0.179567	0.0676167	0.127567	0.12135	0.20445	0.186933	0.201767	0.192317	0.235783	0.211317	0.209317	0.287733	0.2081	0.20525	0.2774
Blood glucose normalized (%)		23.8177	24.3645	25.7091	18.0678	23.9324	33.9913	24.6871	20.2251	22.7243	22.4246	24.9713	21.4921	24.8405	25.7979	31.6334	25.5447	27.306	31.9776	26.5023	27.2945	31.3571
Dehydroxyacetone phosphate	M+0	0.42989	0.42459	0.50989	0.43146	0.47003	0.499	0.43236	0.67713	0.6314	0.7451	0.27751	0.29493	0.31822	0.33925	0.25931	0.223	0.44063	0.17973	0.28825	0.31565	0.15913
	M+1	0.09357	0.07965	0.07862	0.09835	0.10369	0.06795	0.08394	0.05805	0.08015	0.05881	0.0789	0.07388	0.07432	0.08668	0.0736	0.06374	0.06592	0.03288	0.07781	0.07889	0.04524
	M+2	0.06314	0.04928	0.05105	0.05271	0.06803	0.06246	0.05256	0.03682	0.03113	0.02427	0.06674	0.06164	0.05487	0.0756	0.05825	0.06364	0.05334	0.05935	0.06967	0.06321	0.06316
	M+3	0.41341	0.44648	0.36045	0.41748	0.35825	0.37059	0.43115	0.228	0.25732	0.17182	0.57684	0.56955	0.55259	0.49848	0.60884	0.64961	0.44011	0.72803	0.56428	0.54225	0.73248
Fractional Abundance		0.486688	0.505883	0.420686	0.485403	0.438167	0.43488	0.494165	0.271897	0.30479	0.207603	0.64764	0.63527	0.613943	0.577768	0.672207	0.71329	0.497643	0.778564	0.636657	0.610687	0.789659
Blood glucose normalized (%)		62.2101	62.4239	54.8961	62.4583	60.5623	71.7753	67.9386	81.3281	54.2943	38.3636	79.1019	73.0384	75.5855	77.5033	90.1853	86.225	64.9191	86.5267	81.0806	81.2103	89.2624
fructoses-bisphosphate	M+0	0.22216	0.20291	0.37482	0.17963	0.24696	0.27146	0.22048	0.40955	0.38944	0.51632	0.10352	0.12171	0.11494	0.1534	0.1017	0.08483	0.19722	0.04388	0.09682	0.11851	0.05066
	M+1	0.09124	0.07171	0.0646	0.08507	0.1021	0.07342	0.08225	0.08365	0.09516	0.08425	0.05431	0.05572	0.05683	0.0711	0.04551	0.03944	0.0548	0.01404	0.05289	0.0582	0.0214
	M+2	0.08689	0.06896	0.06015	0.07542	0.0966	0.08192	0.07648	0.08753	0.07666	0.07776	0.06233	0.06218	0.0634	0.07948	0.05717	0.04808	0.07034	0.02514	0.05972	0.06509	0.03332
	M+3	0.23228	0.26687	0.19292	0.31094	0.23695	0.2651	0.26783	0.25313	0.21841	0.1548	0.2458	0.22845	0.24585	0.25073	0.1973	0.20356	0.23081	0.1343	0.25974	0.23691	0.15276
	M+4	0.06519	0.06456	0.04212	0.07215	0.06403	0.0537	0.06235	0.03563	0.04175	0.02712	0.08067	0.07103	0.07342	0.07633	0.06997	0.0702	0.06132	0.0514	0.08115	0.07643	0.06194
	M+5	0.05488	0.05663	0.03901	0.05483	0.05159	0.0506	0.05374	0.03001	0.03109	0.02279	0.08144	0.07513	0.07401	0.07428	0.07978	0.08198	0.0611	0.08879	0.08287	0.07737	0.09458
	M+6	0.24736	0.26837	0.22638	0.22196	0.20178	0.2038	0.23686	0.10051	0.14749	0.11697	0.37193	0.38579	0.37155	0.29468	0.44857	0.47191	0.32441	0.64245	0.36682	0.3675	0.58533
Fractional Abundance		0.496863	0.52697	0.414245	0.51054	0.455145	0.45386	0.496332	0.318952	0.35185	0.271401	0.646305	0.639984	0.635702	0.571175	0.686992	0.711407	0.564192	0.828578	0.64857	0.63278	0.796493
Blood glucose normalized (%)		63.5107	65.0259	54.0556	65.6927	62.9091	74.9079	68.2365	95.4029	62.6775	50.1529	78.9389	73.5803	78.2643	76.619	92.1689	85.9972	73.6005	92.085	82.5978	84.1483	90.035
fumarate	M+0	0.5019	0.4846	0.5061	0.6339	0.5351	0.5218	0.5717	0.7788	0.6386	0.6827	0.4752	0.516	0.4798	0.4838	0.338	0.4725	0.4812	0.4748	0.4432	0.4906	0.3881
	M+1	0.2125	0.2219	0.2085	0.1767	0.2065	0.1886	0.1987	0.1021	0.173	0.1582	0.214	0.1933	0.2116	0.2042	0.2119	0.2147	0.2078	0.1482	0.2156	0.2004	0.201
	M+2	0.141	0.1424	0.1493	0.102	0.1369	0.1563	0.1095	0.0614	0.0924	0.0873	0.1678	0.1519	0.1612	0.159	0.1557	0.1721	0.1528	0.1507	0.1784	0.1579	0.2054
	M+3	0.1072	0.112	0.1017	0.0708	0.0922	0.0991	0.0941	0.0531	0.0757	0.0594	0.1028	0.1007	0.1061	0.1145	0.1944	0.1035	0.1163	0.1513	0.1228	0.1124	0.1428
	M+4	0.0374	0.039	0.0344	0.0166	0.0293	0.0342	0.0259	0.0045	0.0204	0.0125	0.0402	0.038	0.0412	0.0385	0.1	0.0372	0.0418	0.0751	0.0401	0.0388	0.0628
Fractional Abundance		0.241425	0.2497	0.23745	0.164875	0.218525	0.233825	0.20092	0.10056	0.166608	0.140236	0.2547	0.237824	0.2543	0.254925	0.376625	0.25455	0.257401	0.300945	0.275272	0.252125	0.322818
Blood glucose normalized (%)		30.8597	30.8119	30.9853	21.2149	30.204	38.592	27.6228	30.0789	29.6791	25.9146	31.1087	27.3431	31.3081	34.1963	50.5291	30.7709	33.5787	33.4459	35.057	33.528	36.4911
glycerol-3-phosphate	M+0	0.4045	0.4347	0.4892	0.4496	0.4886	0.5204	0.4462	0.7172	0.6381	0.7672	0.2997	0.3209	0.3293	0.3563	0.3092	0.2544	0.4154	0.2754	0.3301	0.3788	0.2083
	M+1	0.0894	0.084	0.0814	0.096	0.1069	0.0641	0.0836	0.0559	0.078	0.0618	0.0757	0.0749	0.0781	0.0872	0.0754	0.0646	0.0812	0.0259	0.0754	0.0797	0.0473
	M+2	0.0833	0.0787	0.0782	0.0778	0.0929	0.074	0.0767	0.0586	0.0636	0.0517	0.0845	0.0804	0.0845	0.0926	0.0854	0.0776	0.0829	0.0538	0.0852	0.0861	0.0766
	M+3	0.4228	0.4025	0.3512	0.3766	0.3116	0.3415	0.3936	0.1682	0.2202	0.1194	0.54	0.5239	0.5082	0.4639	0.5301	0.6034	0.4205	0.6448	0.5093	0.4553	0.6678
Fractional Abundance		0.508133	0.483015	0.430467	0.460467	0.409167	0.4122	0.472553	0.225923	0.288629	0.174449	0.621629	0.602406	0.590508	0.5547	0.612105	0.676667	0.502833	0.689369	0.591233	0.539321	0.734633
Blood glucose normalized (%)		64.9513	59.602	56.1724	59.2496	56.554	68.0321	64.9673	67.5766	51.4154	32.237	75.925	69.26	72.7002	74.409	82.1219	81.7978	65.5961	76.6138	75.2957	71.7199	83.0424
glycine	M+0	0.9557	0.9569	0.9486	0.9662	0.9599	0.966	0.9613	0.9859	0.9631	0.9674	0.9456	0.9595	0.9551	0.9475	0.9461	0.9425	0.9581	0.9328	0.9465	0.9459	0.9573
	M+1	0.0199	0.0193	0.0208	0.0168	0.0185	0.0131	0.0186	0.0049	0.0174	0.0136	0.0214	0.0176	0.0169	0.0171	0.0233	0.0233	0.0232	0.0376	0.0186	0.0207	0.0201
	M+2	0.0244	0.0239	0.0306	0.017	0.0216	0.0209	0.0201	0.0092	0.0195	0.019	0.0331	0.0229	0.028	0.0354	0.0307	0.0342	0.0187	0.0296	0.0348	0.0334	0.0227
Fractional Abundance		0.03435	0.03355	0.041	0.0254	0.03085	0.02745	0.0294	0.01165	0.0282	0.0258	0.0438	0.0317	0.03645	0.04395	0.04235	0.04585	0.0303	0.0484	0.0441	0.04375	0.03275
Blood glucose normalized (%)		4.39073	4.13993	5.35017	3.26829	4.26401	4.53052	4.04196	3.48468	5.02346	4.76766	5.34968	3.64462	4.48753	5.89557	5.6818	5.5425	3.95273	5.37899	5.6163	5.81796	3.70203
hexose-phosphates	M+0	0.26459	0.30258	0.33916	0.29794	0.31698	0.40973	0.26924	0.50413	0.5324	0.55339	0.18754	0.16954	0.19484	0.19192	0.17415	0.14328	0.14677	0.09917	0.18098	0.24165	0.08967
	M+1	0.11232	0.07646	0.08695	0.10133	0.10486	0.06539	0.09032	0.0857	0.07863	0.07779	0.06251	0.06716	0.06624	0.08235	0.05402	0.04692	0.05626	0.01406	0.06635	0.06415	0.02468
	M+2	0.09778	0.06747	0.0799	0.08321	0.0949	0.07045	0.07953	0.08672	0.06019	0.06875	0.06306	0.0698	0.06422	0.08742	0.05714	0.04932	0.06337	0.02287	0.06751	0.06314	0.03295
	M+3	0.14379	0.11937	0.12543	0.12781	0.13747	0.11	0.13062	0.10661	0.09487	0.08496	0.1272	0.1301	0.12372	0.15179	0.1223	0.11194	0.13089	0.06842	0.13255	0.12417	0.08412
	M+4	0.04729	0.04477	0.04624	0.04517	0.04779	0.03663	0.0461	0.02396	0.0289	0.02381	0.04992	0.05112	0.04553	0.05597	0.05218	0.04814	0.05806	0.04157	0.04917	0.04654	0.04443
	M+5	0.04306	0.04564	0.04347	0.04234	0.0417	0.03821	0.04634	0.02348	0.02496	0.02216	0.06009	0.06091	0.05618	0.05953	0.0642	0.06628	0.06809	0.07948	0.05933	0.05376	0.07822
	M+6	0.29117	0.3437	0.27884	0.3022	0.25631	0.26961	0.33786	0.1694	0.18006	0.16914	0.44966	0.45138	0.44927	0.37102	0.47601	0.53413	0.47655	0.67443	0.44411	0.40658	0.64593
Fractional Abundance		0.481788	0.506503	0.449736	0.476127	0.440761	0.415253	0.514083	0.301435	0.30073	0.281842	0.628053	0.635728	0.620747	0.576702	0.653497	0.701687	0.667943	0.812553	0.626168	0.57623	0.79789
Blood glucose normalized (%)		61.5838	62.5004	58.6869	61.2646	60.9209	68.536	70.677	90.1634	53.5711	52.0823	76.7097	73.0911	76.4231	77.3603	87.6751	84.8223	87.1352	90.3041	79.7448	76.6282	90.1928
lactate	M+0	0.3926	0.4227	0.423	0.4552	0.4799	0.474	0.4235	0.6875	0.627	0.6977	0.2966	0.3259	0.3188	0.3623	0.3258	0.256	0.3983	0.3762	0.3306	0.3717	0.208
	M+1	0.0988	0.0941	0.0925	0.0967	0.1071	0.0794	0.0906	0.0629	0.0829	0.0723	0.0848	0.082	0.0791	0.0856	0.0833	0.0791	0.0863	0.0512	0.0933	0.0835	0.0759
	M+2	0.0867	0.0838	0.0859	0.0787	0.0933	0.0857	0.083	0.0623	0.0646	0.0624	0.0874	0.0842	0.0842	0.0895	0.0937	0.0885	0.0862	0.0712	0.095	0.086	0.0989
	M+3	0.4219	0.3994	0.3986	0.3695	0.3197	0.3609	0.4029	0.1873	0.2254	0.1676	0.5312	0.5079	0.518	0.4625	0.4971	0.5764	0.4292	0.5014	0.4812	0.4589	0.6172
Fractional Abundance		0.512633	0.486633	0.4867	0.454155	0.4176	0.4445	0.488433	0.2498	0.29613	0.2333	0.617733	0.591367	0.60044	0.550755	0.587392	0.661767	0.515433	0.565933	0.575576	0.544012	0.708433
Blood glucose normalized (%)		65.5265	60.0485	63.5104	58.4374	57.7197	73.3631	67.1506	74.7187	52.7516	43.1122	75.4492	67.9907	73.923	73.8798	78.8063	79.9966	67.2399	62.8957	73.3017	72.3438	80.0807
malate	M+0	0.4837	0.4716	0.4984	0.6205	0.5043	0.495	0.5535	0.7748	0.6212	0.6741	0.4661	0.4842	0.4654	0.4728	0.33	0.4348	0.4625	0.3503	0.4283	0.4687	0.358
	M+1	0.2203	0.2241	0.2081	0.18	0.2176	0.2032	0.208	0.1012	0.1769	0.1599	0.2162	0.206	0.2123	0.2063	0.2131	0.2224	0.2123	0.1752	0.2185	0.2047	0.2044
	M+2	0.1419	0.1434	0.1492	0.1033	0.1461	0.1604	0.1111	0.0625	0.0963	0.0904	0.1659	0.1625	0.1629	0.1627	0.1585	0.1763	0.1558	0.1844	0.1765	0.1621	0.21
	M+3	0.115	0.1214	0.1096	0.0802	0.101	0.1102	0.1032	0.0565	0.0871	0.0645	0.1102	0.1122	0.1187	0.1209	0.1987	0.1279	0.1266	0.2069	0.1367	0.1217	0.1613
	M+4	0.039	0.0395	0.0347	0.016	0.031	0.0311	0.0242	0.005	0.0184	0.011	0.0416	0.0352	0.0406	0.0373	0.0997	0.0386	0.0428	0.0832	0.04	0.0428	0.0663
Fractional Abundance		0.2513	0.258275	0.243525	0.1728	0.2342	0.244774	0.20915	0.103925	0.176118	0.144564	0.26125	0.252075	0.264176	0.2609	0.38125	0.278275	0.268725	0.374375	0.2854	0.2663	0.343375
Blood glucose normalized (%)		32.122	31.8701	31.778	22.2347	32.3706	40.3991	28.7543	31.0854	31.373	26.7145	31.9088	28.9816	32.524	34.9978	51.1497	33.6388	35.056	41.6066	36.3467	35.4131	38.8148
PEP	M+0	0.40482	0.38468	0.47122	0.40965	0.43422	0.47149	0.37077	0.63296	0.56199	0.59123	0.25962	0.27947	0.27129	0.31596	0.23713	0.22113	0.3647	0.17464	0.30488	0.28657	0.13431
	M+1	0.10164	0.0765	0.07944	0.0951	0.09712	0.06604	0.07536	0.06002	0.07257	0.06845	0.07687	0.07347	0.07111	0.08875	0.06714	0.06403	0.06826	0.03382	0.08116	0.07928	0.05245
	M+2	0.08286	0.06728	0.06925	0.07413	0.08092	0.06844	0.0704	0.05963	0.05253	0.06129	0.07937	0.07731	0.07406	0.08908	0.0747	0.07262	0.07002	0.06131	0	0.08183	0.07648
	M+3	0.41068	0.47154	0.38009	0.42113	0.38774	0.39403	0.48347	0.24739	0.31292	0.27903	0.58414	0.56975	0.58354	0.50622	0.62103	0.64222	0.49702	0.73023	0.61396	0.55233	0.73676
Fractional Abundance		0.4998	0.541893	0.452737	0.502245	0.47406	0.46167	0.555523	0.30715	0.372126	0.342707	0.662677	0.64578	0.656617	0.595184	0.69321	0.711977	0.566453	0.782377	0.641013	0.633304	0.80523
Blood glucose normalized (%)		63.8861	66.8674	59.0785	64.6253	65.5234	76.1969	76.3743	91.8729	66.2894	63.3298	80.9385	74.2468	80.8392	79.8396	93.0031	86.0662	73.8956	86.9504	81.6354	84.2179	91.0225
proline	M+0	0.9595	0.9619	0.9498	0.9656	0.966	0.9658	0.9573	0.9745	0.9724	0.9681	0.9466	0.9696	0.9516	0.9487	0.945	0.9586	0.9511	0.9353	0.933	0.9572	0.9526
	M+1	0.0206	0.0223	0.0244	0.0181	0.0186	0.0221	0.0237	0.0142	0.0217	0.0183	0.028	0.0239	0.0273	0.0261	0.0262	0.0169	0.0229	0.0309	0.0331	0.0168	0.0202
	M+2	0.0132	0.0137	0.0199	0.0113	0.0106	0.0079	0.0139	0.0081	0.0097	0.0118	0.0188	0.0073	0.0136	0.0199	0.0203	0.0171	0.0195	0.0183	0.0263	0.026	0.0178
	M+3	0.0044	0	0.0033	0.0034	0.0034	0.0033	0.004	0.0034	0	0.0024	0.0047	0.0031	0.005	0.0035	0.0061	0.0044	0.0039	0.0141	0.0061	0.0033	0.0067
	M+4	0.0023	0.0028	0.0026	0.0016	0.0014	0.0009	0.0011	0	0	0	0.002	0	0.0025	0.0018	0.0023	0.003	0.0026	0.0014	0.0016	0	0.0026
Fractional Abundance		0.01735	0.0147	0.021125	0.014325	0.0139	0.01285	0.016975	0.00995	0.0066	0.011675	0.0219228	0.00805	0.019875	0.0209	0.0235774	0.019075	0.021	0.02885	0.0275972	0.016375	0.0215772
Blood glucose normalized (%)		2.21773	1.81392	2.75664	1.84324	1.92122	2.12085	2.33375	2.97618	1.1757	2.15746	2.67762	0.925526	2.44691	2.80358	3.16321	2.30585	2.73951	3.20628	3.51461	2.17758	2.43906
pyruvate	M+0	0.5133	0.5299	0.5246	0.5743	0.5385	0.5801	0.5169	0.7598	0.6895	0.7701	0.3775	0.5007	0.4105	0.4482	0.4205	0.3853	0.5565	0.5456	0.3876	0.4504	0.2771
	M+1	0.0755	0.0653	0.0637	0.0772	0.0844	0.0797	0.0769	0.0479	0.0742	0.0513	0.0726	0.0505	0.075	0.0753	0.0875	0.0565	0.0627	0.0706	0.0783	0.0741	0.0607
	M+2	0.0754	0.0705	0.0774	0.0614	0.0786	0.0623	0.0696	0.0522	0.0452	0.0511	0.0806	0.0706	0.074	0.0792	0.077	0.0765	0.064	0.0465	0.0876	0.0901	0.0882
	M+3	0.3358	0.3343	0.3343	0.2871	0.2985	0.278	0.3365	0.1401	0.1911	0.1276	0.4693	0.3781	0.4405	0.3973	0.4149	0.4818	0.3168	0.3373	0.4464	0.3854	0.574
Fractional Abundance		0.411233	0.403067	0.407133	0.353767	0.379033	0.346065	0.408574	0.190867	0.245967	0.178749	0.547233	0.442044	0.514833	0.4752	0.49545	0.551578	0.380367	0.391833	0.530953	0.470167	0.653033
Blood glucose normalized (%)		52.5652	49.7367	53.1276	45.5202	52.3891	57.1168	56.1715	57.0909	43.8157	33.0315	66.8384	50.8228	63.3836	63.7446	66.471	66.6766	49.62	43.5469	67.6188	62.5236	73.8184
ribulose-5-phosphate	M+0	0.661087	0.66823	0.740163	0.670858	0.669365	0.767449	0.627613	0.790356	0.584911	0.763507	0.671302	0.587841	0.689186	0.593659	0.587064	0.600662	0.740411	0.680875	0.67904	0.679456	0.573198
	M+1	0.0923393	0.0758432	0.0834366	0.0754206	0.0890426	0.0737961	0.0852632	0.0856148	0.0828293	0.103637	0.0845763	0.0694605	0.0648299	0.0996039	0.0674948	0.0579201	0.065215	0.0394108	0.0712947	0.0915416	0.0355472
	M+2	0.0643255	0.0571216	0.0509396	0.0522681	0.083889	0.0473377	0.095742	0.0480881	0.128235	0.0629144	0.0638826	0.0780402	0.0557404	0.0705824	0.0734288	0.0583908	0.0488798	0.0253608	0.0583726	0.0550971	0.0455341
	M+3	0.0749103	0.0532679	0.054725	0.0869671	0.0772009	0.0545201	0.0752633	0.045878	0.13638	0.0502335	0.0743755	0.0875549	0.0608821	0.0651269	0.0650353	0.0656374	0.062911	0.0639187	0.0641545	0.0494131	0.067566
	M+4	0.0422533	0.0440587	0.0327075	0.0367486	0.0273525	0.0162434	0.0296396	0.0144105	0.0251777	0.00621569	0.0400707	0.052943	0.0346155	0.0659729	0.0574358	0.0551965	0.0253487	0.0286826	0.0403455	0.0502586	0.0396953
	M+5	0.0650849	0.101479	0.0380281	0.0777374	0.0531503	0.0406533	0.0864786	0.0156526	0.0424669	0.0134923	0.0657929	0.12416	0.0947458	0.105055	0.149541	0.162194	0.0572346	0.161752	0.0867923	0.0742336	0.238459
Fractional Abundance		0.188032	0.206704	0.134092	0.195308	0.172717	0.120054	0.210698	0.091066	0.212297	0.0944981	0.184943	0.264156	0.19423	0.245063	0.277381	0.280674	0.147855	0.241076	0.195169	0.184436	0.336078
Blood glucose normalized (%)		24.0348	25.5064	17.4979	25.1308	23.8725	19.8145	28.9671	27.2391	37.8179	17.4626	22.5887	30.3706	23.9125	32.8735	37.2143	33.9288	19.2881	26.7923	24.8555	24.5266	37.99
sedoheptulose-7-phosphate	M+0	0.187013	0.120256	0.235176	0.157154	0.226845	0.304791	0.219008	0.383359	0.350515	0.42592	0.180675	0.00991758	0.130743	0.110315	0.0796717	0.0334451	0.201287	0.0926568	0.111285	0.143995	0.0373037
	M+1	0.117503	0.0633232	0.122377	0.0948169	0.136913	0.119427	0.109743	0.137883	0.117086	0.143752	0.105014	0.0671327	0.0674093	0.0856285	0.0560497	0.020792	0.0672968	0.0263561	0.0677998	0.0823977	0.0178427
	M+2	0.163796	0.181201	0.182298	0.169065	0.183786	0.175138	0.172883	0.165327	0.199002	0.149609	0.1683	0.135641	0.190594	0.154237	0.154963	0.0638835	0.221587	0.191411	0.162307	0.174514	0.12763
	M+3	0.155338	0.12134	0.147546	0.143981	0.151569	0.138246	0.153515	0.134607	0.121742	0.1238	0.142201	0.154201	0.125573	0.159684	0.129451	0.0581186	0.110252	0.0751201	0.134154	0.143088	0.0721288
	M+4	0.146872	0.139354	0.131483	0.151417	0.128449	0.11319	0.13863	0.096795	0.0889293	0.0904364	0.170373	0.183515	0.132852	0.159234	0.150812	0.0770921	0.109836	0.0867699	0.15444	0.148564	0.0901077
	M+5	0.0877549	0.0955351	0.073426	0.110176	0.0739886	0.0642206	0.0807249	0.0415369	0.0685544	0.0337264	0.0823737	0.112839	0.0965284	0.103613	0.105174	0.535821	0.088301	0.100993	0.0962002	0.0918201	0.0889128
	M+6	0.0611556	0.0975826	0.054129	0.0723201	0.0503213	0.0393488	0.0520885	0.0202104	0.0236464	0.0168547	0.0637547	0.115188	0.0914535	0.0976064	0.109863	0.0618083	0.0672429	0.0117256	0.101968	0.0863442	0.135642
	M+7	0.0805675	0.18141	0.053565	0.10107	0.0481278	0.045638	0.0734079	0.0202823	0.0305243	0.0159011	0.0873092	0.221565	0.164847	0.129684	0.214015	0.149039	0.134198	0.414968	0.171846	0.129277	0.430432
Fractional Abundance		0.409754	0.525742	0.360343	0.451835	0.354536	0.316266	0.385798	0.247209	0.276337	0.222455	0.422181	0.620194	0.506002	0.503082	0.577247	0.67493	0.437845	0.637387	0.529767	0.476722	0.731623
Blood glucose normalized (%)		52.3761	64.8744	47.0218	58.139	49.0031	52.1986	53.0401	73.9435	49.2257	41.1081	51.5647	71.3051	62.2963	67.4848	77.4453	81.5879	57.1182	70.8368	67.4678	63.3954	82.7021
serine	M+0	0.9288	0.9383	0.9133	0.9514	0.9461	0.9487	0.9436	0.9791	0.9628	0.9598	0.9058	0.9243	0.911	0.8984	0.9206	0.9177	0.9448	0.9761	0.9051	0.9067	0.9365
	M+1	0.0459	0.0363	0.0543	0.0317	0.0329	0.0318	0.0335	0.0133	0.019	0.0227	0.0596	0.0422	0.0561	0.0652	0.0486	0.0494	0.0367	0.0513	0.0579	0.0587	0.0409
	M+2	0.0206	0.0215	0.0261	0.0139	0.0174	0.0162	0.0159	0.006	0.0134	0.0142	0.0284	0.0299	0.0258	0.0292	0.0242	0.0255	0.016	0	0.028	0.0271	0.0186
	M+3	0.0048	0.0039	0.0063	0.003	0.0036	0.0032	0.007	0.0016	0.0048	0.0033	0.0062	0.0037	0.007	0.0071	0.0065	0.0074	0.0025	0	0.009	0.0075	0.0041
Fractional Abundance		0.0338333	0.0303333	0.0418	0.0228333	0.0261667	0.0246	0.0287667	0.0100333	0.0200667	0.0203333	0.045	0.0377	0.0429	0.0483	0.0388333	0.0408667	0.0254	0	0.0469667	0.0451333	0.0301333
Blood glucose normalized (%)		4.32469	3.74301	5.45456	2.93803	3.61669	4.06014	3.95489	3.00111	3.57461	3.75746	5.49625	4.33445	5.28162	6.47909	5.21	4.9401	3.31351	*	5.98138	6.00192	3.40625
succinate	M+0	0.5278	0.4964	0.4843	0.661	0.5179	0.5089	0.5484	0.8018	0.6537	0.698	0.4796	0.5307	0.4796	0.4925	0.3663	0.4551	0.5092	0.4989	0.4653	0.5016	0.3835
	M+1	0.2144	0.2182	0.2171	0.1656	0.2133	0.1975	0.2147	0.0951	0.172	0.1509	0.2237	0.203	0.216	0.2085	0.2125	0.2259	0.1972	0.148	0.2224	0.2027	0.2065
	M+2	0.157	0.16	0.1775	0.1072	0.1539	0.1909	0.1171	0.0665	0.1093	0.1022	0.1845	0.1804	0.1791	0.1804	0.1781	0.1981	0.179	0.1957	0.204	0.1967	0.2494
	M+3	0.0736	0.0924	0.0884	0.0532	0.0864	0.0775	0.094	0.0336	0.0531	0.0417	0.0811	0.065	0.092	0.0901	0.1598	0.0881	0.0833	0.0978	0.0821	0.0723	0.1068
	M+4	0.0272	0.033	0.0328	0.0131	0.0285	0.0252	0.0257	0.003	0.0119	0.0073	0.031	0.0208	0.0334	0.0286	0.0832	0.0327	0.0313	0.0596	0.0263	0.0267	0.0538
Fractional Abundance		0.2145	0.23685	0.242101	0.147985	0.223575	0.22815	0.208446	0.085225	0.149375	0.127387	0.240024	0.210521	0.245925	0.238476	0.34526	0.254325	0.232575	0.2678	0.24545	0.22995	0.310225
Blood glucose normalized (%)		27.4181	29.2263	31.5922	19.0417	30.902	37.6553	28.6575	25.492	26.6092	23.5403	29.3162	24.2041	30.277	31.9898	46.3211	30.7437	30.3401	29.7623	31.259	30.5792	35.0676
tissue glucose	M+0	0.19957	0.21797	0.22927	0.21707	0.24415	0.28086	0.22134	0.44782	0.39524	0.43126	0.04442	0.11596	0.11709	0.14375	0.10172	0.08005	0.09721	0.02354	0.12024	0.12507	0.03206
	M+1	0.10194	0.08263	0.09003	0.10819	0.1096	0.07173	0.08967	0.09573	0.09339	0.08935	0.04276	0.06295	0.06504	0.07731	0.05609	0.04669	0.05212	0.01242	0.06504	0.06851	0.02319
	M+2	0.08782	0.07486	0.08597	0.08742	0.10014	0.07842	0.08052	0.09389	0.07431	0.0791	0.02248	0.06374	0.06525	0.0802	0.05962	0.04957	0.05912	0.01766	0.06697	0.06925	0.031
	M+3	0.12713	0.12774	0.13176	0.12871	0.14371	0.11742	0.13248	0.11007	0.10906	0.09404	0.04628	0.11516	0.12051	0.13403	0.12261	0.10553	0.1176	0.05476	0.13066	0.12888	0.07234
	M+4	0.04306	0.04896	0.05162	0.04662	0.05133	0.04275	0.04905	0.02556	0.03513	0.02654	0.01745	0.04681	0.04639	0.0508	0.05526	0.04714	0.05474	0.03245	0.05181	0.05161	0.0407
	M+5	0.04701	0.05099	0.05143	0.04576	0.04652	0.04826	0.04992	0.02594	0.03294	0.02918	0.02191	0.06196	0.06083	0.06001	0.06822	0.06917	0.07031	0.07703	0.0641	0.06173	0.07795
	M+6	0.39347	0.39685	0.35993	0.36623	0.30455	0.36055	0.37704	0.201	0.25994	0.25052	0.80471	0.53342	0.52489	0.4539	0.53648	0.60186	0.5489	0.78214	0.50118	0.49495	0.72276
Fractional Abundance		0.57118	0.574577	0.546738	0.54697	0.501038	0.526072	0.559365	0.341943	0.405675	0.380808	0.872362	0.705578	0.699353	0.644408	0.720697	0.767998	0.731178	0.903302	0.68763	0.67974	0.86522
Blood glucose normalized (%)		73.0101	70.9004	71.3448	70.3802	69.2523	86.8262	76.9024	102.28	72.2657	70.3707	106.549	81.1219	86.1007	86.4427	96.6908	92.8382	95.3844	100.39	87.5722	90.3931	97.8038
Xylulose-5-p and ribose-5-p (overlapping peak)	M+0	0.321043	0.137465	0.327071	0.267884	0.337177	0.401283	0.319364	0.510833	0.443011	0.535442	0.259948	0.062268	0.171476	0.213249	0.121769	0.175075	0.271352	0.225179	0.176375	0.20129	0.0743942
	M+1	0.107622	0.0556649	0.107882	0.0902161	0.124521	0.0863213	0.0950254	0.104645	0.104633	0.109706	0.0964512	0.0204228	0.0596964	0.0775786	0.0446857	0.046134	0.0685535	0.0267749	0.0629058	0.062095	0.0130278
	M+2	0.169925	0.155657	0.178558	0.16759	0.170089	0.151664	0.177033	0.167296	0.160752	0.171496	0.173575	0.0398476	0.159722	0.178612	0.162595	0.146075	0.132722	0.084162	0.170327	0.172591	0.115163
	M+3	0.218306	0.229445	0.211888	0.241089	0.198488	0.195708	0.212229	0.14601	0.199761	0.1378	0.235953	0.0785219	0.237613	0.226217	0.227245	0.213116	0.236737	0.227041	0.241198	0.248047	0.184778
	M+4	0.0568021	0.0914548	0.0536797	0.0640942	0.0563024	0.0367209	0.0521232	0.0204021	0.0301331	0.0150579	0.0638661	0.0232102	0.0832041	0.0855362	0.09151	0.0791335	0.0687796	0.060267	0.0740117	0.0682198	0.087094
	M+5	0.126303	0.330314	0.12092	0.169126	0.113422	0.128303	0.144225	0.0508144	0.0617095	0.0304983	0.170206	0.775729	0.288289	0.218808	0.352196	0.340466	0.221856	0.376576	0.275182	0.247757	0.525543
Fractional Abundance		0.392222	0.61454	0.383997	0.450134	0.370497	0.353035	0.403079	0.242589	0.2909	0.215764	0.451591	0.861434	0.573248	0.509927	0.635726	0.5993	0.485722	0.600034	0.559822	0.532617	0.754756
Blood glucose normalized (%)		50.1351	75.8317	50.1084	57.9201	51.2092	58.267	55.416	72.5619	51.82	39.8717	55.1568	99.041	70.5753	68.403	85.2909	72.4454	63.3639	66.6855	71.2954	70.8284	85.317

## Sheet: table S3
Hepatic Metabolites - Relative Abundance
	Relative metabolite abundance (arbitrary units/mg tissue, normalized to control diet-vehicle)								Results of 2-Way ANOVA Testing
	8-weeks Control diet				8-weeks High-fat diet
	vehicle		DEN		vehicle		DEN		interaction			diet			DEN
	Average	STDev	Average	STDev	Average	STDev	Average	STDev	eta2	F (DFn, DFd)	P value	eta2	F (DFn, DFd)	P value	eta2	F (DFn, DFd)	P value
6-phosphogluconate	1	0.438346	1.0593	0.732893	0.891513	0.42	1.07532	0.86322	0.2888	F (1, 20) = 0.05868	0.8111	0.1644	F (1, 20) = 0.03341	0.8568	1.644	F (1, 12) = 0.2137	0.6488
AKG	1	0.207555	1.386	0.442	1.627	0.241	1.75096	0.841039	1.422	F (1, 19) = 0.3631	0.5539	20.39	F (1, 19) = 5.206	0.0342	5.387	F (1, 19) = 1.376	0.2553
Alanine	1	0.238341	1.32521	0.796137	1.703	0.187	2.775	1.698	2.712	F (1, 18) = 0.8025	0.3816	22.56	F (1, 18) = 6.675	0.0182	9.5	F (1, 18) = 2.811	0.11
Aspartate	1	0.891924	1.61153	1.14683	1.30967	1.32533	1.539	1.4	0.7077	F (1, 19) = 0.1406	0.7119	0.2707	F (1, 19) = 0.05378	0.8191	3.414	F (1, 19) = 0.6781	0.4205
Citrate	1	0.0879136	2.51079	1.80728	2.53354	1.29676	8.20969	7.91363	4.504	F (1, 18) = 0.1.211	0.2856	13.58	F (1, 18) = 3.652	0.0721	13.41	F (1, 18) = 3.606	0.0737
DHAP	1	0.241325	0.791	0.315	1.05	0.32	0.993	0.254	1.792	F (1, 21) = 0.4336	0.5174	4.891	F (1, 21) = 1.183	0.2891	5.434	F (1, 21) = 1.314	0.2645
FBP	1	0.348328	0.814	0.296	0.725	0.247	0.684	0.339	1.388	F (1, 20) = 0.3250	0.575	10.77	F (1, 20) = 2.522	0.128	3.408	F (1, 20) = 0.7980	0.3823
Fumarate	1	0.332279	1.186	0.433	1.74141	0.429611	1.505	0.463	4.839	F (1, 19) = 1.425	0.2473	30.59	F (1, 19) = 9.004	0.0074	0.06963	F (1, 19) = 0.0205	0.8877
GAP	1	0.13	1.183	0.397	2.619	1.811	4.806	4.468	3.778	F (1, 21) = 1.015	0.327	25.84	F (1, 21) = 6.944	0.0168	5.285	F (1, 21) = 1.420	0.2488
Glucose	1	0.0906937	0.781	0.342	0.754	0.185	0.785	0.144	7.598	F (1, 20) = 1.829	0.1913	7.127	F (1, 20) = 1.716	0.2051	4.273	F (1, 20) = 1.029	0.3226
Glycerol-3-phosphate	1	0.226	1.0055	0.342315	1.59327	0.464531	1.74785	1.04882	0.3118	F (1, 18) = 0.07627	0.7856	25.02	F (1, 18) = 6.122	0.0235	0.03594	F (1, 18) = 0.08793	0.7702
Glycine	1	0.221	0.804	0.195	1.056	0.302	1.029	0.448	2.101	F (1, 17) = 0.4087	0.5312	5.816	F (1, 17) = 1.131	0.3024	3.638	F (1, 17) = 0.7075	0.4119
hexose-phosphates	1	0.193411	0.849	0.399	0.871	0.447	0.851	0.347	0.9094	F (1, 21) = 0.1967	0.662	0.8502	F (1, 21) = 0.1839	0.6724	1.534	F (1, 21) = 0.3319	0.5707
Isoleucine	1	0.45178	1.43106	0.430115	1.243	0.267	2.075	0.886	2.336	F (1, 19) = 0.7022	0.4125	11.43	F (1, 19) = 3.435	0.0794	23.18	F (1, 19) = 6.968	0.0162
Lactate	1	0.263653	1.059	0.508	1.398	0.2127	1.866	0.878536	2.725	F (1, 19) = 0.7654	0.3926	23.59	F (1, 19) = 6.628	0.0186	4.529	F (1, 19) = 1.272	0.2734
Leucine	1	0.376657	1.33886	0.356018	1.20853	0.300876	1.938	0.846	2.681	F (1, 19) = 0.7749	0.3897	11.47	F (1, 19) = 3.315	0.0844	20.07	F (1, 19) = 5.801	0.0263
Malate	1	0.239927	1.103	0.34	1.354	0.267	1.445	0.259	0.01028	F (1, 18) = 0.002699	0.9591	30.15	F (1, 18) = 7.917	0.0115	2.348	F (1, 18) = 0.6165	0.4426
PEP	1	0.55	0.726	0.071	1.058	0.437	1.182	0.308	10.36	F (1, 21) = 3.253	0.0857	17.33	F (1, 21) = 5.441	0.0297	1.479	F (1, 21) = 0.4643	0.5031
Phenylalanine	1	0.44665	1.17675	0.406272	1.3242	0.743632	1.643	1.397	0.1889	F (1, 19) = 0.03918	0.8452	5.86	F (1, 19) = 1.216	0.284	2.302	F (1, 19) = 0.4776	0.4979
Proline	1	0.452579	1.89884	1.20532	1.37479	0.42707	1.76	0.798	2.287	F (1, 19) = 0.5244	0.4778	0.4851	F (1, 19) = 0.1112	0.7424	14.32	F (1, 19) = 3.285	0.0858
Pyruvate	1	0.328333	1.26343	0.665444	2.28394	1.71124	3.16844	1.82422	1.102	F (1, 20) = 0.3320	0.5709	29.06	F (1, 20) = 8.752	0.0078	3.765	F (1, 20) = 1.134	0.2996
ribulose-5-p	1	0.543524	0.691437	0.370176	1.313	0.477	0.682476	0.371935	2.757	F (1, 19) = 0.7517	0.3967	2.459	F (1, 19) = 0.6704	0.4231	23.45	F (1, 19) = 6.394	0.0205
Sedoheptulose-5-p	1	0.308669	0.569121	0.216353	1.0337	0.407521	0.66775	0.407842	0.1866	F (1, 19) = 0.05025	0.825	0.7751	F (1, 19) = 0.2087	0.6529	28.1	F (1, 19) = 7.568	0.0127
Serine	1	0.27733	1.19787	0.369298	1.25573	0.486093	1.506	0.776	0.06569	F (1, 19) = 0.01426	0.9062	7.71	F (1, 19) = 1.674	0.2113	4.869	F (1, 19) = 1.057	0.3168
Succinate	1	0.199279	0.801	0.354	1.33872	0.484636	1.72794	0.863848	5.624	F (1, 19) = 1.659	0.2133	26.05	F (1, 19) = 7.681	0.0122	0.5897	F (1, 19) = 0.1739	0.6814
Threonine	1	0.328634	1.30898	0.428978	1.05153	0.344397	1.238	0.297	0.7423	F (1, 18) = 0.1547	0.6987	0.01923	F (1, 18) = 0.004006	0.9502	12.07	F (1, 18) = 2.514	0.1303
Valine	1	0.418716	1.62964	0.508542	1.17362	0.229834	2.177	1.04	1.578	F (1, 19) = 0.4757	0.4987	5.868	F (1, 19) = 1.770	0.1992	30.1	F (1, 19) = 9.076	0.0072
Xylulose-5-p and ribose-5-p (overlapping peak)	1	0.635092	0.859113	0.501213	1.361	0.413	0.61	0.312	8.799	F (1, 18) = 2.147	0.1601	0.2967	F (1, 17) = 0.07239	0.7909	18.82	F (1, 17) = 4.591	0.0461

## Sheet: table S4
Plasma metabolite 13C-enrichment from infused glucose
	% of Metabolites with 13C-Enrichment								Results of 2-Way ANOVA Testing
	8-weeks Control diet				8-weeks High-fat diet
	vehicle		DEN		vehicle		DEN		interaction			diet			DEN
	Average	STDev	Average	STDev	Average	STDev	Average	STDev	eta2	F (DFn, DFd)	P value	eta2	F (DFn, DFd)	P value	eta2	F (DFn, DFd)	P value
6-phosphogluconate	58.6652	6.62309	73.729	11.2585	69.1213	11.8962	72.9868	6.5349	7.162	F (1, 17) = 1.781	0.1996	5.389	F (1, 17) = 1.340	0.263	20.47	F (1, 17) = 5.090	0.0375
AKG	31.044	3.345	50.179	13.495	29.242	6.106	38.113	4.291	5.329	F (1, 16) = 2.042	0.01723	9.727	F (1, 16) = 3.727	0.0715	39.67	F (1, 16) = 15.20	0.0013
alanine	1.15819	0.234725	1.07046	0.728153	2.08558	0.641766	3.64002	2.03268	9.354	F (1, 16) = 3.146	0.0952	42.42	F (1, 16) = 14.26	0.0017	7.462	F (1, 16) = 2.509	0.1327
aspartate	3.8191	0.634035	6.37727	1.81908	5.20372	1.13738	4.07929	0.373642	39.8	F (1, 16) = 12.23	0.003	2.449	F (1, 16) = 0.7521	0.3986	6.033	F (1, 16) = 1.853	0.1923
citrate	21.2297	2.69158	23.9182	7.35476	23.6083	2.05646	24.7406	2.91893	0.9145	F (1, 16) = 0.1625	0.6922	3.869	F (1, 16) = 0.6873	0.4193	5.513	F (1, 16) = 0.9793	0.3371
Dehydroxyacetone phosphate	32.4871	3.19708	30.1083	11.1635	35.1884	6.338	27.6474	8.58583	2.883	F (1, 17) = 0.5708	0.4603	0.006259	F (1, 17) = 0.001239	0.9723	10.65	F (1, 17) = 2.108	0.1647
fumarate	87.3844	4.44215	138.916	54.7512	74.284	7.02604	74.5046	4.21543	12.15	F (1, 16) = 4.170	0.058	27.73	F (1, 16) = 9.516	0.0071	12.36	F (1, 16) = 4.242	0.0561
glycerol-3-phosphate	36.3507	5.02634	25.6698	9.75459	49.1858	4.32479	46.1396	9.53443	2.789	F (1, 17) = 1.377	0.2568	53.07	F (1, 17) = 26.20	0.0001	9.016	F (1, 17) = 4.451	0.05
glycine	6.86925	2.3014	9.08922	1.26212	7.49229	1.77227	5.29328	0.763951	30.55	F (1, 16) = 8.499	0.0101	15.75	F (1, 16) = 4.382	0.0526	0.0006865	F (1, 16) = 0.0001910	0.9891
hexose-phosphates	52.287	5.05037	46.7992	16.5219	54.1418	10.1659	44.988	20.7438	0.4691	F (1, 17) = 0.08684	0.7718	6.646e-05	F (1, 17) = 1.230e-005	0.9972	7.483	F (1, 17) = 1.385	0.2554
lactate	67.799	5.05195	91.0409	11.123	84.3079	5.66228	76.162	3.85149	51.89	F (1, 16) = 24.07	0.0002	0.1399	F (1, 16) = 0.06493	0.8021	12	F (1, 16) = 5.569	0.0313
malate	24.6967	3.30645	23.0074	8.70317	31.8843	3.55234	31.4421	4.61727	0.2411	F (1, 16) = 0.06431	0.803	37.83	F (1, 16) = 10.09	0.0059	0.7043	F (1, 16) = 0.1879	0.6705
PEP	75.1757	7.63003	107.849	12.551	79.7893	11.5226	83.0794	8.70868	22.18	F (1, 17) = 10.46	0.0049	10.44	F (1, 17) = 4.922	0.0404	33.23	F (1, 17) = 15.67	0.001
proline	20.888	1.89923	30.688	13.1643	19.5317	2.63032	20.44	4.03303	8.023	F (1, 16) = 1.958	0.1808	13.66	F (1, 16) = 3.335	0.0865	11.64	F (1, 16) = 2.840	0.1113
pyruvate	69.3282	8.17435	99.7	41.5392	88.2204	8.99351	70.1674	9.3149	26.14	F (1, 16) = 5.864	0.0277	1.262	F (1, 16) = 0.2831	0.602	1.692	F (1, 16) = 0.3795	0.5465
ribulose-5-phosphate	14.1187	2.42469	16.8487	6.14454	13.8565	2.47113	12.2586	2.4282	8.626	F (1, 17) = 1.817	0.1954	10.84	F (1, 17) = 2.284	0.1491	0.59	F (1, 17) = 0.1243	0.7288
sedoheptulose-7-phosphate	22.0462	4.3148	20.2322	5.77209	23.0982	5.83127	17.4856	6.75919	2.867	F (1, 17) = 0.5708	0.4603	0.5706	F (1, 17) = 0.1136	0.7402	10.96	F (1, 17) = 2.182	0.1579
serine	8.87579	1.03245	13.6822	2.40552	14.2318	3.29582	11.2047	4.35625	32.17	F (1, 16) = 8.671	0.0095	4.344	F (1, 16) = 1.171	0.2953	1.66	F (1, 16) = 0.4474	0.5131
succinate	31.8039	6.44284	34.8052	5.6237	35.468	3.31826	31.9592	3.12181	12.02	F (1, 16) = 2.203	0.1571	0.18981	F (1, 16) = 0.03480	0.8544	0.07303	F (1, 16) = 0.01339	0.9093
D-Ribose-5-phosphate	12.9772	1.54651	16.068	5.11696	13.1753	1.75957	11.484	2.08624	14.74	F (1, 17) = 3.445	0.0809	12.4	F (1, 17) = 2.898	0.1069	1.263	F (1, 17) = 0.2950	0.5941
Plasma Mass Isotopomer MDVs measured in 13C-glucose infused mice
Diet (8 weeks)		CD	CD	CD	CD	CD	CD	CD	CD	CD	CD	HFD	HFD	HFD	HFD	HFD	HFD	HFD	HFD	HFD	HFD	HFD
Mouse		1	2	3	4	5	10	7	8	9	6	11	12	13	14	15	16	17	18	19	20	21
Injection at 2wks age		Vehicle	Vehicle	Vehicle	Vehicle	Vehicle	DEN	DEN	DEN	DEN	DEN	Vehicle	Vehicle	Vehicle	Vehicle	Vehicle	Vehicle	DEN	DEN	DEN	DEN	DEN
Plasma glucose enrichment		0.778336	0.803378	0.763418	0.76702	0.716005	0.593669	0.713548	0.30005	0.525404	0.497229	0.881941	0.807127	0.731179	0.735164	0.827794	0.760835	0.91813		0.787616	0.751414	0.902478
Dataset 1 - normalized to corresponding glucose measurement
AKG	M+0	0.453469	0.460002	0.476809	0.591046	0.463146	0.445698	0.439415	0.598488	0.51973	0.475287	0.444656	0.472075	0.785403	0.554027	0.390879	0.417177	0.36765	no labelling data for #18	0.406828	0.34416	0.316422
	M+1	0.152676	0.181535	0.176709	0.100409	0.151306	0.168078	0.146255	0.090035	0.142536	0.131175	0.151498	0.14411	0.00960221	0.135766	0.174926	0.180138	0.164989		0.164681	0.153492	0.153873
	M+2	0.172595	0.17514	0.171003	0.129126	0.168217	0.205173	0.178166	0.103605	0.133452	0.13363	0.182817	0.169916	0.0590807	0.1627	0.187519	0.184668	0.172401		0.193662	0.191061	0.212818
	M+3	0.106021	0.0994086	0.0936728	0.0908149	0.121622	0.0925682	0.123406	0.0905294	0.0934287	0.11895	0.120815	0.123704	0.0594307	0.0962498	0.14586	0.121294	0.15139		0.125308	0.167844	0.166175
	M+4	0.0779005	0.0507522	0.060464	0.0543774	0.0805502	0.0560012	0.0760952	0.0821827	0.0744909	0.0967336	0.0643635	0.0567267	0.0597699	0.0318598	0.0615524	0.0645646	0.0983751		0.0743453	0.0999856	0.103767
	M+5	0.0373392	0.033162	0.021342	0.0342276	0.015158	0.032481	0.0366629	0.0351602	0.0363626	0.0442244	0.03585	0.0334684	0.0267131	0.0193971	0.039263	0.0321577	0.0451946		0.0351762	0.0434588	0.0469459
Fractional Abundance		0.262845	0.239772	0.22966	0.20395	0.25012	0.248508	0.2721	0.214673	0.2339	0.272668	0.263256	0.249861	0.13574	0.194868	0.286014	0.266481	0.316687		0.280238	0.331276	0.345566
Blood glucose normalized (%)		33.7702	29.8455	30.0831	26.59	34.9327	41.8597	38.1334	71.5458	44.5182	54.8375	29.8497	30.9568	18.5646	26.5068	34.5514	35.0248	34.4926		35.5805	44.087	38.2908
alanine	M+0	0.990301	0.991879	0.987613	0.989854	0.990525	0.988862	0.987736	1.00146	0.993324	0.992934	0.983338	0.986739	0.980138	0.979973	0.989405	0.974946	0.993416		0.959691	0.969613	0.946632
	M+1	0.00161493	0.00227914	0.00145932	0.00272296	0.00163537	0.00151491	0.00180365	0	0.00204801	0.00179876	0.00166641	0.000586665	-2.78708e-05	0.00233786	0.000945248	0.0053298	0		0.00499628	0.00233089	0.00379894
	M+2	0	0	0	0	-3.64259e-07	0	3.02498e-05	0	-4.26473e-05	0.000418654	0.000417152	0	0	0.000748854	0	0.00239587	0		0.00321094	0.00144816	0.00476082
	M+3	0.00880272	0.00686866	0.0114648	0.00770572	0.00784037	0.0105142	0.01043	0.00163991	0.00467058	0.00484866	0.0145782	0.0131046	0.0201797	0.0169408	0.0101185	0.0173287	0.00781993		0.0321022	0.0266079	0.0448085
Fractional Abundance		0.00886175	0.0069438	0.0115933	0.00842468	0.00838525	0.0104252	0.0110514	-0.000353649	0.00532482	0.00572735	0.0154117	0.0130134	0.0199772	0.0182193	0.0101212	0.0207025	0.00707866		0.0359083	0.0283503	0.0492487
Blood glucose normalized (%)		1.13855	0.864326	1.5186	1.09837	1.17112	1.75606	1.54879	0	1.01347	1.15185	1.74748	1.61232	2.73219	2.47826	1.22267	2.72103	0.770987		4.55911	3.77292	5.45705
aspartate	M+0	0.928785	0.905388	0.909468	0.91773	0.889003	0.885076	0.88808	0.897672	0.897331	0.900193	0.89544	0.897104	0.846692	0.872898	0.854984	0.872792	0.880564		0.897374	0.915221	0.869716
	M+1	0.0587571	0.0731288	0.077427	0.0606711	0.0961515	0.0982928	0.103664	0.101669	0.0970013	0.0788761	0.0836897	0.0871593	0.1266	0.101012	0.113423	0.108062	0.101642		0.0853502	0.071222	0.106083
	M+2	0.00553834	0.0121833	0.00541481	0.0117535	0.00591135	0.00809443	0.00290578	0	0	0.0092881	0.00760656	0.00929164	0.00944222	0.0176706	0.0209597	0.0108344	0.00669565		0.00782619	0.00554757	0.0163247
	M+3	0.00592384	0.00667206	0.00565515	0.00859381	0.00880374	0.00838546	0.00389293	0.00454455	0.00356372	0.011303	0.0119032	0.00529213	0.0130434	0.00627465	0.00767313	0.00656095	0.00868864		0.00874055	0.0065196	0.00791265
	M+4	0.000995402	0.00262822	0.00203455	0.00125124	0.000130643	0.000151184	0.00145768	0.00204015	0.00246575	0.000339625	0.00136049	0.00115317	0.00422253	0.00214484	0.00296056	0.00175083	0.00241006		0.000708801	0.00148988	-3.65239e-05
Fractional Abundance		0.0228967	0.0320061	0.0283401	0.0287412	0.033727	0.0350607	0.0317462	0.0279029	0.0292078	0.0331799	0.0350136	0.0315579	0.0503763	0.0409391	0.0475509	0.0391043	0.0376848		0.0325149	0.0269589	0.0405812
Blood glucose normalized (%)		2.94175	3.98395	3.71226	3.74712	4.71044	5.90577	4.44906	9.29943	5.55911	6.67296	3.97006	3.90991	6.88973	5.56871	5.74429	5.13966	4.10451		4.12826	3.58775	4.49664
citrate	M+0	0.52136	0.480882	0.455197	0.583321	0.533084	0.422301	0.490288	0.819025	0.617765	0.672549	0.468871	0.500726	0.524297	0.505701	0.418358	0.451061	0.434576		0.502029	0.480448	0.352442
	M+1	0.193616	0.202005	0.205527	0.189602	0.19916	0.176374	0.199458	0.0930141	0.17164	0.156074	0.195068	0.177867	0.180399	0.191394	0.186048	0.200508	0.18212		0.179935	0.19226	0.180104
	M+2	0.149924	0.167499	0.176405	0.121998	0.144434	0.199051	0.172404	0.0542652	0.124561	0.104312	0.167829	0.154862	0.144422	0.153218	0.178848	0.171333	0.172135		0.161013	0.160851	0.196365
	M+3	0.0827091	0.0917305	0.0990337	0.0700068	0.0787737	0.12033	0.0925804	0.026816	0.0597959	0.0504482	0.100501	0.102541	0.0895689	0.0948944	0.122519	0.108979	0.12119		0.0980318	0.0991299	0.146237
	M+4	0.0376744	0.0422869	0.0471783	0.0273658	0.033335	0.0578973	0.0339362	0.00501325	0.020433	0.0138643	0.0486036	0.0476808	0.0432017	0.0407465	0.0651264	0.0499623	0.0628131		0.0433047	0.0473517	0.0825796
	M+5	0.010467	0.0107532	0.0119334	0.00569027	0.00835915	0.0188924	0.00920032	0.00119085	0.00458502	0.00208428	0.0140719	0.012383	0.0126874	0.0106357	0.0224176	0.014158	0.0206747		0.0119498	0.0149613	0.0310556
	M+6	0.0042493	0.00484371	0.00472473	0.00201608	0.00285452	0.0051537	0.00213248	0.000675887	0.00122114	0.0006677	0.00505509	0.00394053	0.00542402	0.0034104	0.00668306	0.00399922	0.00649118		0.00373671	0.00499743	0.0112171
Fractional Abundance		0.161687	0.177362	0.188695	0.132271	0.152769	0.215407	0.169425	0.0520092	0.118689	0.0976548	0.187889	0.178582	0.16779	0.169857	0.220665	0.194124	0.213922		0.175241	0.184258	0.260741
Blood glucose normalized (%)		20.7734	22.077	24.7171	17.2449	21.3362	36.284	23.744	17.3335	22.59	19.6398	21.3041	22.1257	22.9478	23.1046	26.6571	25.5146	23.2998		22.2495	24.5216	28.8916
fumarate	M+0	0.0523293	0.0981369	0.113917	0.0841093	0.0878262	0.078204	0.178236	0.0823188	0.0727018	0.0549471	0.125773	0.160187	0.296865	0.1637	0.0949223	0.137914	0.0805134		0.17175	0.128199	0.0820319
	M+1	0.0170488	0.0326777	0.0346693	0.0227327	0.0325032	0.0323047	0.061068	0.00579958	0.0121974	0.0115279	0.0561948	0.0540807	0.0938349	0.0613412	0.0445011	0.0655783	0.0307561		0.071704	0.0591488	0.0433472
	M+2	0.0196303	0.0276387	0.0292515	0.0156563	0.0207139	0.028653	0.035383	0.0116863	0.0178029	0.0164317	0.04571	0.0399975	0.149908	0.0496731	0.0400873	0.0505043	0.0229179		0.105379	0.0777973	0.0596906
	M+3	0.899029	0.827623	0.804547	0.868824	0.847178	0.843079	0.71068	0.892503	0.888365	0.906985	0.74926	0.724934	0.412078	0.7055	0.793659	0.720526	0.852233		0.638713	0.727986	0.79629
	M+4	0.0119621	0.0139235	0.0176156	0.00867743	0.0117786	0.0177592	0.0146329	0.00769194	0.0089324	0.0101081	0.0230627	0.0208007	0.0473144	0.0197853	0.0268308	0.0254782	0.0135791		0.0124537	0.00686875	0.0186398
Fractional Abundance		0.700312	0.65663	0.644319	0.673807	0.665645	0.672471	0.580601	0.684363	0.687157	0.701445	0.621911	0.598021	0.454785	0.589082	0.653244	0.607519	0.671902		0.562104	0.606544	0.65654
Blood glucose normalized (%)		89.9755	81.7336	84.3992	87.8474	92.9665	113.274	81.3682	228.083	130.786	141.071	70.5162	74.0925	62.1989	80.1294	78.9138	79.849	73.1816		71.3678	80.7204	72.7485
gluc ose	M+0	0.0992131	0.0869214	0.106716	0.112569	0.129234	0.185623	0.127762	0.491904	0.250692	0.300241	0.0444659	0.0772955	0.113561	0.0961489	0.0584554	0.0777657	0.0182137		0.0743509	0.100591	0.0230073
	M+1	0.0496313	0.0395343	0.0483821	0.0541237	0.0645482	0.0856276	0.0604411	0.10345	0.104778	0.095328	0.0228233	0.0411145	0.0564305	0.0535056	0.0363108	0.0499282	0.0112101		0.0439903	0.0512889	0.0171442
	M+2	0.0478885	0.040065	0.0491911	0.0425214	0.0592571	0.092633	0.057443	0.0931127	0.0908309	0.0876985	0.027229	0.0420877	0.0594498	0.0586122	0.0369878	0.0587874	0.0143256		0.0472475	0.0524218	0.0223716
	M+3	0.0616509	0.0622513	0.0728922	0.0599807	0.0829062	0.12521	0.094632	0.0986783	0.115245	0.0978165	0.037633	0.066926	0.0917519	0.113499	0.0729326	0.1042	0.0457565		0.0914396	0.0952874	0.0463626
	M+4	0.0250822	0.0264881	0.0312102	0.0236394	0.0314126	0.0468045	0.038073	0.0212048	0.0346382	0.0274745	0.0197809	0.0268738	0.0367141	0.0512813	0.0333032	0.0493481	0.0276067		0.0387056	0.0373477	0.0295673
	M+5	0.0598774	0.0605437	0.0594272	0.05454	0.0572561	0.0563397	0.0601223	0.0201348	0.0411947	0.0393459	0.0660676	0.0650175	0.0629286	0.0670877	0.067597	0.0723114	0.0761029		0.0675266	0.061278	0.0736566
	M+6	0.656657	0.684196	0.632182	0.652625	0.575386	0.407762	0.561527	0.171516	0.362621	0.352096	0.782	0.680685	0.579164	0.559865	0.694413	0.587659	0.806784		0.636739	0.601785	0.78789
Fractional Abundance		0.778336	0.803378	0.763418	0.76702	0.716005	0.593669	0.713548	0.30005	0.525404	0.497229	0.881941	0.807127	0.731179	0.735164	0.827794	0.760835	0.91813		0.787616	0.751414	0.902478
glycine	M+0	0.908974	0.904626	0.95233	0.955459	0.938648	0.916464	0.932375	0.974391	0.947775	0.945105	0.922612	0.928548	0.951666	0.932211	0.920134	0.894814	0.94197		0.945769	0.945925	0.954886
	M+1	0.0359118	0.0422634	0.0162107	0.0203464	0.0360151	0.0338869	0.0204993	0.000414731	0.0150685	0.018137	0.0329916	0.0323425	0.0231918	0.0211912	0.0275626	0.0519174	0.0137866		0.0198426	0.0206981	0.0151664
	M+2	0.0551146	0.0531104	0.0314595	0.0241946	0.0253372	0.0496489	0.0471258	0.0251945	0.0371562	0.0367579	0.0443965	0.0391097	0.0251426	0.0465978	0.0523035	0.0532683	0.0442432		0.0343881	0.0333765	0.0299474
Fractional Abundance		0.0730705	0.0742421	0.0395649	0.0343678	0.0433447	0.0665923	0.0573755	0.0254018	0.0446905	0.0458263	0.0608923	0.055281	0.0367385	0.0571934	0.0660848	0.079227	0.0511365		0.0443094	0.0437256	0.0375306
Blood glucose normalized (%)		9.38805	9.24125	5.1826	4.48069	6.05369	11.2171	8.04087	8.46588	8.50592	9.21634	6.90436	6.84911	5.02455	7.77969	7.98325	10.4132	5.56964		5.62576	5.8191	4.15862
lactate	M+0	0.338489	0.419256	0.452024	0.433597	0.476764	0.504822	0.333669	0.641033	0.393176	0.418705	0.257222	0.278753	0.294721	0.336219	0.27574	0.240591	0.278329		0.330202	0.368694	0.217656
	M+1	0.0615017	0.0545361	0.0480945	0.0583898	0.0560783	0.043028	0.0750225	0.0708743	0.0866176	0.0821966	0.0463844	0.0466388	0.0446737	0.0487624	0.0674027	0.0535574	0.0678946		0.0609786	0.0519686	0.0538153
	M+2	0.0681233	0.0564672	0.0522529	0.0577407	0.0567829	0.0486964	0.0809365	0.062468	0.0790068	0.0829433	0.0578771	0.0575509	0.0560007	0.0586801	0.0800087	0.0642545	0.077855		0.06899	0.0592015	0.0717308
	M+3	0.531886	0.469741	0.447628	0.450273	0.410375	0.403454	0.510372	0.225625	0.4412	0.416155	0.638516	0.617057	0.604604	0.556338	0.576848	0.641597	0.575922		0.539829	0.520136	0.656798
Fractional Abundance		0.597802	0.525565	0.498495	0.50823	0.466923	0.45026	0.589337	0.290895	0.522743	0.498849	0.692562	0.67097	0.656829	0.611712	0.652655	0.702286	0.650456		0.606149	0.576927	0.722557
Blood glucose normalized (%)		76.8052	65.4194	65.2978	66.2603	65.2123	75.8437	82.5926	96.9489	99.4935	100.326	78.5271	83.1307	89.8316	83.2077	78.8427	92.3046	70.8458		76.9599	76.7788	80.0636
malate	M+0	0.572296	0.555052	0.561946	0.677004	0.577854	0.514718	0.627087	0.87925	0.752506	0.772581	0.482025	0.534198	0.527096	0.545965	0.426739	0.457557	0.516738		0.500182	0.487824	0.389978
	M+1	0.188039	0.208868	0.19786	0.154571	0.195091	0.213458	0.186408	0.0690323	0.137379	0.126355	0.206291	0.182736	0.187398	0.192892	0.203522	0.211594	0.200366		0.20926	0.210321	0.192378
	M+2	0.127642	0.134115	0.138975	0.0949928	0.128005	0.154925	0.105996	0.0328941	0.0725264	0.0641317	0.163093	0.144992	0.154645	0.139574	0.163561	0.168761	0.143255		0.16404	0.160719	0.192137
	M+3	0.0811045	0.0762334	0.0737419	0.058428	0.0750164	0.089792	0.0633857	0.0161171	0.0301136	0.0295148	0.10455	0.0994324	0.0944648	0.0899332	0.134373	0.113971	0.0967649		0.0941648	0.102665	0.152133
	M+4	0.0309189	0.0257313	0.0274775	0.0150037	0.0240342	0.0271066	0.0171237	0.00270655	0.00747486	0.00741822	0.0440413	0.0386419	0.0363966	0.0316356	0.0718046	0.0481174	0.0428754		0.0323531	0.0384718	0.073374
Fractional Abundance		0.202578	0.202181	0.201736	0.144964	0.193072	0.225277	0.164263	0.0484995	0.100668	0.0932088	0.255573	0.231396	0.231417	0.217096	0.305245	0.270875	0.237168		0.237312	0.24841	0.331637
Blood glucose normalized (%)		26.027	25.1664	26.4254	18.8996	26.9651	37.9466	23.0206	16.1638	19.1601	18.7456	28.9785	28.6691	31.6499	29.5302	36.8746	35.6023	25.8317		30.1304	33.059	36.7473
proline	M+0	0.577191	0.572453	0.623629	0.663613	0.60266	0.663217	0.701995	0.612149	0.597779	0.626585	0.597989	0.661854	0.672769	0.688541	0.555731	0.566231	0.451346		0.620575	0.578064	0.672691
	M+1	0.010406	0.0147328	0.0203003	0.0118863	0.015662	0.0148914	0.0170165	0.00790181	0.00799245	0.0126249	0.0246337	0.0150079	0.0201847	0.0237976	0.026238	0.0206472	0.00925856		0.024562	0.0247138	0.0122723
	M+2	0.39053	0.387204	0.330515	0.303148	0.360081	0.297382	0.260053	0.36896	0.378462	0.3448	0.343391	0.298295	0.281173	0.256157	0.379688	0.377123	0.517573		0.326983	0.369325	0.284544
	M+3	0.0166623	0.0201874	0.0194808	0.0164301	0.017548	0.0190199	0.0158068	0.0111008	0.0141771	0.0143117	0.0252866	0.0181275	0.0198608	0.0241117	0.029509	0.0254614	0.0172986		0.0227981	0.0220981	0.0211987
	M+4	0.00398097	0.00361719	0.0042559	0.00390799	0.00267831	0.00375234	0.00381755	0	0.000835964	0.00130244	0.00618801	0.00528988	0.00393716	0.00518771	0.00611419	0.00810899	0.00337317		0.00347646	0.00372785	0.00641199
	M+5	0.00122967	0.00180555	0.00181943	0.00101478	0.00137084	0.00173722	0.00131174	0.000137724	0.000753474	0.000375809	0.002512	0.0014261	0.00207513	0.00220491	0.00272025	0.0024293	0.0011506		0.00160543	0.00207214	0.00288188
Fractional Abundance		0.172705	0.17464	0.153179	0.137636	0.161207	0.138082	0.121274	0.155763	0.162912	0.15045	0.164918	0.138854	0.133648	0.128044	0.18244	0.179172	0.223109		0.153771	0.170986	0.137003
Blood glucose normalized (%)		22.189	21.7382	20.0649	17.9442	22.5148	23.2591	16.9959	51.9124	31.0069	30.2576	18.6994	17.2035	18.2784	17.4171	22.0393	23.5494	24.3004		19.5236	22.7552	15.1807
pyruvate	M+0	0.408385	0.399348	0.4551	0.427291	0.325727	0.60366	0.445007	0.425188	0.396251	0.273103	0.251252	0.309952	0.244253	0.231438	0.238438	0.209115	0.362993		0.357056	0.393921	0.221791
	M+1	0.0779549	0.0567618	0.0535235	0.0658932	0.0717682	0.0617388	0.103302	0.113164	0.0906032	0.0571735	0.0501874	0.0539779	0.0330632	0.0347819	0.0540587	0.0872159	0.0798816		0.0670184	0.0622385	0.0581333
	M+2	0.0876213	0.0659125	0.060875	0.0700955	0.0792069	0.0680919	0.110462	0.13459	0.0946708	0.117579	0.0686616	0.0652111	0.0488596	0.0761617	0.0649754	0.112316	0.182535		0.0833304	0.0609979	0.0834618
	M+3	0.426039	0.477978	0.430501	0.43672	0.523298	0.266509	0.341229	0.327058	0.418475	0.552144	0.629899	0.570859	0.673824	0.657618	0.642528	0.591353	0.37459		0.492595	0.482842	0.636614
Fractional Abundance		0.510438	0.54084	0.488926	0.505415	0.600026	0.332483	0.449305	0.454506	0.51179	0.649588	0.692402	0.632326	0.717418	0.719987	0.703864	0.695302	0.522907		0.570488	0.544254	0.711633
Blood glucose normalized (%)		65.5806	67.3208	64.0443	65.8933	83.8019	56.0048	62.9677	151.477	97.4088	130.642	78.509	78.3429	98.118	97.9356	85.029	91.3868	56.9535		72.4323	72.4306	78.8532
serine	M+0	0.904046	0.873247	0.890614	0.877734	0.889999	0.878252	0.848613	0.926966	0.838314	0.894774	0.825239	0.861035	0.822423	0.817143	0.775379	0.782952	0.893843		0.902139	0.789183	0.796927
	M+1	0.0520707	0.0644044	0.0368434	0.079306	0.0564855	0.0674438	0.0632894	0.036107	0.0975955	0.0695241	0.0909447	0.0671418	0.0912975	0.107175	0.117911	0.0880641	0.0650132		0.0303237	0.108486	0.0799136
	M+2	0.00733461	0.0215639	0.0240555	0.0219002	0.0209119	0.0166303	0.0438871	0.00617787	0.02791	0.0139363	0.0365309	0.0332224	0.0493555	0.0168193	0.0451456	0.0274945	0.0236069		0.00927237	0.0595444	0.0817541
	M+3	0.0365482	0.0407849	0.0484866	0.0210595	0.032604	0.0376743	0.0442101	0.0307495	0.0361809	0.0217654	0.0472851	0.0386004	0.036924	0.0588624	0.0615645	0.10149	0.0175369		0.058265	0.0427865	0.0414048
Fractional Abundance		0.0587949	0.0766289	0.0768048	0.062095	0.0653737	0.0712424	0.0945647	0.0469037	0.0873194	0.0542309	0.101954	0.0831293	0.10026	0.1058	0.130965	0.149174	0.0549459		0.0745544	0.118645	0.122545
Blood glucose normalized (%)		7.55392	9.53835	10.0607	8.09561	9.13035	12.0004	13.2527	15.632	16.6195	10.9066	11.5602	10.2994	13.7121	14.3914	15.821	19.6066	5.98455		9.46584	15.7895	13.5788
succinate	M+0	0.505393	0.448918	0.460919	0.650748	0.457774	0.517473	0.555507	0.759911	0.645554	0.701316	0.43874	0.463527	0.428068	0.474412	0.395316	0.452457	0.489691		0.454789	0.472002	0.38858
	M+1	0.180146	0.211414	0.204853	0.154567	0.209538	0.212721	0.191774	0.0682212	0.129648	0.102478	0.21835	0.190313	0.203734	0.201739	0.18642	0.2099	0.190346		0.2172	0.207765	0.209307
	M+2	0.173395	0.190502	0.184439	0.118201	0.183932	0.159764	0.128367	0.0923807	0.131151	0.118469	0.201392	0.191936	0.200111	0.184653	0.219937	0.204502	0.188568		0.200999	0.192593	0.241554
	M+3	0.0955085	0.102271	0.101741	0.0582678	0.103424	0.085689	0.0943497	0.0516724	0.0630116	0.0515147	0.0983138	0.104031	0.113408	0.101376	0.133283	0.0938228	0.0892815		0.0921442	0.0923157	0.107065
	M+4	0.0455567	0.0468955	0.0480491	0.018216	0.0453316	0.0243533	0.0300029	0.0278147	0.0306349	0.0262225	0.0432046	0.050193	0.0546787	0.037821	0.0650451	0.0393179	0.0421135		0.0348672	0.0353239	0.0534948
Fractional Abundance		0.248922	0.271703	0.267787	0.159659	0.26725	0.221682	0.212892	0.129815	0.175881	0.149712	0.272223	0.271763	0.290724	0.256614	0.321581	0.264411	0.250945		0.258775	0.252798	0.306897
Blood glucose normalized (%)		31.9813	33.8201	35.0774	20.8155	37.3251	37.341	29.8357	43.2644	33.4754	30.1093	30.8664	33.6704	39.761	34.9057	38.8479	34.7528	27.3322		32.8555	33.643	34.006
Diet		control	control	control	control	control	control	control	control	control	control	HFD	HFD	HFD	HFD	HFD	HFD	HFD	HFD	HFD	HFD	HFD
Mouse		1	2	3	4	5	6	7	8	9	10	11	12	13	14	15	16	17	18	19	20	21
Injection at 2wks age		PBS	PBS	PBS	PBS	PBS	DEN	DEN	DEN	DEN	DEN	PBS	PBS	PBS	PBS	PBS	PBS	DEN	DEN	DEN	DEN	DEN
Plasma glucose enrichment		0.78233	0.8104	0.766331	0.777164	0.723497	0.60589	0.72737	0.334321	0.561366	0.541146	0.818741	0.869775	0.81225	0.745475	0.745362	0.827244	0.766559	0.899797	0.785215	0.751982	0.884649
Dataset 2 - normalized to corresponding glucose measurement
6-phosphogluconic acid	M+0	0.350637	0.416038	0.520283	0.483461	0.383122	0.41874	0.358482	0.513383	0.325021	0.344845	0.339358	0.434935	0.388097	0.380264	0.167347	0.234643	0.252776	0.152246	0.292174	0.426765	0.164568
	M+1	0.039393	0.0228021	0.00226332	0.0411337	0.0507922	0.0570618	0.0504146	0.092653	0.0664121	0.0797347	0.0130019	0.0157326	0.0143594	0.0327524	0.0430417	0.0240627	0.041926	0.0314852	0.039341	0.0159877	0.0240202
	M+2	0.0270672	0.0212249	0.0143733	0.0224092	0.0471876	0.058624	0.0427833	0.0749076	0.0564988	0.0669118	0.0112461	0.017181	0.015578	0.0311367	0.0476985	0.0238029	0.0389441	0.0224089	0.0363639	0.0201204	0.0292245
	M+3	0.123659	0.143003	0.105122	0.113245	0.146138	0.190189	0.222656	0.13551	0.191047	0.21777	0.147174	0.135495	0.133677	0.134609	0.171072	0.135338	0.152396	0.157125	0.168647	0.123	0.177547
	M+4	0.018044	0.0170509	0	0.0210692	0.0195354	0.0365831	0.035477	0.0152748	0.042536	0.0334013	0.0180161	0.014668	0.0157087	0.0254667	0.05569	0.0304862	0.0438979	0.0339027	0.0323637	0.0181476	0.0445046
	M+5	0.0280441	0.0323513	0.0233642	0.0327338	0.0315081	0.0355752	0.0405339	0.0198773	0.0397126	0.0325842	0.0357861	0.0344334	0.0318307	0.0405682	0.0639435	0.0535624	0.0481077	0.0655352	0.044731	0.0337381	0.0618936
	M+6	0.413156	0.347529	0.334594	0.285948	0.321717	0.203226	0.249654	0.148394	0.278772	0.224753	0.435417	0.347555	0.40075	0.355203	0.451207	0.498105	0.421953	0.537297	0.386379	0.362241	0.498242
Fractional Abundance		0.525972	0.468233	0.411794	0.39822	0.458261	0.381407	0.441075	0.283309	0.465648	0.418652	0.556752	0.462125	0.512172	0.48913	0.650229	0.642678	0.587475	0.705791	0.548232	0.473326	0.682008
Blood glucose normalized (%)		67.2315	57.778	53.7357	51.2402	63.3397	62.9499	60.6397	84.7416	82.9491	77.3639	68.0011	53.1315	63.0559	65.6132	87.2367	77.6891	76.6379	78.4389	69.8194	62.9438	77.0936
D-ribose-5-phosphate	M+0	0.820551	0.844436	0.846493	0.816768	0.805488	0.880504	0.727754	0.922818	0.830827	0.775464	0.805092	0.847833	0.846286	0.804974	0.8377	0.811626	0.891722	0.817588	0.831972	0.837355	0.820911
	M+1	0.0194169	0.013035	0.015291	0.0220276	0.0256157	0.0187184	0.0276916	0.0181073	0.022303	0.0297525	0.0130051	0.0127471	0.0104212	0.0202315	0.0153982	0.0133015	0.0113351	0.0117863	0.0161259	0.0129966	0.0114112
	M+2	0.017046	0.0136418	0.0155692	0.0264274	0.0270605	0.016445	0.0478373	0.00345856	0.0200314	0.0342042	0.0205356	0.0187258	0.0133543	0.0279422	0.0159517	0.0210189	0.00713185	0.0193618	0.0189084	0.0167053	0.0168906
	M+3	0.119445	0.109341	0.106699	0.109996	0.117119	0.0791177	0.186586	0.0547012	0.11854	0.151582	0.12786	0.0895512	0.0970281	0.113303	0.118441	0.122772	0.0854642	0.141607	0.114252	0.10429	0.124395
	M+4	0.00570811	0.00405585	0.00426917	0.00697774	0.00737599	0.00133278	0.00147824	0.00048701	0.00217873	0.00268607	0.00735944	0.00684146	0.00598192	0.00839158	0.00264883	0.00681614	0.00109078	0.00171891	0.00428679	0.00546529	0.00529902
	M+5	0.0178331	0.0154903	0.0116788	0.0178037	0.0173414	0.00388191	0.00865286	0.000427898	0.00611945	0.00631152	0.0261478	0.0243013	0.0269282	0.025158	0.00986029	0.0244655	0.0032562	0.00793717	0.0144555	0.023188	0.0210927
Fractional Abundance		0.104768	0.0924032	0.0883992	0.10436	0.109461	0.0627404	0.14646	0.0386431	0.0914596	0.119042	0.119567	0.093545	0.0973566	0.115076	0.0925041	0.11465	0.0605271	0.104379	0.0972245	0.0994155	0.109008
Blood glucose normalized (%)		13.3918	11.4022	11.5354	13.4283	15.1294	10.3551	20.1356	11.5587	16.2923	21.9981	14.6037	10.7551	11.986	15.4366	12.4106	13.8592	7.89595	11.6003	12.3819	13.2205	12.3221
D-sedoheptulose-7-phosphate	M+0	0.61892	0.672556	0.710469	0.555547	0.598825	0.779232	0.542097	0.831052	0.717701	0.629734	0.593607	0.632384	0.617638	0.520057	0.725966	0.580792	0.830827	0.717344	0.644644	0.636356	0.577684
	M+1	0.0322261	0.0313812	0.0239865	0.0584012	0.0509689	0.0564185	0.089156	0.0463774	0.0433905	0.058473	0.0305994	0.0413333	0.0296329	0.0492818	0.0372802	0.0271041	0.0248505	0.0372308	0.0423293	0.0333517	0.0326324
	M+2	0.0794134	0.0631057	0.0636513	0.0966746	0.0926497	0.044189	0.0777639	0.0346426	0.0633124	0.080079	0.0756098	0.0773945	0.067256	0.0958766	0.0552899	0.0845714	0.0304516	0.0491855	0.0704721	0.076023	0.0706546
	M+3	0.135678	0.149969	0.133785	0.135222	0.139145	0.102934	0.21675	0.0740749	0.134274	0.175004	0.174549	0.154246	0.156136	0.151072	0.136187	0.155736	0.103875	0.162294	0.155317	0.139902	0.183187
	M+4	0.0492428	0.0312111	0.028126	0.0644152	0.0459941	0.0093356	0.0352546	0.00785795	0.0155733	0.0251628	0.0436294	0.0367068	0.048533	0.0676022	0.0153827	0.0427188	0.00419247	0.0129307	0.0303347	0.0408147	0.0390745
	M+5	0.0340773	0.0225033	0.0195628	0.036933	0.0342985	0.00501187	0.0165285	0.00406672	0.015457	0.0160219	0.0320199	0.0275572	0.030091	0.0417131	0.0175598	0.0394733	0.00479583	0.0109833	0.0254473	0.031883	0.0328195
	M+6	0.0180528	0.0132448	0.00880763	0.0195404	0.0181292	0.00287883	0.0188849	0.00171558	0.00648364	0.0121904	0.018668	0.0147524	0.0186644	0.0275541	0.00702219	0.0229893	0.00100792	0.00834157	0.0150337	0.0153297	0.0271294
	M+7	0.0323893	0.0160287	0.0116126	0.0332662	0.0199891	0	0.00356442	0.000213024	0.00380912	0.00333478	0.0313179	0.0156255	0.0320483	0.0468438	0.00531206	0.0466155	0	0.00169078	0.0164224	0.0263404	0.036819
Fractional Abundance		0.185784	0.148076	0.128156	0.207121	0.179696	0.0761821	0.179551	0.0573482	0.11114	0.145841	0.195902	0.163052	0.187638	0.238065	0.112153	0.213706	0.0634536	0.113001	0.157565	0.17202	0.209201
Blood glucose normalized (%)		23.7475	18.2719	16.7234	26.6509	24.8372	12.5736	24.6849	17.1536	19.7981	26.9504	23.9273	18.7465	23.101	31.9347	15.0467	25.8335	8.27772	12.5585	20.0665	22.8755	23.6479
gluc ose	M+0	0.0845	0.069	0.0928	0.0972	0.1151	0.1645	0.1046	0.4484	0.2215	0.2438	0.0533	0.0354	0.0607	0.0916	0.0734	0.0476	0.0638	0.0157	0.0662	0.0854	0.0182
	M+1	0.0447	0.0346	0.0425	0.0439	0.0559	0.0863	0.0556	0.1008	0.0917	0.0848	0.0328	0.0207	0.0351	0.0566	0.0556	0.0315	0.0478	0.0123	0.04	0.05	0.0194
	M+2	0.0322	0.0296	0.0429	0.0377	0.0562	0.0819	0.0547	0.0872	0.0758	0.0741	0.0363	0.018	0.035	0.0479	0.057	0.0339	0.0554	0.0155	0.0435	0.0497	0.0177
	M+3	0.0593	0.0549	0.0706	0.0515	0.0643	0.1142	0.0882	0.084	0.1029	0.094	0.0661	0.0427	0.0618	0.0834	0.0947	0.0626	0.0922	0.0424	0.0813	0.0853	0.0501
	M+4	0.0712	0.0811	0.0742	0.0693	0.0708	0.0844	0.083	0.0346	0.064	0.0515	0.0769	0.0796	0.0795	0.0746	0.0847	0.0844	0.0857	0.0762	0.0811	0.0802	0.0774
	M+5	0.0939	0.0987	0.0925	0.0856	0.0903	0.0802	0.0798	0.0458	0.0644	0.077	0.1008	0.1006	0.0944	0.0866	0.0989	0.0973	0.1	0.1047	0.1011	0.099	0.1053
	M+6	0.5893	0.6263	0.5785	0.6112	0.5237	0.3771	0.5335	0.1782	0.3645	0.3356	0.6286	0.6959	0.6264	0.5482	0.5167	0.6389	0.5485	0.7345	0.5788	0.5426	0.7051
Fractional Abundance		0.78233	0.8104	0.766331	0.777164	0.723497	0.60589	0.72737	0.334321	0.561366	0.541146	0.818741	0.869775	0.81225	0.745475	0.745362	0.827244	0.766559	0.899797	0.785215	0.751982	0.884649
Hexpose phosphates	M+0	0.369049	0.404269	0.474118	0.446726	0.373273	0.697096	0.467421	0.600138	0.436244	0.412642	0.335766	0.418645	0.362927	0.354979	0.51134	0.269588	0.719327	0.527917	0.340026	0.395437	0.210175
	M+1	0.0451406	0.0351783	0.0384142	0.0496966	0.0614908	0.0653867	0.0821167	0.0881195	0.0718817	0.0850042	0.0299569	0.0344675	0.0265426	0.0423761	0.0536647	0.0365401	0.0459379	0.0506534	0.0494319	0.0324587	0.0332982
	M+2	0.0428725	0.0327842	0.0331596	0.0423924	0.0593374	0.045798	0.0608192	0.0681744	0.0616768	0.0721092	0.0344267	0.0355538	0.0269817	0.0449604	0.0486366	0.041018	0.0319227	0.0432103	0.0465873	0.0326566	0.0386723
	M+3	0.19371	0.22376	0.207291	0.181256	0.202101	0.15715	0.284171	0.155237	0.231896	0.272141	0.252628	0.25523	0.227849	0.211093	0.216563	0.230048	0.165278	0.268318	0.263642	0.211825	0.265864
	M+4	0.0347104	0.027737	0.0253996	0.0325527	0.0428961	0.0103176	0.0297701	0.0211292	0.038964	0.0421157	0.0318255	0.0254215	0.0254694	0.0359059	0.033425	0.044088	0.0112218	0.0221508	0.0380058	0.0288795	0.0491151
	M+5	0.0353687	0.0288443	0.0238396	0.0306309	0.0370728	0.00527618	0.0166802	0.0125955	0.0268457	0.0268544	0.0344166	0.0252464	0.0327069	0.0368814	0.0229509	0.045523	0.00487878	0.0140421	0.0344106	0.0336662	0.0517808
	M+6	0.279149	0.247427	0.197778	0.216745	0.223828	0.0189757	0.0590216	0.0546062	0.132491	0.0891333	0.280981	0.205436	0.297523	0.273805	0.11342	0.333195	0.0214335	0.0737078	0.227897	0.265077	0.351095
Fractional Abundance		0.450433	0.418626	0.355679	0.377014	0.414398	0.134989	0.268813	0.194219	0.329326	0.313863	0.473661	0.388633	0.469101	0.456072	0.288267	0.535309	0.133916	0.257182	0.437498	0.434593	0.578361
Blood glucose normalized (%)		57.5758	51.6567	46.4132	48.5115	57.2771	22.2795	36.9569	58.0935	58.6651	57.9997	57.8523	44.682	57.7532	61.1788	38.6747	64.71	17.4698	28.5822	55.717	57.793	65.3775
Glycerol-3-phosphate	M+0	0.670852	0.639231	0.765313	0.683037	0.681954	0.728174	0.764266	0.908916	0.870177	0.910363	0.579912	0.512285	0.605007	0.553581	0.651991	0.532255	0.722154	0.610231	0.594406	0.596927	0.446862
	M+1	0.0331148	0.028401	0.0238711	0.0420693	0.0464417	0.0301113	0.0265844	0.0164255	0.019869	0.0147458	0.029408	0.0337813	0.0201767	0.0473471	0.0305082	0.0322691	0.0241231	0.018203	0.0367069	0.0274523	0.0293419
	M+2	0.0236627	0.0213142	0.0120571	0.0280313	0.0319162	0.022423	0.014705	0.00381123	0.00411301	0.00205215	0.0277206	0.0334029	0.0204578	0.0453886	0.0273682	0.0324774	0.0160066	0.0197177	0.0342233	0.0255894	0.0378282
	M+3	0.27237	0.311054	0.198759	0.246862	0.239688	0.219292	0.194445	0.0708478	0.105841	0.0728395	0.36296	0.420531	0.354358	0.353683	0.290132	0.402999	0.237716	0.351849	0.334664	0.350032	0.485968
Fractional Abundance		0.299184	0.33473	0.214754	0.279573	0.276446	0.244278	0.21311	0.0788637	0.115206	0.0791228	0.391243	0.45406	0.374722	0.399724	0.318547	0.435407	0.256428	0.371061	0.369715	0.376242	0.520967
Blood glucose normalized (%)		38.2426	41.3043	28.0236	35.9734	38.2097	40.3172	29.2987	23.5892	20.5224	14.6213	47.7859	52.2043	46.1339	53.6201	42.7372	52.6334	33.4518	41.2383	47.0845	50.0334	58.8897
D-ribulose-5-phosphate	M+0	0.800712	0.833581	0.847479	0.778201	0.783977	0.887335	0.713451	0.918173	0.834253	0.743675	0.769578	0.844607	0.814139	0.784739	0.850443	0.819166	0.887309	0.805114	0.817936	0.820427	0.804286
	M+1	0.0198728	0.0127733	0.0173086	0.0255504	0.0258077	0.0171107	0.0284114	0.0181727	0.0176452	0.0370643	0.0173038	0.0139771	0.0219489	0.0281028	0.0136191	0.00694771	0.0133174	0.0121565	0.0167663	0.0159481	0.0184983
	M+2	0.0259393	0.0175566	0.0183003	0.032772	0.0262862	0.0133954	0.0530602	0.00572327	0.0194332	0.0408595	0.0233104	0.0163243	0.0137266	0.0258959	0.0130937	0.0194365	0.00753706	0.0242356	0.0190168	0.0182022	0.0158227
	M+3	0.130219	0.118247	0.102786	0.142644	0.141881	0.0778778	0.195039	0.0566986	0.121386	0.169088	0.158201	0.0955017	0.113744	0.132807	0.112246	0.127645	0.0878216	0.149172	0.127986	0.117271	0.136035
	M+4	0.00606592	0.00451322	0.00323205	0.00514646	0.00619972	0.000634543	0.00213019	0.000495543	0.00135273	0.0025613	0.00620244	0.00673235	0.00606048	0.00632545	0.00252132	0.00545367	0.000786781	0.00146424	0.00380392	0.00533096	0.0048331
	M+5	0.0171914	0.0133282	0.010894	0.0156862	0.0158494	0.003647	0.00790783	0.00073695	0.00593018	0.00675284	0.0254039	0.022858	0.0303803	0.0221293	0.00807691	0.0213513	0.00322872	0.00785756	0.0144907	0.0228211	0.0205253
Fractional Abundance		0.114526	0.0974645	0.0859331	0.123608	0.121613	0.0596616	0.153542	0.0410764	0.0911462	0.134011	0.138072	0.09487	0.113356	0.122853	0.0854027	0.111465	0.0622294	0.110657	0.105285	0.107919	0.116042
Blood glucose normalized (%)		14.639	12.0267	11.2136	15.9051	16.8091	9.84692	21.1092	12.2865	16.2365	24.7643	16.8639	10.9074	13.9558	16.4798	11.4579	13.4743	8.11801	12.298	13.4085	14.3512	13.1172
DHAP	M+0	0.702613	0.75061	0.778012	0.718758	0.740702	0.902014	0.766772	0.90833	0.80142	0.726028	0.66408	0.745281	0.67774	0.693858	0.798967	0.664779	0.871041	0.800146	0.756175	0.72437	0.676537
	M+1	0.0129861	0.00532047	0.00657859	0.017203	0.0171687	0.00820909	0.00282244	0.0123621	0.0175206	0.0295257	0.00643895	0.00658433	0.00775398	0.013149	0.0101301	0.0113675	0.00903255	0.00493499	0.01148	0.00413217	0.0131516
	M+2	0.0194671	0.00602965	0.00263672	0.0158932	0.0064836	0	0	0	0.00708589	0.0219408	0.0149785	0.00825108	0.0107826	0.0124467	0.00736649	0.012449	0	0.00311195	0.0106753	0.0116086	0.0132772
	M+3	0.264933	0.23804	0.212773	0.248146	0.235646	0.0897767	0.230405	0.0793077	0.173973	0.222505	0.314503	0.239883	0.303724	0.280546	0.183536	0.311404	0.119927	0.191807	0.221669	0.259889	0.297034
Fractional Abundance		0.28224	0.243833	0.216724	0.264476	0.245691	0.0925131	0.231346	0.0834284	0.184538	0.246974	0.326635	0.247579	0.313497	0.293227	0.191824	0.323493	0.122938	0.195527	0.232613	0.269006	0.310269
Blood glucose normalized (%)		36.0769	30.088	28.2807	34.0309	33.9589	15.2689	31.8059	24.9546	32.8729	45.6391	39.8947	28.4647	38.5961	39.3343	25.7357	39.1049	16.0376	21.7301	29.6241	35.7729	35.0726
PEP	M+0	0.394967	0.356071	0.388501	0.441566	0.310442	0.299883	0.273747	0.527856	0.283184	0.378342	0.325445	0.40744	0.406794	0.338885	0.23796	0.231817	0.21249	0.304561	0.287325	0.355172	0.2595
	M+1	0.0370128	0.0357848	0.0423102	0.0352732	0.051947	0.0575096	0.0558288	0.060603	0.0610577	0.0729614	0.0333238	0.0283846	0.0234671	0.0390557	0.0417233	0.0384387	0.0391361	0.0274846	0.042503	0.0343114	0.034334
	M+2	0.0428432	0.0449984	0.0496429	0.0395009	0.0598155	0.0636978	0.0624227	0.0544849	0.0647666	0.0736638	0.0418773	0.0342974	0.0330876	0.0497906	0.05713	0.057079	0.0568218	0.0460235	0.0539983	0.0415113	0.0492558
	M+3	0.525177	0.563146	0.519546	0.48366	0.577795	0.57891	0.608001	0.357056	0.590992	0.475033	0.599354	0.529878	0.536652	0.572269	0.663187	0.672666	0.691552	0.621931	0.616173	0.569005	0.65691
Fractional Abundance		0.566076	0.605073	0.566745	0.521751	0.634988	0.640545	0.668226	0.413581	0.654522	0.548463	0.63838	0.562204	0.566533	0.618481	0.715181	0.723531	0.742479	0.661775	0.66634	0.608117	0.701192
Blood glucose normalized (%)		72.3577	74.6635	73.9556	67.1353	87.7665	105.72	91.8688	123.708	116.595	101.352	77.971	64.6378	69.7485	82.9648	95.9509	87.4629	96.8586	73.5471	84.8608	80.8685	79.2621

## Sheet: table S5
Plasma Metabolites - Relative Abundance
	Relative metabolite abundance (arbitrary units/uL plasma, normalized to control diet-vehicle)
									Results of 2-Way ANOVA Testing
	8-weeks Control diet				8-weeks High-fat diet
	Vehicle		DEN		Vehicle		DEN		interaction			diet			DEN
	Average	STDev	Average	STDev	Average	STDev	Average	STDev	eta2	F (DFn, DFd)	P value	eta2	F (DFn, DFd)	P value	eta2	F (DFn, DFd)	P value
6-phosphogluconate	1	0.508423	1.57351	0.917031	3.47375	1.50542	5.3883	3.31234	1.876	F (1, 20) = 0.7360	0.4011	41.26	F (1, 20) = 16.18	0.0007	6.458	F (1, 20) = 2.534	0.1271
AKG	1	0.294139	1.53533	0.592943	2.59437	0.840774	0.925208	0.59347	39.6	F (1, 20) = 18.54	0.0003	7.895	F (1, 20) = 3.697	0.0689	10.49	F (1, 20) = 4.906	0.0385
Alanine	1	0.17033	1.16489	0.255962	1.02282	0.285656	0.584964	0.36134	19.63	F (1, 20) = 6.844	0.0165	16.77	F (1, 20) = 5.847	0.0253	4.026	F (1, 20) = 1.404	0.25
Aspartate	1	0.136998	0.993859	0.190032	1.13405	0.234578	1.53073	0.618364	6.614	F (1, 20) = 1.936	0.1794	18.35	F (1, 20) = 5.371	0.0312	6.217	F (1, 20) = 1.820	0.1924
Citrate	1	0.189448	2.62568	1.04873	1.86452	0.801017	3.1362	0.913532	0.65	F (1, 20) = 0.2624	0.6141	9.807	F (1, 20) = 3.960	0.0605	43.54	F (1, 20) = 17.58	0.0004
DHAP	1	0.466474	2.07882	0.383305	2.35852	0.931555	7.18228	6.73482	5.678	F (1, 20) = 1.781	0.197	16.91	F (1, 20) = 5.303	0.0322	14.11	F (1, 20) = 4.425	0.0483
Fumarate	1	0.128354	1.16477	0.204029	0.867764	0.417867	1.23235	0.46562	2.137	F (1, 20) = 0.5196	0.4793	0.2237	F (1, 20) = 0.05440	0.8179	15	F (1, 20) = 3.647	0.0706
Glycerol-3-phosphate	1	0.203766	1.76493	0.367403	1.98453	0.550368	2.16529	0.623343	5.862	F (1, 20) = 2.277	0.147	32.94	F (1, 20) = 12.80	0.0019	15.36	F (1, 20) = 5.967	0.024
Glycine	1	0.0747699	1.04559	0.3117	1.10955	0.266973	1.20057	0.702805	0.08573	F (1, 20) = 0.01779	0.8952	2.906	F (1, 20) = 0.6032	0.4465	0.7751	F (1, 20) = 0.1609	0.6926
Hexose-phosphates	1	0.456885	2.21876	1.04447	1.5754	0.487232	3.85691	2.40216	2.536	F (1, 19) = 0.8134	0.3784	11	F (1, 19) = 3.529	0.0757	27.51	F (1, 19) = 8.824	0.0079
Lactate	1	0.176124	0.867341	0.531532	1.34822	0.222983	1.0309	0.236734	1.612	F (1, 20) = 0.4295	0.5197	12.38	F (1, 20) = 3.299	0.0843	9.57	F (1, 20) = 2.551	0.1259
Leucine	1	0.156543	1.19226	0.193481	1.11138	0.287807	0.956358	0.350669	11.37	F (1, 20) = 2.639	0.1199	1.462	F (1, 20) = 0.3393	0.5667	0.1308	F (1, 20) = 0.03034	0.8635
Malate	1	0.182745	1.21511	0.589279	2.09106	0.515948	1.53296	0.235037	11.45	F (1, 20) = 4.624	0.0439	38.02	F (1, 20) = 15.35	0.0009	2.253	F (1, 20) = 0.9099	0.315
PEP	1	0.257428	2.06243	1.277	4.1812	2.87951	7.4961	0.691665	3.802	F (1, 17) = 2.129	0.1628	55.62	F (1, 17) = 31.14	<0.0001	14.36	F (1, 17) = 8.040	0.0114
Phenylalanine	1	0.11305	1.10251	0.269783	1.08723	0.295808	1.01347	0.455555	2.285	F (1, 20) = 0.4681	0.5017	0.0002406	F (1, 20) = 4.929e-005	0.9945	0.06079	F (1, 20) = 0.01245	0.9123
Proline	1	0.0680672	1.79256	0.577093	1.42031	0.181765	1.19245	0.245806	33.35	F (1, 20) = 12.40	0.0021	1.035	F (1, 20) = 0.3849	0.542	10.21	F (1, 20) = 3.797	0.0655
Pyruvate	1	0.36145	0.675331	0.353256	0.813413	0.353084	0.407998	0.167696	0.3135	F (1, 20) = 0.09475	0.7614	9.907	F (1, 20) = 2.994	0.099	25.63	F (1, 20) = 7.746	0.0115
Ribulose-5-p	1	0.50422	2.01277	0.560778	2.85041	1.55759	6.94017	4.00764	6.542	F (1, 20) = 2.937	0.102	31.74	F (1, 20) = 14.25	0.0012	17.99	F (1, 20) = 8.077	0.0101
Sedoheptulose-5-p	1	0.376693	2.96125	1.34436	3.16911	2.55413	7.4787	4.35046	3.063	F (1, 20) = 1.176	0.291	24.83	F (1, 20) = 9.537	0.0058	21.84	F (1, 20) = 8.388	0.0089
Serine	1	0.127184	1.06261	0.169615	1.00469	0.323321	0.305104	0.411093	21.7	F (1, 20) = 10.71	0.0038	21.17	F (1, 20) = 10.44	0.0042	15.16	F (1, 20) = 7.477	0.00128
Succinate	1	0.298612	0.943001	1.17824	2.51036	1.41825	1.62696	0.767907	3.224	F (1, 20) = 0.9312	0.3461	22.73	F (1, 20) = 6.565	0.0186	4.175	F (1, 20) = 1.206	0.2852
Threonine	1	0.157856	1.1609	0.240932	0.863946	0.165988	1.60804	0.763761	9.384	F (1, 20) = 2.872	0.1056	2.67	F (1, 20) = 0.8173	0.3767	22.6	F (1, 20) = 6.917	0.0161
Valine	1	0.0265344	1.25005	0.126169	1.09862	0.0987768	1.00223	0.372146	16.07	F (1, 20) = 4.228	0.053	2.981	F (1, 20) = 0.7842	0.3864	3.162	F (1, 20) = 0.8319	0.3726
Xylulose-5-p and ribose-5-p (overlapping peak)	1	0.487439	1.79995	0.608094	2.72794	1.38023	5.43374	2.10108	5.393	F (1, 20) = 3.090	0.0941	42.68	F (1, 20) = 24.46	<0.0001	18.25	F (1, 20) = 10.46	0.0042

## Sheet: tabls S6
Glycolysis and Gluconeogenesis Genes (KEGG) - DESeq Moderated Counts and Z-score
Ensembl	geneName	baseMean	log2FoldChange	lfcSE	stat	pvalue	padj	CD-Veh-1	CD-Veh-2	CD-Veh-3	CD-Veh-4	CD-DEN-1	CD-DEN-2	CD-DEN-3	CD-DEN-4	HFD-Veh-1	HFD-Veh-2	HFD-Veh-3	HFD-Veh-4	HFD-DEN-1	HFD-DEN-2	HFD-DEN-3	HFD-DEN-4	Zscore	CD-Veh-1	CD-Veh-2	CD-Veh-3	CD-Veh-4	CD-DEN-1	CD-DEN-2	CD-DEN-3	CD-DEN-4	HFD-Veh-1	HFD-Veh-2	HFD-Veh-3	HFD-Veh-4	HFD-DEN-1	HFD-DEN-2	HFD-DEN-3	HFD-DEN-4
ENSMUSG00000027513	Pck1	44815.9	1.61849	0.24243	6.67612	2.45e-11	1.18e-08	57331.2	54163.4	47628.6	64813.1	71601.8	90027.7	65436.8	89894.4	11384.4	20315.5	19812.7	17856.8	26750.4	27648	10451.7	41937.7		0.467483	0.349155	0.105063	0.746952	1.00053	1.68879	0.77025	1.68381	-1.24876	-0.915159	-0.93394	-1.007	-0.674797	-0.641272	-1.2836	-0.107508
ENSMUSG00000028692	Akr1a1	5271.09	-0.351761	0.0724409	-4.85584	1.2e-06	0.000118337	4258.67	4856.95	4242.07	4246.27	5064.19	4851.5	4263.83	5260.94	5926.66	5422.36	5257.85	6760.51	5524.6	6179.71	5923.63	6297.65		-1.26685	-0.518217	-1.28762	-1.28236	-0.258897	-0.525032	-1.26039	-0.0126918	0.82033	0.189292	-0.0165661	1.86373	0.317222	1.13697	0.816534	1.28455
ENSMUSG00000069805	Fbp1	22855.2	0.438748	0.106019	4.13839	3.5e-05	0.0019849	22894.2	30781.6	19720.9	22932.9	27592.9	29635.9	32874.7	23997.5	17243	19087.5	19776.8	21056.6	18140.3	22191.1	19954	17802.8		0.00799378	1.62295	-0.641751	0.0159067	0.970053	1.38837	2.05152	0.2339	-1.1491	-0.771435	-0.630301	-0.368267	-0.965374	-0.135974	-0.594016	-1.03447
ENSMUSG00000010025	Aldh3a2	5760.44	-1.16531	0.299803	-3.8869	0.000101531	0.00444262	2378.24	2223.23	2628.85	2683.79	5714.42	3678.82	1356.93	7756.31	6072.05	8429.38	5688.94	13829	8751.36	5185	6878.51	8912.31		-1.02375	-1.07067	-0.947893	-0.931262	-0.013931	-0.63008	-1.33288	0.604122	0.0943177	0.807852	-0.0216432	2.44223	0.90531	-0.174179	0.338422	0.954028
ENSMUSG00000040618	Pck2	58.093	0.846032	0.220336	3.83974	0.000123166	0.00510467	60.5922	59.9198	37.7274	53.9975	129.905	95.9222	79.2266	78.7665	55.1045	47.047	32.2398	42.698	46.1741	42.0755	34.8494	33.2421		0.094479	0.0690606	-0.769893	-0.154825	2.71477	1.43008	0.798927	0.781534	-0.112976	-0.417581	-0.977347	-0.581989	-0.450577	-0.605519	-0.878692	-0.939457
ENSMUSG00000041798	Gck	3284.96	-0.762347	0.224063	-3.40238	0.000668027	0.0171622	3328.44	2369.93	3947.8	2001.35	2104.61	2299.43	991.052	2450.51	4837.47	4863.38	5093.89	4218.04	3399.23	4640.18	3799.36	2214.61		0.0347012	-0.730214	0.528967	-1.02435	-0.941952	-0.786476	-1.8306	-0.665909	1.23895	1.25963	1.44358	0.744629	0.0911952	1.08151	0.410512	-0.854166
ENSMUSG00000030246	Ldhb	30.2794	0.664098	0.20091	3.30545	0.000948252	0.0221277	30.9846	44.0789	36.2183	35.6154	49.4205	27.0203	37.4526	35.0073	21.1038	24.7196	22.1073	29.7592	18.3338	30.2081	30.9773	11.4628		0.0734	1.43616	0.618086	0.555334	1.99207	-0.339177	0.746535	0.492053	-0.954925	-0.578623	-0.850494	-0.0541366	-1.24321	-0.00741875	0.0726339	-1.9583
ENSMUSG00000024885	Aldh3b1	68.1844	0.669569	0.210234	3.18488	0.00144815	0.0293376	74.3631	73.6945	76.964	48.2531	127.787	121.592	84.9885	62.3568	64.484	52.6288	74.6121	34.9347	51.6064	37.7601	46.4659	58.4602		0.234279	0.208925	0.332894	-0.755739	2.25997	2.02504	0.637161	-0.220967	-0.140311	-0.589824	0.243718	-1.26073	-0.628591	-1.1536	-0.823503	-0.368716
ENSMUSG00000011752	Pgam1	463.417	-0.284692	0.107779	-2.64143	0.00825557	0.0906721	374.57	453.875	491.966	427.385	396.776	359.371	370.204	467.129	514.699	439.371	633.742	502.025	386.369	494.118	517.321	585.748		-1.13124	-0.121485	0.3635	-0.45878	-0.848504	-1.32477	-1.18683	0.047267	0.652956	-0.306164	2.16867	0.491575	-0.981011	0.390904	0.686331	1.55758
ENSMUSG00000021748	Pdhb	1351.03	-0.471525	0.185799	-2.53782	0.0111547	0.108019	1072.76	979.379	1270.66	1108.67	1149.38	1329.4	857.087	1289.8	1261.54	1511.08	1062.07	2262.99	1432.08	2609.76	1420.31	999.554		-0.598964	-0.799953	-0.172996	-0.521661	-0.434042	-0.0465615	-1.06318	-0.131796	-0.192624	0.344497	-0.621966	1.96291	0.174441	2.70931	0.149109	-0.756527
ENSMUSG00000041237	Pklr	3758.32	-0.716113	0.293214	-2.44229	0.0145945	0.12773	2679.14	2759.76	3926.67	3621.28	3587.22	2358.88	2108.87	1710.98	3455.17	3904.9	4263.02	12112	3092.99	4179.5	4604	1768.71		-0.449256	-0.415696	0.0700849	-0.0570479	-0.0712262	-0.582579	-0.686657	-0.852293	-0.126199	0.061021	0.210106	3.47759	-0.276973	0.175338	0.352053	-0.828263
ENSMUSG00000035561	Aldh1b1	987.041	0.475821	0.195353	2.4357	0.014863	0.129667	1452.15	1040.68	757.567	896.129	1376.01	1745.51	806.67	1109.29	769.118	937.75	826.26	958.764	704.156	551.298	616.448	1244.86		1.42211	0.163996	-0.701642	-0.277974	1.18931	2.31911	-0.551502	0.373804	-0.666323	-0.150713	-0.491606	-0.0864614	-0.864953	-1.33233	-1.13313	0.788303
ENSMUSG00000078650	G6pc	4532.29	0.902436	0.380775	2.37	0.0177881	0.144243	2270.14	3735.69	4352.24	2471.25	7476.61	11559.3	2852.16	12525	2192.46	2746.27	1628.57	3646.15	2572.85	7828.21	2324.85	2334.97		-0.658405	-0.231853	-0.0524056	-0.599873	0.856953	2.04523	-0.489008	2.32629	-0.681016	-0.519828	-0.845137	-0.257915	-0.570301	0.959287	-0.642484	-0.639537
ENSMUSG00000028138	Adh5	7111.18	-0.194589	0.0829575	-2.34565	0.0189939	0.150782	5830.62	7137.35	5705.9	6383.19	8049.18	6298.44	6472.09	7176.5	7582.14	8120.78	6566.78	7727.04	7567.81	8520.84	7933.28	6706.87		-1.49197	0.0304891	-1.63729	-0.84817	1.09287	-0.946915	-0.744598	0.0761107	0.548722	1.17629	-0.63427	0.717539	0.532017	1.64239	0.957833	-0.471053
ENSMUSG00000000628	Hk2	119.071	-0.926141	0.401477	-2.30684	0.0210639	0.160343	77.8059	57.8536	117.71	67.7841	131.317	71.6039	73.4646	59.0749	72.691	51.8314	229.363	131.976	114.756	512.459	71.2477	64.1916		-0.361693	-0.536579	-0.0119293	-0.449536	0.107345	-0.416055	-0.399745	-0.525874	-0.406526	-0.589365	0.966736	0.113115	-0.0378154	3.44812	-0.419177	-0.481025
ENSMUSG00000033065	Pfkm	221.943	0.26576	0.12488	2.12811	0.0333276	0.21114	228.598	212.819	264.092	244.712	204.742	293.171	177.179	312.878	214.556	220.882	204.492	229.016	167.042	194.195	162.631	220.085		0.16052	-0.220093	1.01669	0.549217	-0.414912	1.7181	-1.07976	2.19346	-0.178191	-0.0256063	-0.420934	0.170617	-1.32429	-0.669323	-1.43069	-0.0448103
ENSMUSG00000031299	Pdha1	2140.15	-0.159922	0.077671	-2.05896	0.0394979	0.231526	1843.24	2038.65	2138.39	1933.57	2217.57	1707.69	1992.19	2300.64	1983.76	2208.02	2061.5	2612.34	2296.48	2239.71	2499.87	2168.76		-1.28198	-0.438244	-0.00759019	-0.89196	0.334278	-1.86728	-0.638862	0.692957	-0.675245	0.293044	-0.33957	2.03882	0.675022	0.4299	1.55318	0.123529
ENSMUSG00000020277	Pfkl	1365.1	-0.520283	0.260381	-1.99816	0.0456994	0.251292	756.714	1798.97	1871.28	1017.91	994.764	825.471	895.98	811.732	1519.48	1165.81	2677.74	961.351	808.047	2364.86	1758.74	1612.81		-1.01724	0.725433	0.846335	-0.580512	-0.619214	-0.902273	-0.784381	-0.925245	0.258114	-0.333226	2.19475	-0.67508	-0.931406	1.67161	0.658157	0.414173
ENSMUSG00000037797	Adh4	1225.23	-0.453047	0.246737	-1.83615	0.0663354	0.305359	1151.94	979.379	642.875	1323.51	1303.29	787.643	1063.08	1021.78	1215.82	1595.61	965.351	1077.8	1527.14	718.521	1105.11	3124.75		-0.128525	-0.431157	-1.02131	0.172375	0.136905	-0.767417	-0.284371	-0.356802	-0.0165011	0.649569	-0.455758	-0.258549	0.529491	-0.888641	-0.210646	3.33133
ENSMUSG00000063229	Ldha	24736.9	-0.336342	0.190481	-1.76575	0.0774376	0.331399	21813.2	29137.6	26173.8	17961.6	22799.1	11548.5	29756.1	15740.2	27454.9	19014.9	34689.1	22972.8	23717.9	38317.9	27613.1	27079.7		-0.42761	0.643624	0.210154	-0.990923	-0.283417	-1.92888	0.734083	-1.31583	0.39753	-0.83687	1.45557	-0.25801	-0.149036	1.9863	0.42067	0.342645
ENSMUSG00000017390	Aldoc	237.004	-0.329244	0.207711	-1.58511	0.112942	0.400611	132.89	303.731	208.255	206.799	342.413	125.645	227.596	131.277	181.728	286.269	244.101	239.367	260.069	279.425	293.51	328.982		-1.50977	0.967629	-0.416881	-0.438001	1.52856	-1.61483	-0.136416	-1.53315	-0.801564	0.714401	0.102924	0.0342778	0.334475	0.615155	0.819402	1.33379
ENSMUSG00000020080	Hkdc1	3.72422	-0.746942	0.492047	-1.51803	0.129007	0.42744	2.75419	2.0662	1.5091	2.29777	3.53003	2.70203	2.88097	4.37592	1.17244	3.18962	8.29023	6.46939	2.71613	2.15772	7.74432	5.73139		-0.443704	-0.758402	-1.01323	-0.65248	-0.0888213	-0.467561	-0.385715	0.298098	-1.16722	-0.24453	2.08857	1.25569	-0.461116	-0.716539	1.83886	0.918113
ENSMUSG00000026687	Aldh9a1	5048.73	-0.144167	0.0969642	-1.48681	0.137065	0.440916	4602.25	5113.16	4402.04	4455.37	4962.52	3830.13	4505.83	6498.24	5081.34	5945.46	4560.55	5611.55	5247.55	5053.38	5369.14	5541.11		-0.672731	0.0970835	-0.97441	-0.894051	-0.129888	-1.83613	-0.818016	2.18407	0.0491382	1.35117	-0.73557	0.848042	0.299589	0.00701455	0.482786	0.741905
ENSMUSG00000025791	Pgm1	4788.43	-0.0962754	0.0784838	-1.22669	0.219939	0.555291	3957.08	4956.82	4758.18	4673.66	5160.91	4358.38	3908.03	5251.1	5074.3	5087.45	4614.9	4813.23	4287.4	5262.68	4948.62	5502.13		-1.78348	0.361235	-0.0648865	-0.246222	0.799078	-0.922577	-1.88871	0.992559	0.61328	0.641488	-0.372281	0.0531947	-1.07484	1.0174	0.343656	1.5311
ENSMUSG00000000168	Dlat	724.124	-0.194544	0.161219	-1.2067	0.227546	0.562962	687.859	539.967	608.166	680.139	846.502	591.745	471.038	973.641	735.117	806.975	600.581	1189.07	725.885	678.603	683.824	766.86		-0.208592	-1.05926	-0.666984	-0.252999	0.70392	-0.761436	-1.45574	1.43522	0.0632362	0.476561	-0.710613	2.67438	0.0101295	-0.261833	-0.231805	0.245819
ENSMUSG00000021456	Fbp2	3.3867	-0.698695	0.582359	-1.19977	0.23023	0.56595	1.3771	1.37747	3.01819	2.29777	2.82403	2.70203	2.88097	4.37592	1.17244	3.18962	1.84227	3.88163	3.39516	1.07886	3.87216	14.9016		-0.62088	-0.620765	-0.113853	-0.336433	-0.173842	-0.211532	-0.15625	0.305624	-0.684111	-0.0608881	-0.477161	0.152912	0.00261235	-0.713022	0.149985	3.5576
ENSMUSG00000032294	Pkm	416.329	-0.359371	0.322313	-1.11498	0.264861	0.603701	306.404	338.857	605.148	243.563	614.226	297.224	338.513	173.943	438.491	235.235	873.238	270.42	317.787	938.608	417.419	252.181		-0.483756	-0.340937	0.830955	-0.760304	0.870905	-0.524155	-0.342448	-1.06669	0.0975325	-0.796956	2.01076	-0.642111	-0.433662	2.29844	0.00479831	-0.722378
ENSMUSG00000025877	Hk3	87.8939	0.362068	0.325709	1.11163	0.266297	0.605154	130.136	57.8536	72.4367	55.1464	206.86	126.996	83.548	56.8869	83.243	71.7666	146.461	77.6327	94.3854	59.3373	24.0074	59.6065		0.941159	-0.669308	-0.344392	-0.729626	2.65061	0.871201	-0.0968277	-0.690847	-0.103624	-0.359323	1.30489	-0.228624	0.144633	-0.636251	-1.42341	-0.630254
ENSMUSG00000020664	Dld	2722.19	-0.0985094	0.0923447	-1.06676	0.286081	0.623567	2505.62	2782.48	3135.9	2980.2	2317.82	1995.45	2687.94	2631.02	2741.16	2896.98	2852.76	3171.29	2691.68	2903.21	2928.9	2332.68		-0.692461	0.192769	1.3228	0.824959	-1.29295	-2.32369	-0.109521	-0.291523	0.0606264	0.558852	0.417474	1.43596	-0.0975647	0.578791	0.66093	-1.24545
ENSMUSG00000038871	Bpgm	346.085	-0.158604	0.150748	-1.05212	0.292746	0.629139	290.567	291.334	313.892	358.452	475.849	330.999	272.251	281.153	399.801	468.875	296.606	335.114	361.924	278.346	292.735	489.461		-0.747351	-0.737023	-0.43336	0.166473	1.74681	-0.203076	-0.993908	-0.874084	0.723093	1.65293	-0.666058	-0.147679	0.213214	-0.911865	-0.718163	1.93005
ENSMUSG00000063524	Eno1	4302.24	-0.151244	0.146263	-1.03406	0.30111	0.63546	3701.63	4082.81	3615.8	3165.17	5826.67	4042.24	3160.42	5016.99	3898.35	4432.78	4367.11	5255.73	3971.65	5894.89	5072.53	3331.08		-0.681369	-0.248935	-0.778746	-1.28996	1.72941	-0.294959	-1.29535	0.810852	-0.458201	0.148092	0.0735897	1.0817	-0.375039	1.8068	0.873863	-1.10174
ENSMUSG00000030695	Aldoa	2166.15	-0.231186	0.271508	-0.851486	0.394499	0.712955	1493.46	2223.23	3259.65	1472.87	2091.9	2064.35	1441.92	1896.96	1829	1567.7	3585.99	1586.29	1384.55	4961.68	2516.13	1282.69		-0.67499	0.0572794	1.09724	-0.695652	-0.0745034	-0.102142	-0.726703	-0.270109	-0.338301	-0.600495	1.4247	-0.581838	-0.784278	2.8051	0.35118	-0.886486
ENSMUSG00000029171	Pgm2	126.622	0.191604	0.23417	0.818224	0.413229	0.726463	114.987	116.396	224.855	121.782	132.023	72.9549	230.477	68.9207	98.4846	109.245	158.436	113.861	93.7063	148.883	122.36	98.5799		-0.253525	-0.222832	2.14058	-0.105475	0.117698	-1.16944	2.26308	-1.25735	-0.613133	-0.378664	0.693239	-0.278065	-0.717255	0.485076	-0.092866	-0.611056
ENSMUSG00000053644	Aldh7a1	7891.64	-0.0715013	0.089999	-0.794468	0.426923	0.73541	7940.33	7942.47	7420.23	7950.27	6702.83	7738.63	6761.63	9111.75	8515.4	9494.72	7833.35	8733.68	7872.01	8584.49	7482.56	6181.88		0.0551914	0.0576209	-0.534328	0.0664577	-1.34748	-0.173436	-1.28084	1.38296	0.707019	1.81704	-0.0660723	0.954426	-0.0222476	0.785329	-0.463677	-1.93797
ENSMUSG00000023456	Tpi1	5177.96	-0.0890627	0.117056	-0.760857	0.446743	0.751136	4187.75	5053.93	5832.66	4734.55	5485.67	5291.93	3948.36	5609.92	4932.44	4967.04	5594.06	4625.61	3947.89	5933.73	5849.29	6852.45		-1.25425	-0.157102	0.829286	-0.561646	0.389773	0.144371	-1.55747	0.547156	-0.310986	-0.267153	0.527066	-0.699628	-1.55807	0.957307	0.850344	2.12101
ENSMUSG00000027452	Acss1	8.08627	0.326442	0.434241	0.751754	0.452199	0.755583	5.50838	3.44367	13.5819	9.19106	17.6502	17.5632	4.32145	1.09398	7.03462	3.98703	7.36909	9.05715	8.14838	7.55202	9.29318	4.58511		-0.543597	-0.978981	1.15885	0.232966	2.01673	1.99839	-0.793884	-1.47446	-0.221762	-0.864402	-0.151231	0.204726	0.0130955	-0.112657	0.2545	-0.738286
ENSMUSG00000035473	Galm	1946.96	-0.0768301	0.105064	-0.731267	0.464616	0.765107	2042.23	1782.44	1964.84	2074.88	1945.05	1781.99	1384.3	2182.49	2122.11	2493.49	1787.93	2294.05	1920.3	1714.31	1881.87	1779.02		0.366352	-0.632589	0.0687822	0.4919	-0.00733579	-0.634323	-2.16351	0.905663	0.673494	2.10152	-0.611502	1.33462	-0.102497	-0.894575	-0.250271	-0.645735
ENSMUSG00000055301	Adh7	401.571	0.116257	0.194843	0.596669	0.550728	0.817134	478.541	520.683	537.239	499.764	258.399	303.979	345.716	398.208	536.976	476.849	493.729	314.412	370.072	219.009	363.209	308.349		0.731913	1.13264	1.29008	0.93373	-1.36144	-0.92801	-0.531129	-0.0319733	1.28758	0.715827	0.876344	-0.828797	-0.299523	-1.736	-0.364789	-0.886456
ENSMUSG00000004267	Eno2	3.76299	-0.297501	0.52467	-0.567025	0.570697	0.828258	4.81983	2.75493	4.52729	3.44665	1.41201	5.40407	4.32145	1.09398	4.68974	3.18962	10.1325	1.29388	6.11128	4.31544	1.54886	1.14628		0.446872	-0.426242	0.323175	-0.13376	-0.994078	0.693907	0.236137	-1.12855	0.391865	-0.242439	2.69326	-1.04403	0.992943	0.233596	-0.936212	-1.10644
ENSMUSG00000037012	Hk1	95.2029	0.128848	0.231584	0.556377	0.577953	0.832019	95.7081	79.2044	135.819	89.6129	152.497	72.9549	110.917	59.0749	104.347	78.1458	154.751	73.751	80.1257	111.123	78.2176	46.9974		0.0161161	-0.51035	1.29563	-0.17832	1.82768	-0.709705	0.501281	-1.15248	0.291688	-0.544117	1.89957	-0.684309	-0.480959	0.507834	-0.541826	-1.53774
ENSMUSG00000020475	Pgam2	6.22778	-0.231801	0.442781	-0.523512	0.600618	0.842766	8.26257	6.1986	7.54549	4.59553	4.94205	8.1061	0	5.46989	9.37949	3.98703	6.44796	1.29388	6.11128	16.1829	3.09773	8.02395		0.550991	-0.00790062	0.356815	-0.441988	-0.348156	0.508622	-1.68639	-0.205223	0.853435	-0.60676	0.0596212	-1.33603	-0.0315452	2.6957	-0.84757	0.486375
ENSMUSG00000029455	Aldh2	39160.6	-0.0337071	0.0809648	-0.416318	0.677177	0.879073	36307.1	44235.3	39551.9	37916.6	37614.6	31230.1	37936.6	44831.3	39049.2	43424.4	37870.7	41391.2	40139.6	42028.1	40363.4	32679.2		-0.759013	1.34986	0.1041	-0.330897	-0.411216	-2.10949	-0.325585	1.50839	-0.0296372	1.13416	-0.343104	0.59333	0.260415	0.762751	0.31995	-1.72402
ENSMUSG00000024896	Minpp1	575.519	-0.0445417	0.124113	-0.358879	0.719686	0.899702	567.363	517.239	502.529	520.444	590.928	728.198	491.205	613.722	528.769	590.081	446.751	666.347	590.078	470.383	573.854	810.419		-0.0851524	-0.608465	-0.762037	-0.575002	0.160868	1.59401	-0.88027	0.398849	-0.488091	0.152023	-1.34438	0.948267	0.151999	-1.09765	-0.0173854	2.45241
ENSMUSG00000061099	Gapdhs	15.7817	-0.0923886	0.260409	-0.354783	0.722752	0.900703	20.6564	15.8409	12.0728	16.0844	15.5322	9.45712	20.1668	12.0338	17.5865	23.1248	14.7382	10.351	20.3709	23.7349	9.29318	11.4628		1.01826	0.0123675	-0.774726	0.0632292	-0.0521189	-1.32109	0.915976	-0.782874	0.37701	1.53386	-0.217965	-1.13437	0.958626	1.66131	-1.35534	-0.902145
ENSMUSG00000021196	Pfkp	75.9846	-0.0962193	0.315996	-0.304495	0.760751	0.91524	70.2319	52.3437	125.255	75.8263	98.135	67.5509	47.5359	51.417	52.7596	38.2755	151.988	59.5184	97.7805	142.41	50.3381	34.3883		-0.156459	-0.642969	1.34003	-0.00430526	0.602433	-0.229375	-0.773729	-0.668174	-0.631658	-1.02559	2.06708	-0.447838	0.592793	1.80659	-0.697518	-1.13131
ENSMUSG00000074207	Adh1	24524.2	-0.0428612	0.140973	-0.304039	0.761098	0.915431	20562.1	26378.5	18688.7	28186.7	31134.9	23469.9	17947	26908.6	24635.2	30531.9	18079.2	27998.2	25590	18572.6	26310.6	27393.8		-0.888842	0.415975	-1.30912	0.821617	1.483	-0.236529	-1.4755	0.534897	0.0249003	1.34772	-1.44585	0.779336	0.239084	-1.33516	0.400734	0.643733
ENSMUSG00000036427	Gpi1	3865.26	-0.0516921	0.228125	-0.226596	0.820738	0.939413	2509.76	3624.12	6547.97	3428.27	4655.41	3243.79	2801.74	3557.62	3017.85	2812.45	3884.43	4150.76	2380.68	7106.45	4960.24	3162.58		-0.995149	-0.177036	1.96953	-0.320819	0.580094	-0.456252	-0.780788	-0.225854	-0.622129	-0.772923	0.0140782	0.209603	-1.08991	2.37954	0.803885	-0.515874
ENSMUSG00000062070	Pgk1	1734.34	-0.0258165	0.11609	-0.222383	0.824016	0.93992	1418.41	1907.1	2156.5	1753.2	1827.15	1251.04	1663.76	1773.34	1687.14	1601.99	1930.7	1676.87	1510.84	2262.37	1806.75	1522.26		-1.22511	0.669947	1.63706	0.073126	0.35989	-1.87412	-0.273695	0.151242	-0.183042	-0.513221	0.761461	-0.222865	-0.866659	2.0476	0.280799	-0.822405
ENSMUSG00000034793	G6pc3	98.9466	-0.0174249	0.131075	-0.132938	0.894242	0.96612	81.9372	95.0452	70.9276	96.5062	129.199	112.134	102.274	98.4581	99.6571	117.219	74.6121	95.747	107.287	91.7031	108.42	102.019		-1.13751	-0.260907	-1.87377	-0.163206	2.02314	0.88193	0.222535	-0.0326708	0.0475086	1.22194	-1.62737	-0.213978	0.557757	-0.48441	0.633562	0.205446
ENSMUSG00000028307	Aldob	103536	0.026852	0.21654	0.124005	0.901311	0.968799	81970.9	86343.8	147697	85591.8	120439	109231	90149.7	114570	84744.8	85489.1	71448.9	171520	80272.4	140457	133989	52655.4		-0.672963	-0.536501	1.37812	-0.559968	0.527501	0.177735	-0.417729	0.344352	-0.586398	-0.563172	-1.00132	2.12157	-0.725969	1.15219	0.950351	-1.5878
ENSMUSG00000057666	Gapdh	3223.78	0.0647013	0.552987	0.117003	0.906857	0.970748	625.89	698.376	5846.24	4558.77	1018.77	4482.67	4245.1	4893.37	3928.83	4203.93	4888.47	5083.65	604.338	1462.93	842.582	4196.52		-1.34059	-1.30318	1.35327	0.688895	-1.13785	0.649629	0.527035	0.861559	0.36383	0.505786	0.859033	0.959748	-1.35171	-0.908648	-1.22877	0.501966
ENSMUSG00000025236	Adpgk	510.088	0.0118113	0.11014	0.10724	0.914599	0.97385	438.605	461.451	375.765	464.149	699.653	607.958	524.336	524.016	471.319	499.176	516.758	513.67	541.188	524.326	509.576	489.461		-0.998917	-0.679654	-1.87705	-0.641962	2.64901	1.36765	0.199102	0.194633	-0.54176	-0.152481	0.0932054	0.0500502	0.434599	0.198966	-0.00714925	-0.288248
ENSMUSG00000027605	Acss2	1349.06	-0.0182283	0.180308	-0.101095	0.919475	0.974639	1652.51	1165.34	1287.26	1051.23	2160.38	1275.36	832.599	1295.27	1118.5	1550.96	1070.36	1561.71	1264.36	1079.94	1269.29	1949.82		0.872299	-0.528103	-0.177633	-0.856113	2.33217	-0.211839	-1.48457	-0.154605	-0.662726	0.580365	-0.801114	0.611282	-0.24347	-0.773582	-0.229276	1.72691
ENSMUSG00000060600	Eno3	63.6886	-0.0176744	0.203377	-0.086905	0.930747	0.977829	45.4441	63.3635	40.7456	45.9553	104.489	81.061	38.893	84.2364	62.1391	68.5769	49.7414	69.8694	71.2983	70.1259	61.1801	61.899		-1.0481	-0.0186794	-1.31801	-1.01873	2.34387	0.997997	-1.42444	1.18041	-0.0890165	0.280819	-0.801232	0.355068	0.437154	0.369804	-0.144107	-0.102809

## Sheet: table S7
Profile summary of subjects that underwent OGTT
		n	20
		age	29±9
		Gender	6 female/14 male
		Height (cm)	168±8	(153-178)
		Weight (kg)	59±9	(41-76)
		Waist (cm)	74±8	(60-87)
		BMI (kg/m2)	20.8±2.2	(17.5-25.7)
		Fasting glucose (mg/100ml)	96±8	(82-115)
		120 min glucose (mg/100ml)	131±35	(75-238)
		Fasting insulin (mg/100ml)	5.7±2.1	(1.8-10.8)
		120 min insulin (mg/100ml)	45.71±23.1	(10.6-95.6)
		Data are expressed as mean ± s.d. (range).
							Cuttoff rates
	Patient #	Matsuda Index	HOMA-IR	Insulinogenic Index	Disposition Index		Matsuda index	≤2.5
	1	5.9611	1.25827	0.269231	1.60491		HOMA-IR	≥2.5
	2	7.62014	0.896296	0.423457	3.2268		insulinogenic index	≤0.4
	3	12.1967	0.358642	0.270833	3.30328		Dispostion index	≥1
	4	3.57877	1.78469	0.539035	1.92908
	5	16.2032	0.487407	0.262963	4.26084
	6	3.4791	1.71926	1.50826	5.24738
	7	3.58209	2.45963	0.50068	1.79348
	8	9.32357	0.948889	0.628966	5.8642
	9	5.20531	1.90778	0.369753	1.92468
	10	5.96892	1.42685	0.381752	2.27865
	11	4.08634	1.54759	0.543373	2.22041
	12	5.43907	1.73475	0.592035	3.22012
	13	6.63821	1.1963	0.930556	6.17722
	14	5.82891	1.04481	0.409239	2.38542
	15	2.64664	2.77333	1.24615	3.29812
	16	6.69158	0.921235	0.404545	2.70705
	17	6.53808	1.14722	0.719355	4.7032
	18	6.7121	1.53642	1.96458	13.1865
	19	7.70647	0.92	0.335377	2.58458
	20	4.08386	1.42765	0.241176	0.984931

## Sheet: table S8
Extended HepatoNet1 based differential flux-balance analysis (DFA)
commonalities in the top 75 altered metabolites
	objectives
	palmitate metabolism	biomass production	metabolic pathway
Metabolite	ranking (out of 1445)	ranking (out of 1445)	based on altered metabolites
'Serine(c)'	11	7	serine metabolism
'Glyoxylate(p)'	15	39
'Glycine(c)'	23	12
'10-Formyl-THF(c)'	37	19
'5,10-Methenyl-THF(c)'	38	27
'Isocitrate(m)'	32	53	mitochondrial metabolism
'Acetyl-CoA(m)'	63	51
'Pyruvate(m)'	73	10
'Malate(m)'	74	61
'Pyruvate(c)'	29	60	glycolysis
'GAP(c)'	54	28
'PEP(c)'	60	59
'Histidine(c)'	18	40	histidine mtabolism
'beta-Alanine(c)'	19	73
'Threonine(c)'	51	75	threonine metabolism
'H2O2(c)'	7	11	reactive oxygen species (ROS)
'H2O(s)'	10	8	condenstation, (de)carboxylation,
'Pi(s)'	12	6	phosphorylation reactions and
'Pi(c)'	21	2	proton transfer
'CO2(c)'	26	17
'H2O(c)'	41	1
'H+(PG)(c)'	43	26
c = cytosol; m = mitochondria, s = serum, p = peroxisomes

## Sheet: table S9
		13C Metabolite Enrichment in Paired Tumor and Adjacent Liver Tissue (##weeks HFD)
		Mice were injected with PBS or DEN at 2weeks of age, and maintained on CD or HFD for 29 weeks
		* Mice 20 and 21 have 2 different tumor sections analyzed, different values are designated by the letters a and b (20a, 20b, 21a, 21b).
		% Serine with 13C enrichment normalized to serum 13C-glucose enrichment												% Pyruvate 13C enrichment normalized to serum 13C-glucose enrichment												% Succinate 13C enrichment normalized to serum 13C-glucose enrichment
		CD+Vehicle		CD+DEN			HFD-Vehicle			HFD+DEN				CD+Vehicle		CD+DEN			HFD-Vehicle			HFD+DEN				CD+Vehicle		CD+DEN			HFD-Vehicle			HFD+DEN
		Mouse	Liver	Mouse	Liver	Tumor	Mouse	Liver	Tumor	Mouse	Liver	Tumor		Mouse	Liver	Mouse	Liver	Tumor	Mouse	Liver	Tumor	Mouse	Liver	Tumor		Mouse	Liver	Mouse	Liver	Tumor	Mouse	Liver	Tumor	Mouse	Liver	Tumor
		1	2.66474	4	1.24637	5.56723	10	2.40888	8.18147	15	6.18278	9.22893		1	36.6135	4	30.3878	31.9426	10	50.6342	53.7719	15	60.8024	60.8386		1	28.9909	4	23.8035	29.0409	10	21.6024	28.8231	15	44.9119	43.6452
		2	0	5	1.59535	3.65325	11	1.4925		16	2.94425	10.0633		2	37.9784	5	30.7553	35.2204	11	42.9013		16	43.616	43.6746		2	19.0148	5	17.6132	19.5104	11	19.1694		16	23.7882	27.0279
		3	2.66608	6	6.50064	8.98642	12	2.7135		17	3.90733	2.7913		3	42.8475	6	49.5473	60.7082	12	47.15		17	54.5558	38.8426		3	19.114	6	46.2967	45.0652	12	18.3818		17	25.1185	21.8386
				7	1.14352		13	2.64706		18	4.74301	9.30532				7	32.8805		13	45.7969		18	58.4117	63.9343				7	20.1923		13	23.0799		18	43.2679	47.5463
				8	3.41174		14	3.18205		19	4.7017	13.4314				8	15.7243		14	41.7172		19	48.7573	46.8492				8	17.5419		14	21.5175		19	27.9144	29.7578
				9	3.89212					20a	6.10984	16.6313				9	42.2778					20a	34.7768	52.0591				9	25.3004					20a	27.2156	29.8084
										20b		13.1486										20b		44.9429										20b		31.2058
										21a	3.50077	18.3065										21a	46.2206	51.5786										21a	28.4897	37.5341
										21b		14.4769										21b		33.0445										21b		28.1125
		Average	1.77694	Average	2.96495	6.06897	Average	2.4888		Average	4.58424	11.9315		Average	39.1465	Average	33.5955	42.6238	Average	45.6399		Average	49.5915	48.4183		Average	22.3732	Average	25.1247	31.2055	Average	20.7502		Average	31.5294	32.9419
		SD	1.53888	SD	2.08362	2.70175	SD	0.623528		SD	1.2412	4.66601		SD	3.27707	SD	11.5593	15.7472	SD	3.54032		SD	9.08628	9.89536		SD	5.7313	SD	10.8469	12.9142	SD	1.92686		SD	8.74476	8.31783
		% Malate 13C enrichment normalized to serum 13C-glucose enrichment												% Glycine 13C enrichment normalized to serum 13C-glucose enrichment												% Aspartate 13C enrichment normalized to serum 13C-glucose enrichment
		CD+Vehicle		CD+DEN			HFD-Vehicle			HFD+DEN				CD+Vehicle		CD+DEN			HFD-Vehicle			HFD+DEN				CD+Vehicle		CD+DEN			HFD-Vehicle			HFD+DEN
		Mouse	Liver	Mouse	Liver	Tumor	Mouse	Liver	Tumor	Mouse	Liver	Tumor		Mouse	Liver	Mouse	Liver	Tumor	Mouse	Liver	Tumor	Mouse	Liver	Tumor		Mouse	Liver	Mouse	Liver	Tumor	Mouse	Liver	Tumor	Mouse	Liver	Tumor
		1	29.7421	4	20.9781	29.849	10	26.3546	34.4458	15	45.9365	44.7241		1	3.4676	4	3.62153	5.33968	10	3.16016	5.93813	15	5.76808	7.69078		1	29.1988	4	21.3681	25.9523	10	23.6953	32.2906	15	34.4841	35.8978
		2	19.3024	5	18.153	20.2416	11	22.1563		16	23.7843	32.0563		2	2.3843	5	2.56294	3.53997	11	2.04821		16	3.24987	7.31534		2	34.9262	5	14.889	19.8734	11	17.8767		16	17.9998	28.0505
		3	18.4703	6	45.1984	47.9061	12	22.3307		17	26.5029	22.2495		3	2.97639	6	5.72468	8.45389	12	2.78308		17	3.40496	3.62823		3	17.6537	6	38.9206	41.2252	12	15.3433		17	23.6984	27.8254
				7	21.3472		13	26.0453		18	43	49.921				7	2.83139		13	2.52312		18	3.98207	9.25002				7	18.5816		13	20.685		18	38.12	44.3835
				8	16.5703		14	30.6375		19	27.5463	32.8305				8	3.54966		14	2.58162		19	4.07188	9.76749				8	13.9186		14	30.4365		19	22.493	25.7986
				9	27.5049					20a	25.2851	33.2151				9	3.70842					20a	5.29928	14.2702				9	25.5899					20a	25.9475	32.3981
										20b		33.5335										20b		11.772										20b		32.3981
										21a	26.147	42.598										21a	3.75704	13.4615										21a	27.4915	37.3093
										21b		33.0228										21b		11.01										21b		31.1805
		Average	22.5049	Average	24.9586	32.6656	Average	25.5048		Average	31.1717	36.0168		Average	2.94276	Average	3.66644	5.77785	Average	2.61924		Average	4.21903	9.79617		Average	27.2596	Average	22.2113	29.017	Average	21.6073		Average	27.1763	32.8046
		SD	6.28138	SD	10.599	14.0457	SD	3.48735		SD	9.19531	8.2977		SD	0.542434	SD	1.11075	2.48609	SD	0.405022		SD	0.953915	3.31207		SD	8.79806	SD	9.23997	11.0008	SD	5.83783		SD	6.98828	5.73778
HCC tumor and adjacent normal liver tissue mass isotopomer MDVs in 13C-glucose infused mice																								*	*							*	*	*	*
Diet		CD	CD	CD	CD	CD	CD	CD	CD	CD	CD	CD	CD	HFD	HFD	HFD	HFD	HFD	HFD	HFD	HFD	HFD	HFD	HFD	HFD	HFD	HFD	HFD	HFD	HFD	HFD	HFD	HFD	HFD	HFD
Mouse		1	2	3	4	5	6	7	8	9	4	5	6	10	11	12	13	14	15	16	17	18	19	20	21	10	15	16	17	18	19	20a	20b	21a	21b
Injection at 2wks		Vehicle	Vehicle	Vehicle	DEN	DEN	DEN	DEN	DEN	DEN	DEN	DEN	DEN	Vehicle	Vehicle	Vehicle	Vehicle	Vehicle	DEN	DEN	DEN	DEN	DEN	DEN	DEN	Vehicle	DEN	DEN	DEN	DEN	DEN	DEN	DEN	DEN	DEN
Tissue		liver	liver	liver	liver	liver	liver	liver	liver	liver	tumor	tumor	tumor	liver	liver	liver	liver	liver	liver	liver	liver	liver	liver	liver	liver	tumor	tumor	tumor	tumor	tumor	tumor	tumor	tumor	tumor	tumor
blood glucose enrichment		0.529132	0.293588	0.268782	0.244397	0.35311	0.150227	0.201315	0.242301	0.535269	0.244397	0.35311	0.150227	0.419282	0.524848	0.431177	0.376518	0.615893	0.221044	0.398478	0.447876	0.241081	0.33277	0.132093	0.344686	0.419282	0.221044	0.398478	0.447876	0.241081	0.33277	0.132093	0.132093	0.344686	0.344686
serine	M+0	0.9667	1.007	0.9866	0.9979	0.9873	0.9812	0.9945	0.9815	0.9518	0.985	0.9702	0.9729	0.9809	0.9807	0.9786	0.9776	0.955	0.9746	0.9725	0.96	0.9774	0.9668	0.9789	0.9778	0.9224	0.9587	0.9116	0.9769	0.9539	0.8981	0.9453	0.9595	0.8673	0.883
	M+1	0.0243	0	0.0072	0.0049	0.009	0.0095	0.0059	0.014	0.038	0.0268	0.0239	0.017	0.011	0.0159	0.0096	0.0159	0.0327	0.0138	0.0207	0.0281	0.0133	0.0211	0.019	0.009	0.0564	0.0257	0.0632	0.0144	0.0289	0.0747	0.0445	0.0299	0.0883	0.0863
	M+2	0.009	0	0.004	0	0.0032	0.0078	0.0005	0.0027	0.0061	0	0.0029	0.0068	0.005	0.0026	0.0099	0.0055	0.0105	0.0076	0.0056	0.0113	0.0072	0.0129	0.0026	0.0124	0.0168	0.0113	0.0185	0.0115	0.0132	0.0219	0.0095	0.0099	0.0322	0.0287
	M+3	0	0	0.0021	0.0014	0.0005	0.0014	0	0.0018	0.0041	0.0049	0.003	0.0033	0.0031	0.0008	0.0019	0.001	0.0017	0.004	0.0011	0.0006	0.0022	0	0	0.0008	0.0043	0.0043	0.0067	0	0.004	0.0052	0.0008	0.0008	0.0122	0.002
Fractional Abundance		0.0141	0	0.00716595	0.00304607	0.00563333	0.00976569	0.00230207	0.00826667	0.0208333	0.0140643	0.0129	0.0135	0.0101	0.00783333	0.0117	0.00996667	0.019598	0.0136667	0.0117322	0.0175	0.0114345	0.0156458	0.0080707	0.0120667	0.0342966	0.0204	0.0401	0.0125016	0.0224333	0.0446955	0.0219689	0.0173684	0.0631	0.0499
Blood glucose normalized (%)		2.66474	0	2.66608	1.24637	1.59535	6.50064	1.14352	3.41174	3.89212	5.75472	3.65325	8.98642	2.40888	1.4925	2.7135	2.64706	3.18205	6.18278	2.94425	3.90733	4.74301	4.7017	6.10984	3.50077	8.17984	9.22893	10.0633	2.7913	9.30532	13.4314	16.6313	13.1486	18.3065	14.4769
pyruvate	M+0	0.7532	0.8534	0.8517	0.9001	0.848	0.9058	0.9054	0.9426	0.7035	0.8892	0.8279	0.8773	0.723	0.7095	0.7347	0.778	0.6796	0.8288	0.7767	0.6914	0.8117	0.7856	0.93	0.7888	0.6999	0.8247	0.7666	0.7695	0.7981	0.7892	0.892	0.9089	0.7672	0.8323
	M+1	0.0583	0.0409	0.0381	0.0287	0.0519	0.0219	0.0354	0.024	0.0801	0.0402	0.0549	0.0381	0.0698	0.0687	0.0688	0.0531	0.0678	0.0409	0.0525	0.0683	0.053	0.0569	0.0313	0.0593	0.0844	0.0455	0.0667	0.0606	0.0537	0.0635	0.0487	0.037	0.0606	0.0634
	M+2	0.0426	0.0235	0.0232	0.0195	0.0264	0.0155	0.0141	0.0099	0.0504	0.0178	0.0334	0.0183	0.0545	0.0586	0.0484	0.0425	0.0548	0.0286	0.0435	0.0558	0.0361	0.043	0.0099	0.0374	0.0555	0.0318	0.0447	0.0484	0.0359	0.0377	0.0203	0.0212	0.0442	0.0346
	M+3	0.1459	0.0822	0.087	0.0517	0.0737	0.0568	0.045	0.0235	0.166	0.0528	0.0838	0.0663	0.1527	0.1632	0.1481	0.1264	0.1978	0.1017	0.1273	0.1844	0.0991	0.1146	0.0289	0.1146	0.1603	0.0981	0.122	0.1215	0.1123	0.1096	0.039	0.0329	0.1281	0.0697
Fractional Abundance		0.193733	0.1115	0.115167	0.0742667	0.1086	0.0744333	0.0661934	0.0381	0.2263	0.0780667	0.124367	0.0912	0.2123	0.225167	0.2033	0.172433	0.256933	0.1344	0.1738	0.244342	0.140819	0.16225	0.0459379	0.159316	0.225456	0.13448	0.174033	0.173967	0.154133	0.1559	0.0687667	0.0593667	0.177784	0.1139
Blood glucose normalized (%)		36.6135	37.9784	42.8475	30.3878	30.7553	49.5473	32.8805	15.7243	42.2778	31.9426	35.2204	60.7082	50.6342	42.9013	47.15	45.7969	41.7172	60.8024	43.616	54.5558	58.4117	48.7573	34.7768	46.2206	53.7719	60.8386	43.6746	38.8426	63.9343	46.8492	52.0591	44.9429	51.5786	33.0445
succinate	M+0	0.6607	0.8628	0.8691	0.8467	0.8417	0.8393	0.8881	0.8826	0.6972	0.8185	0.8278	0.8389	0.7832	0.7648	0.8094	0.7951	0.7107	0.7854	0.7713	0.7344	0.7654	0.7798	0.9095	0.7615	0.7194	0.782	0.7468	0.7627	0.7346	0.7656	0.8978	0.8945	0.6997	0.7642
	M+1	0.1528	0.0753	0.0725	0.0901	0.09	0.0866	0.0728	0.0755	0.1397	0.1026	0.0943	0.0857	0.0976	0.1102	0.094	0.1015	0.1016	0.0967	0.1165	0.1277	0.1119	0.1107	0.0511	0.1237	0.1264	0.1037	0.123	0.1248	0.1307	0.1144	0.061	0.061	0.14	0.1233
	M+2	0.1143	0.0396	0.0434	0.0489	0.0473	0.0343	0.0285	0.0325	0.0978	0.0575	0.0541	0.044	0.0958	0.0865	0.0696	0.0682	0.1431	0.0585	0.0777	0.0962	0.0691	0.0709	0.026	0.0796	0.1108	0.065	0.0882	0.0755	0.0826	0.0823	0.0277	0.0298	0.1109	0.0776
	M+3	0.0566	0.0204	0.0138	0.0124	0.0194	0.0362	0.0096	0.0085	0.0548	0.0193	0.0217	0.0285	0.0205	0.0352	0.0246	0.0311	0.0361	0.0542	0.0303	0.0369	0.0477	0.0349	0.0129	0.0309	0.0382	0.045	0.0366	0.033	0.0458	0.0337	0.0129	0.0141	0.0419	0.0305
	M+4	0.0156	0.0019	0.0012	0.0019	0.0015	0.0036	0.001	0.001	0.0105	0.0021	0.002	0.0029	0.0029	0.0034	0.0025	0.0041	0.0085	0.0052	0.0041	0.0048	0.006	0.0036	0.0005	0.0043	0.0052	0.0043	0.0054	0.0041	0.0063	0.004	0.0006	0.0005	0.0075	0.0044
Fractional Abundance		0.1534	0.055825	0.051375	0.058175	0.0621938	0.06955	0.04065	0.0425042	0.135425	0.070975	0.0688931	0.0677	0.090575	0.10061	0.0792579	0.0869	0.132525	0.099275	0.0947905	0.1125	0.10431	0.0928907	0.03595	0.0982	0.12085	0.096475	0.1077	0.0978098	0.114625	0.099025	0.039375	0.0412209	0.129375	0.0969
Blood glucose normalized (%)		28.9909	19.0148	19.114	23.8035	17.6132	46.2967	20.1923	17.5419	25.3004	29.0409	19.5104	45.0652	21.6024	19.1694	18.3818	23.0799	21.5175	44.9119	23.7882	25.1185	43.2679	27.9144	27.2156	28.4897	28.8231	43.6452	27.0279	21.8386	47.5463	29.7578	29.8084	31.2058	37.5341	28.1125
malate	M+0	0.6462	0.8629	0.8759	0.8664	0.8393	0.8436	0.8844	0.8882	0.6787	0.8136	0.8224	0.831	0.75	0.7446	0.7809	0.7798	0.6162	0.7821	0.7767	0.7271	0.7692	0.7856	0.9137	0.7807	0.6805	0.7797	0.708	0.7637	0.7267	0.7454	0.8876	0.8892	0.6668	0.7301
	M+1	0.1719	0.0753	0.0681	0.0783	0.0918	0.0834	0.0748	0.0753	0.1477	0.1092	0.1001	0.09	0.1141	0.1134	0.1071	0.1058	0.1482	0.0974	0.1136	0.1307	0.1093	0.1066	0.0514	0.117	0.1445	0.1033	0.1459	0.1231	0.1356	0.1281	0.0669	0.064	0.1623	0.1442
	M+2	0.1018	0.0355	0.0376	0.0401	0.0438	0.0334	0.026	0.0254	0.0893	0.0515	0.0484	0.0416	0.0845	0.0794	0.0631	0.0606	0.1166	0.0577	0.0674	0.0875	0.0643	0.0664	0.0233	0.0668	0.0986	0.0638	0.0798	0.0682	0.0741	0.0753	0.0284	0.0277	0.0974	0.0724
	M+3	0.0664	0.0244	0.0179	0.0138	0.0234	0.037	0.0141	0.0099	0.0746	0.0232	0.0274	0.0345	0.0467	0.0579	0.0442	0.0495	0.1031	0.0574	0.0385	0.0497	0.0516	0.0379	0.0108	0.0321	0.0696	0.0487	0.0593	0.0409	0.0568	0.0465	0.0166	0.0182	0.0647	0.0469
	M+4	0.0137	0.0018	0.0004	0.0013	0.0017	0.0026	0.0007	0.0012	0.0097	0.0025	0.0017	0.0028	0.0047	0.0048	0.0048	0.0042	0.016	0.0053	0.0038	0.005	0.0055	0.0034	0.0008	0.0034	0.0068	0.0046	0.0069	0.0041	0.0068	0.0047	0.0005	0.0008	0.009	0.0064
Fractional Abundance		0.157375	0.0566693	0.049645	0.0512699	0.0641	0.0679	0.042975	0.04015	0.147225	0.07295	0.071475	0.0719678	0.1105	0.116287	0.0962846	0.0980652	0.188694	0.10154	0.094775	0.1187	0.103665	0.0916658	0.0334	0.090125	0.144425	0.0988599	0.127737	0.09965	0.12035	0.10925	0.043875	0.0442956	0.146829	0.113825
Blood glucose normalized (%)		29.7421	19.3024	18.4703	20.9781	18.153	45.1984	21.3472	16.5703	27.5049	29.849	20.2416	47.9061	26.3546	22.1563	22.3307	26.0453	30.6375	45.9365	23.7843	26.5029	43	27.5463	25.2851	26.147	34.4458	44.7241	32.0563	22.2495	49.921	32.8305	33.2151	33.5335	42.598	33.0228
glycine	M+0	0.9737	0.9908	0.99	0.9885	0.9889	0.9893	0.9929	0.9891	0.9719	0.9825	0.9831	0.9835	0.9828	0.9867	0.9841	0.9875	0.979	0.984	0.983	0.981	0.9882	0.9835	0.9905	0.9831	0.967	0.9798	0.9625	0.9778	0.9723	0.959	0.9734	0.9786	0.9425	0.9481
	M+1	0.0157	0.0044	0.004	0.0055	0.0041	0.0042	0.0028	0.0048	0.0165	0.0089	0.0088	0.0076	0.0079	0.0051	0.0078	0.006	0.0102	0.0065	0.0081	0.0075	0.0044	0.0059	0.005	0.0079	0.016	0.0064	0.0167	0.0119	0.0108	0.0172	0.0155	0.0117	0.0222	0.0279
	M+2	0.0105	0.0048	0.006	0.0061	0.007	0.0065	0.0043	0.0062	0.0116	0.0086	0.0081	0.0089	0.0093	0.0082	0.0081	0.0065	0.0108	0.0095	0.0089	0.0115	0.0074	0.0106	0.0045	0.009	0.0169	0.0138	0.0208	0.0103	0.0169	0.0239	0.0111	0.0097	0.0353	0.024
Fractional Abundance		0.0183482	0.007	0.008	0.00885088	0.00905	0.0086	0.0057	0.00860086	0.01985	0.01305	0.0125	0.0127	0.01325	0.01075	0.012	0.0095	0.0159	0.01275	0.01295	0.01525	0.0096	0.01355	0.007	0.01295	0.0248975	0.017	0.02915	0.01625	0.0223	0.0325032	0.01885	0.01555	0.0464	0.03795
Blood glucose normalized (%)		3.4676	2.3843	2.97639	3.62153	2.56294	5.72468	2.83139	3.54966	3.70842	5.33968	3.53997	8.45389	3.16016	2.04821	2.78308	2.52312	2.58162	5.76808	3.24987	3.40496	3.98207	4.07188	5.29928	3.75704	5.93813	7.69078	7.31534	3.62823	9.25002	9.76749	14.2702	11.772	13.4615	11.01
aspartate	M+0	0.6587	0.8664	0.8846	0.8657	0.8727	0.8649	0.8981	0.9066	0.7038	0.8249	0.8233	0.844	0.7741	0.803	0.8494	0.8255	0.6226	0.8333	0.8403	0.7784	0.7924	0.8318	0.9084	0.7821	0.7001	0.8247	0.745	0.7188	0.7573	0.8048	0.8916	0.8923	0.7033	0.7449
	M+1	0.1628	0.003	0.0591	0.075	0.0591	0.0713	0.0652	0.0616	0.1355	0.1154	0.1057	0.0867	0.1049	0.0988	0.0729	0.0862	0.145	0.0745	0.0656	0.0977	0.0959	0.0808	0.0532	0.0986	0.1357	0.0769	0.1268	0.1308	0.1214	0.0948	0.0643	0.0626	0.1452	0.1374
	M+2	0.0951	0.1265	0.0392	0.0485	0.0595	0.031	0.0263	0.0234	0.0812	0.0473	0.0404	0.0495	0.0744	0.071	0.0447	0.0449	0.1119	0.0487	0.0633	0.0557	0.0659	0.0477	0.032	0.0837	0.0937	0.0607	0.0702	0.0926	0.0635	0.0593	0.0271	0.027	0.0935	0.0672
	M+3	0.0686	0.0459	0.0161	0.0122	0.0106	0.0302	0.0106	0.0071	0.068	0.0144	0.0282	0.0176	0.0427	0.0429	0.0301	0.0385	0.1005	0.041	0.0285	0.0569	0.0433	0.0356	0.0057	0.0298	0.064	0.0317	0.0521	0.0604	0.0516	0.0344	0.0149	0.0174	0.0498	0.0439
	M+4	0.0148	0	0.001	0	0	0.0025	0	0.0013	0.0115	0	0.0024	0.0023	0.0039	0	0.003	0.005	0.0199	0.0025	0.0023	0.0112	0.0025	0.0041	0.0007	0.0059	0.0066	0.006	0.0059	0	0.0062	0.0067	0.002	0.0006	0.0082	0.0066
Fractional Abundance		0.1545	0.102539	0.04745	0.052223	0.0525747	0.0584692	0.0374075	0.033725	0.136975	0.0634266	0.070175	0.0619312	0.09935	0.0938253	0.0661566	0.0778828	0.187456	0.076225	0.071725	0.106139	0.0919	0.07485	0.034275	0.0947595	0.135389	0.07935	0.111775	0.124623	0.107	0.08585	0.0427957	0.0427957	0.1286	0.107475
Blood glucose normalized (%)		29.1988	34.9262	17.6537	21.3681	14.889	38.9206	18.5816	13.9186	25.5899	25.9523	19.8734	41.2252	23.6953	17.8767	15.3433	20.685	30.4365	34.4841	17.9998	23.6984	38.12	22.493	25.9475	27.4915	32.2906	35.8978	28.0505	27.8254	44.3835	25.7986	32.3981	32.3981	37.3093	31.1805

## Sheet: table S10
Sample Comparison	Lipid Species	Lipid Class	Log FC	p-value	FDR adjusted p-value
HFD-DEN-Liver_CD_Vehicle_Liver	PC(14:1/18:3)	Phosphatidylcholine	-2.28957	4.73e-06	0.00614882
HFD-DEN-Liver_CD_Vehicle_Liver	PE(18:3/20:4)	Phosphatidylethanolamine	-1.70601	1.445e-05	0.00940177
HFD-DEN-Liver_CD_Vehicle_Liver	SM(d18:1/18:0)	Sphingomyelins	0.978215	0.00056284	0.0140767
HFD-DEN-Liver_CD_Vehicle_Liver	Cer(d18:0/22:0)	Ceramides	2.03743	0.00021024	0.0140767
HFD-DEN-Liver_CD_Vehicle_Liver	HexCer(d18:1/14:1)	Hexosylceramides	-1.12257	0.00046991	0.0140767
HFD-DEN-Liver_CD_Vehicle_Liver	TG(50:0/FA18:0)	Triacylglycerides	3.47994	0.00062009	0.0140767
HFD-DEN-Liver_CD_Vehicle_Liver	TG(52:2/FA20:2)	Triacylglycerides	3.06129	0.00030074	0.0140767
HFD-DEN-Liver_CD_Vehicle_Liver	TG(54:6/FA22:6)	Triacylglycerides	4.52386	0.00071734	0.0140767
HFD-DEN-Liver_CD_Vehicle_Liver	TG(52:5/FA20:4)	Triacylglycerides	2.87363	0.00036645	0.0140767
HFD-DEN-Liver_CD_Vehicle_Liver	TG(54:3/FA22:2)	Triacylglycerides	2.86119	0.00031083	0.0140767
HFD-DEN-Liver_CD_Vehicle_Liver	TG(54:6/FA22:5)	Triacylglycerides	3.14095	0.00070467	0.0140767
HFD-DEN-Liver_CD_Vehicle_Liver	TG(52:3/FA18:0)	Triacylglycerides	3.11009	0.00070208	0.0140767
HFD-DEN-Liver_CD_Vehicle_Liver	TG(54:4/FA20:4)	Triacylglycerides	4.18554	0.00053179	0.0140767
HFD-DEN-Liver_CD_Vehicle_Liver	TG(54:4/FA20:3)	Triacylglycerides	3.7837	0.00070309	0.0140767
HFD-DEN-Liver_CD_Vehicle_Liver	TG(56:4/FA22:2)	Triacylglycerides	3.15955	0.00046374	0.0140767
HFD-DEN-Liver_CD_Vehicle_Liver	TG(54:6/FA20:3)	Triacylglycerides	2.77536	0.00036138	0.0140767
HFD-DEN-Liver_CD_Vehicle_Liver	TG(56:5/FA22:2)	Triacylglycerides	3.2816	0.00043792	0.0140767
HFD-DEN-Liver_CD_Vehicle_Liver	TG(58:8/FA20:4)	Triacylglycerides	3.04777	0.00070903	0.0140767
HFD-DEN-Liver_CD_Vehicle_Liver	TG(58:11/FA16:0)	Triacylglycerides	3.80466	7.956e-05	0.0140767
HFD-DEN-Liver_CD_Vehicle_Liver	TG(60:6/FA16:0)	Triacylglycerides	4.17037	0.00072331	0.0140767
HFD-DEN-Liver_CD_Vehicle_Liver	TG(60:9/FA16:0)	Triacylglycerides	3.84976	0.00046914	0.0140767
HFD-DEN-Liver_CD_Vehicle_Liver	TG(60:11/FA16:0)	Triacylglycerides	4.57582	0.0002433	0.0140767
HFD-DEN-Liver_CD_Vehicle_Liver	TG(56:6/FA16:1)	Triacylglycerides	3.9105	0.00042254	0.0140767
HFD-DEN-Liver_CD_Vehicle_Liver	TG(56:8/FA16:1)	Triacylglycerides	4.06949	0.00065612	0.0140767
HFD-DEN-Liver_CD_Vehicle_Liver	TG(56:6/FA22:2)	Triacylglycerides	3.06572	0.00056636	0.0140767
HFD-DEN-Liver_CD_Vehicle_Liver	TG(56:9/FA22:5)	Triacylglycerides	2.67427	0.00045142	0.0140767
HFD-DEN-Liver_CD_Vehicle_Liver	TG(58:8/FA20:5)	Triacylglycerides	2.92207	0.00068598	0.0140767
HFD-DEN-Liver_CD_Vehicle_Liver	TG(58:10/FA22:4)	Triacylglycerides	2.56395	0.00013867	0.0140767
HFD-DEN-Liver_CD_Vehicle_Liver	TG(60:9/FA22:2)	Triacylglycerides	3.07807	0.00068124	0.0140767
HFD-DEN-Liver_CD_Vehicle_Liver	TG(60:12/FA22:5)	Triacylglycerides	3.23598	0.00056533	0.0140767
HFD-DEN-Liver_CD_Vehicle_Liver	TG(58:4/FA18:0)	Triacylglycerides	3.8367	0.0002692	0.0140767
HFD-DEN-Liver_CD_Vehicle_Liver	TG(56:3/FA20:2)	Triacylglycerides	3.58689	0.00043149	0.0140767
HFD-DEN-Liver_CD_Vehicle_Liver	TG(56:5/FA20:4)	Triacylglycerides	4.2679	0.000298	0.0140767
HFD-DEN-Liver_CD_Vehicle_Liver	TG(58:6/FA22:5)	Triacylglycerides	4.5988	0.00061523	0.0140767
HFD-DEN-Liver_CD_Vehicle_Liver	TG(56:8/FA18:0)	Triacylglycerides	3.21091	0.00024351	0.0140767
HFD-DEN-Liver_CD_Vehicle_Liver	TG(58:9/FA18:3)	Triacylglycerides	2.00777	0.00072493	0.0140767
HFD-DEN-Liver_CD_Vehicle_Liver	TG(60:9/FA20:4)	Triacylglycerides	3.41191	0.00049556	0.0140767
HFD-DEN-Liver_CD_Vehicle_Liver	TG(60:10/FA18:0)	Triacylglycerides	3.74478	0.0005022	0.0140767
HFD-DEN-Liver_CD_Vehicle_Liver	TG(60:10/FA20:4)	Triacylglycerides	3.84546	0.0005703	0.0140767
HFD-DEN-Liver_CD_Vehicle_Liver	TG(62:9/FA22:4)	Triacylglycerides	3.13633	0.00036494	0.0140767
HFD-DEN-Liver_CD_Vehicle_Liver	TG(62:10/FA22:6)	Triacylglycerides	4.21604	0.00071732	0.0140767
HFD-DEN-Liver_CD_Vehicle_Liver	TG(62:11/FA22:5)	Triacylglycerides	4.34501	0.00038177	0.0140767
HFD-DEN-Liver_CD_Vehicle_Liver	TG(60:8/FA20:5)	Triacylglycerides	3.16947	0.00034852	0.0140767
HFD-DEN-Liver_CD_Vehicle_Liver	TG(58:12/FA18:2)	Triacylglycerides	2.82854	0.00011761	0.0140767
HFD-DEN-Liver_CD_Vehicle_Liver	TG(62:13/FA22:5)	Triacylglycerides	3.5256	5.172e-05	0.0140767
HFD-DEN-Liver_CD_Vehicle_Liver	TG(60:11/FA20:2)	Triacylglycerides	3.63539	0.00010902	0.0140767
HFD-DEN-Liver_CD_Vehicle_Liver	TG(64:14/FA22:6)	Triacylglycerides	3.34692	0.00066228	0.0140767
HFD-DEN-Liver_CD_Vehicle_Liver	PC(14:1/20:3)	Phosphatidylcholine	-2.33977	0.0003576	0.0140767
HFD-DEN-Liver_CD_Vehicle_Liver	PC(16:0/20:3)	Phosphatidylcholine	0.811476	0.00054194	0.0140767
HFD-DEN-Liver_CD_Vehicle_Liver	PC(16:1/18:2)	Phosphatidylcholine	-1.06936	8.842e-05	0.0140767
HFD-DEN-Liver_CD_Vehicle_Liver	PC(18:0/20:3)	Phosphatidylcholine	1.0315	6.376e-05	0.0140767
HFD-DEN-Liver_CD_Vehicle_Liver	PC(18:1/18:3)	Phosphatidylcholine	-1.03954	6.057e-05	0.0140767
HFD-DEN-Liver_CD_Vehicle_Liver	PC(18:2/18:3)	Phosphatidylcholine	-1.64559	0.00033634	0.0140767
HFD-DEN-Liver_CD_Vehicle_Liver	PC(18:2/22:6)	Phosphatidylcholine	-1.16782	0.00024437	0.0140767
HFD-DEN-Liver_CD_Vehicle_Liver	PC(O-16:0/20:3)	1-alkyl,Phosphatidylcholine	0.802612	0.00046226	0.0140767
HFD-DEN-Liver_CD_Vehicle_Liver	PC(O-18:0/20:3)	1-alkyl,Phosphatidylcholine	1.02327	0.00032998	0.0140767
HFD-DEN-Liver_CD_Vehicle_Liver	PE(16:1/20:2)	Phosphatidylethanolamine	-1.50224	0.00042107	0.0140767
HFD-DEN-Liver_CD_Vehicle_Liver	PE(18:0/20:3)	Phosphatidylethanolamine	0.809563	8.306e-05	0.0140767
HFD-DEN-Liver_CD_Vehicle_Liver	PE(18:0/22:6)	Phosphatidylethanolamine	0.550178	0.00064841	0.0140767
HFD-DEN-Liver_CD_Vehicle_Liver	PE(18:3/20:1)	Phosphatidylethanolamine	-1.1883	0.00072088	0.0140767
HFD-DEN-Liver_CD_Vehicle_Liver	PE(18:3/20:3)	Phosphatidylethanolamine	-1.73625	0.00033126	0.0140767
HFD-DEN-Liver_CD_Vehicle_Liver	PE(18:3/22:4)	Phosphatidylethanolamine	-1.4235	0.00016526	0.0140767
HFD-DEN-Liver_CD_Vehicle_Liver	PE(18:3/22:6)	Phosphatidylethanolamine	-2.48189	0.00012428	0.0140767
HFD-DEN-Liver_CD_Vehicle_Liver	PE(20:4/22:0)	Phosphatidylethanolamine	0.645308	0.00026539	0.0140767
HFD-DEN-Liver_CD_Vehicle_Liver	PG(18:2/18:2)	Phosphatidylglycerol	-1.25492	0.00068921	0.0140767
HFD-DEN-Liver_CD_Vehicle_Liver	PG(18:2/18:3)	Phosphatidylglycerol	-3.48047	0.00047603	0.0140767
HFD-DEN-Liver_CD_Vehicle_Liver	PI(18:2/18:2)	Phosphatidylinositol	-2.34078	0.00042842	0.0140767
HFD-DEN-Liver_CD_Vehicle_Liver	TG(54:7/FA22:6)	Triacylglycerides	3.38889	0.0007378	0.0141159
HFD-DEN-Liver_CD_Vehicle_Liver	PG(14:1/16:1)	Phosphatidylglycerol	-1.56225	0.00075907	0.0143123
HFD-DEN-Liver_CD_Vehicle_Liver	Cer(d18:1/18:3)	Ceramides	1.25171	0.00080581	0.0146503
HFD-DEN-Liver_CD_Vehicle_Liver	TG(60:12/FA16:0)	Triacylglycerides	4.58439	0.00079477	0.0146503
HFD-DEN-Liver_CD_Vehicle_Liver	TG(62:12/FA20:3)	Triacylglycerides	2.74548	0.00081078	0.0146503
HFD-DEN-Liver_CD_Vehicle_Liver	SM(d18:1/16:0)	Sphingomyelins	0.596926	0.00098808	0.0147435
HFD-DEN-Liver_CD_Vehicle_Liver	TG(50:2/FA18:2)	Triacylglycerides	2.87837	0.00109741	0.0147435
HFD-DEN-Liver_CD_Vehicle_Liver	TG(54:5/FA16:0)	Triacylglycerides	3.57028	0.00098617	0.0147435
HFD-DEN-Liver_CD_Vehicle_Liver	TG(52:2/FA18:0)	Triacylglycerides	3.48312	0.00121217	0.0147435
HFD-DEN-Liver_CD_Vehicle_Liver	TG(52:2/FA18:2)	Triacylglycerides	3.77262	0.001271	0.0147435
HFD-DEN-Liver_CD_Vehicle_Liver	TG(56:5/FA18:0)	Triacylglycerides	4.03517	0.00090332	0.0147435
HFD-DEN-Liver_CD_Vehicle_Liver	TG(56:6/FA18:0)	Triacylglycerides	3.20969	0.00126435	0.0147435
HFD-DEN-Liver_CD_Vehicle_Liver	TG(56:3/FA22:2)	Triacylglycerides	3.7379	0.00102656	0.0147435
HFD-DEN-Liver_CD_Vehicle_Liver	TG(56:6/FA22:5)	Triacylglycerides	4.30999	0.00124136	0.0147435
HFD-DEN-Liver_CD_Vehicle_Liver	TG(56:7/FA16:0)	Triacylglycerides	4.23349	0.00100716	0.0147435
HFD-DEN-Liver_CD_Vehicle_Liver	TG(56:7/FA18:1)	Triacylglycerides	3.97127	0.00127154	0.0147435
HFD-DEN-Liver_CD_Vehicle_Liver	TG(54:5/FA20:3)	Triacylglycerides	3.42314	0.00132214	0.0147435
HFD-DEN-Liver_CD_Vehicle_Liver	TG(56:7/FA22:5)	Triacylglycerides	3.28841	0.00120334	0.0147435
HFD-DEN-Liver_CD_Vehicle_Liver	TG(56:8/FA22:6)	Triacylglycerides	3.3712	0.00108222	0.0147435
HFD-DEN-Liver_CD_Vehicle_Liver	TG(56:7/FA22:4)	Triacylglycerides	3.17462	0.00128678	0.0147435
HFD-DEN-Liver_CD_Vehicle_Liver	TG(60:8/FA22:4)	Triacylglycerides	3.47848	0.00100515	0.0147435
HFD-DEN-Liver_CD_Vehicle_Liver	TG(60:9/FA22:5)	Triacylglycerides	3.75679	0.00114717	0.0147435
HFD-DEN-Liver_CD_Vehicle_Liver	TG(60:10/FA22:5)	Triacylglycerides	3.91299	0.00088915	0.0147435
HFD-DEN-Liver_CD_Vehicle_Liver	TG(60:11/FA22:5)	Triacylglycerides	4.08218	0.00134371	0.0147435
HFD-DEN-Liver_CD_Vehicle_Liver	TG(54:6/FA22:4)	Triacylglycerides	2.15865	0.0013311	0.0147435
HFD-DEN-Liver_CD_Vehicle_Liver	TG(56:7/FA16:1)	Triacylglycerides	3.62849	0.00115273	0.0147435
HFD-DEN-Liver_CD_Vehicle_Liver	TG(56:7/FA18:0)	Triacylglycerides	3.51507	0.00122717	0.0147435
HFD-DEN-Liver_CD_Vehicle_Liver	TG(58:9/FA16:1)	Triacylglycerides	2.33083	0.00092789	0.0147435
HFD-DEN-Liver_CD_Vehicle_Liver	TG(60:7/FA22:4)	Triacylglycerides	4.38403	0.00138062	0.0147435
HFD-DEN-Liver_CD_Vehicle_Liver	TG(60:9/FA22:6)	Triacylglycerides	4.10176	0.00124197	0.0147435
HFD-DEN-Liver_CD_Vehicle_Liver	TG(58:2/FA18:0)	Triacylglycerides	4.48908	0.00107458	0.0147435
HFD-DEN-Liver_CD_Vehicle_Liver	TG(56:6/FA20:5)	Triacylglycerides	3.93129	0.00133858	0.0147435
HFD-DEN-Liver_CD_Vehicle_Liver	TG(62:11/FA22:6)	Triacylglycerides	4.12009	0.00102896	0.0147435
HFD-DEN-Liver_CD_Vehicle_Liver	TG(58:8/FA18:1)	Triacylglycerides	3.99368	0.00127657	0.0147435
HFD-DEN-Liver_CD_Vehicle_Liver	TG(62:9/FA22:6)	Triacylglycerides	4.62376	0.0012811	0.0147435
HFD-DEN-Liver_CD_Vehicle_Liver	TG(62:11/FA22:4)	Triacylglycerides	4.34498	0.00136239	0.0147435
HFD-DEN-Liver_CD_Vehicle_Liver	TG(60:12/FA18:2)	Triacylglycerides	2.48887	0.00112118	0.0147435
HFD-DEN-Liver_CD_Vehicle_Liver	TG(60:14/FA22:6)	Triacylglycerides	3.55861	0.00090951	0.0147435
HFD-DEN-Liver_CD_Vehicle_Liver	TG(62:9/FA20:4)	Triacylglycerides	3.11226	0.00095586	0.0147435
HFD-DEN-Liver_CD_Vehicle_Liver	PC(14:1/16:1)	Phosphatidylcholine	-1.28894	0.00129289	0.0147435
HFD-DEN-Liver_CD_Vehicle_Liver	PC(14:1/18:0)	Phosphatidylcholine	0.628745	0.0008847	0.0147435
HFD-DEN-Liver_CD_Vehicle_Liver	PC(18:0/18:0)	Phosphatidylcholine	0.371437	0.00133126	0.0147435
HFD-DEN-Liver_CD_Vehicle_Liver	PC(O-20:0/20:4)	1-alkyl,Phosphatidylcholine	0.618884	0.00112125	0.0147435
HFD-DEN-Liver_CD_Vehicle_Liver	PC(P-20:0/20:3)	1-alkenyl,Phosphatidylcholine	1.97532	0.00088002	0.0147435
HFD-DEN-Liver_CD_Vehicle_Liver	PE(14:0/16:0)	Phosphatidylethanolamine	-1.55585	0.00133386	0.0147435
HFD-DEN-Liver_CD_Vehicle_Liver	PE(14:0/22:6)	Phosphatidylethanolamine	-1.54584	0.00138256	0.0147435
HFD-DEN-Liver_CD_Vehicle_Liver	PE(16:1/22:4)	Phosphatidylethanolamine	-0.846967	0.00086634	0.0147435
HFD-DEN-Liver_CD_Vehicle_Liver	PE(18:1/18:2)	Phosphatidylethanolamine	-0.406524	0.00105305	0.0147435
HFD-DEN-Liver_CD_Vehicle_Liver	PE(18:1/18:3)	Phosphatidylethanolamine	-1.77674	0.00122741	0.0147435
HFD-DEN-Liver_CD_Vehicle_Liver	PE(20:2/20:2)	Phosphatidylethanolamine	-0.970899	0.00109981	0.0147435
HFD-DEN-Liver_CD_Vehicle_Liver	PE(20:4/20:4)	Phosphatidylethanolamine	-0.606192	0.00103327	0.0147435
HFD-DEN-Liver_CD_Vehicle_Liver	PE(P-16:0/18:3)	1-alkenyl,Phosphoethanolamine	-1.65437	0.00096897	0.0147435
HFD-DEN-Liver_CD_Vehicle_Liver	PE(P-18:0/20:4)	1-alkenyl,Phosphoethanolamine	0.71365	0.00115989	0.0147435
HFD-DEN-Liver_CD_Vehicle_Liver	PG(16:1/18:3)	Phosphatidylglycerol	-1.98222	0.00125828	0.0147435
HFD-DEN-Liver_CD_Vehicle_Liver	PS(18:1/20:4)	Phosphatidylserine	-0.935551	0.00136041	0.0147435
HFD-DEN-Liver_CD_Vehicle_Liver	PC(18:1/20:5)	Phosphatidylcholine	-0.527887	0.0014058	0.0148694
HFD-DEN-Liver_CD_Vehicle_Liver	TG(52:3/FA18:2)	Triacylglycerides	3.07452	0.0014876	0.0149291
HFD-DEN-Liver_CD_Vehicle_Liver	TG(54:5/FA20:4)	Triacylglycerides	3.88559	0.00144099	0.0149291
HFD-DEN-Liver_CD_Vehicle_Liver	TG(58:8/FA20:3)	Triacylglycerides	3.47397	0.00142602	0.0149291
HFD-DEN-Liver_CD_Vehicle_Liver	TG(54:7/FA22:5)	Triacylglycerides	2.56341	0.00152619	0.0149291
HFD-DEN-Liver_CD_Vehicle_Liver	TG(60:8/FA18:0)	Triacylglycerides	3.89475	0.00152132	0.0149291
HFD-DEN-Liver_CD_Vehicle_Liver	PE(14:1/18:0)	Phosphatidylethanolamine	0.636998	0.00151503	0.0149291
HFD-DEN-Liver_CD_Vehicle_Liver	PE(18:3/20:2)	Phosphatidylethanolamine	-2.11265	0.00147057	0.0149291
HFD-DEN-Liver_CD_Vehicle_Liver	PE(20:3/22:0)	Phosphatidylethanolamine	1.43878	0.00151012	0.0149291
HFD-DEN-Liver_CD_Vehicle_Liver	PE(O-16:0/18:2)	1-alkyl,Phosphoethanolamine	-0.810095	0.00151882	0.0149291
HFD-DEN-Liver_CD_Vehicle_Liver	PG(18:0/20:2)	Phosphatidylglycerol	1.16031	0.00146008	0.0149291
HFD-DEN-Liver_CD_Vehicle_Liver	TG(56:5/FA16:0)	Triacylglycerides	4.00595	0.0015417	0.0149683
HFD-DEN-Liver_CD_Vehicle_Liver	TG(60:8/FA20:4)	Triacylglycerides	2.7211	0.0015579	0.0150136
HFD-DEN-Liver_CD_Vehicle_Liver	TG(52:3/FA20:3)	Triacylglycerides	3.72273	0.00163312	0.015135
HFD-DEN-Liver_CD_Vehicle_Liver	TG(54:7/FA16:1)	Triacylglycerides	3.01005	0.00161723	0.015135
HFD-DEN-Liver_CD_Vehicle_Liver	TG(54:4/FA18:0)	Triacylglycerides	2.94343	0.0016154	0.015135
HFD-DEN-Liver_CD_Vehicle_Liver	TG(56:5/FA22:4)	Triacylglycerides	4.30815	0.00165193	0.015135
HFD-DEN-Liver_CD_Vehicle_Liver	TG(56:4/FA20:3)	Triacylglycerides	4.24539	0.00158475	0.015135
HFD-DEN-Liver_CD_Vehicle_Liver	TG(60:11/FA18:2)	Triacylglycerides	2.86349	0.00164327	0.015135
HFD-DEN-Liver_CD_Vehicle_Liver	PC(14:0/14:1)	Phosphatidylcholine	-1.40603	0.00161798	0.015135
HFD-DEN-Liver_CD_Vehicle_Liver	SM(d18:1/20:5)	Sphingomyelins	1.53263	0.00195209	0.0152884
HFD-DEN-Liver_CD_Vehicle_Liver	Cer(d18:1/20:2)	Ceramides	1.4032	0.00199068	0.0152884
HFD-DEN-Liver_CD_Vehicle_Liver	TG(52:4/FA20:4)	Triacylglycerides	3.24015	0.00178596	0.0152884
HFD-DEN-Liver_CD_Vehicle_Liver	TG(54:4/FA22:4)	Triacylglycerides	3.42092	0.00194357	0.0152884
HFD-DEN-Liver_CD_Vehicle_Liver	TG(54:5/FA22:5)	Triacylglycerides	3.95986	0.00201947	0.0152884
HFD-DEN-Liver_CD_Vehicle_Liver	TG(54:6/FA16:0)	Triacylglycerides	3.55064	0.00199657	0.0152884
HFD-DEN-Liver_CD_Vehicle_Liver	TG(52:6/FA20:5)	Triacylglycerides	2.43791	0.00192013	0.0152884
HFD-DEN-Liver_CD_Vehicle_Liver	TG(52:1/FA18:1)	Triacylglycerides	5.04953	0.00183371	0.0152884
HFD-DEN-Liver_CD_Vehicle_Liver	TG(56:6/FA16:0)	Triacylglycerides	3.96289	0.0017996	0.0152884
HFD-DEN-Liver_CD_Vehicle_Liver	TG(56:6/FA18:1)	Triacylglycerides	3.73998	0.00197677	0.0152884
HFD-DEN-Liver_CD_Vehicle_Liver	TG(56:8/FA22:5)	Triacylglycerides	2.95238	0.00184913	0.0152884
HFD-DEN-Liver_CD_Vehicle_Liver	TG(58:7/FA22:4)	Triacylglycerides	3.23356	0.00176873	0.0152884
HFD-DEN-Liver_CD_Vehicle_Liver	TG(60:10/FA22:4)	Triacylglycerides	3.99039	0.00196832	0.0152884
HFD-DEN-Liver_CD_Vehicle_Liver	TG(60:10/FA22:6)	Triacylglycerides	3.95327	0.0019839	0.0152884
HFD-DEN-Liver_CD_Vehicle_Liver	TG(60:12/FA22:6)	Triacylglycerides	3.96635	0.00200612	0.0152884
HFD-DEN-Liver_CD_Vehicle_Liver	TG(54:4/FA18:3)	Triacylglycerides	2.9459	0.00184794	0.0152884
HFD-DEN-Liver_CD_Vehicle_Liver	TG(58:8/FA18:3)	Triacylglycerides	2.92318	0.00184924	0.0152884
HFD-DEN-Liver_CD_Vehicle_Liver	TG(60:7/FA20:3)	Triacylglycerides	3.76409	0.00201449	0.0152884
HFD-DEN-Liver_CD_Vehicle_Liver	TG(60:9/FA18:0)	Triacylglycerides	3.78798	0.00200247	0.0152884
HFD-DEN-Liver_CD_Vehicle_Liver	TG(60:9/FA20:5)	Triacylglycerides	3.27961	0.00194921	0.0152884
HFD-DEN-Liver_CD_Vehicle_Liver	TG(62:9/FA18:0)	Triacylglycerides	3.71643	0.00189486	0.0152884
HFD-DEN-Liver_CD_Vehicle_Liver	TG(62:12/FA22:6)	Triacylglycerides	3.92979	0.00195286	0.0152884
HFD-DEN-Liver_CD_Vehicle_Liver	TG(62:10/FA18:2)	Triacylglycerides	2.62974	0.00171293	0.0152884
HFD-DEN-Liver_CD_Vehicle_Liver	TG(62:10/FA20:4)	Triacylglycerides	3.22628	0.00187864	0.0152884
HFD-DEN-Liver_CD_Vehicle_Liver	PC(18:3/20:4)	Phosphatidylcholine	-1.00076	0.00170257	0.0152884
HFD-DEN-Liver_CD_Vehicle_Liver	PC(P-18:0/18:3)	1-alkenyl,Phosphatidylcholine	-0.77926	0.00177826	0.0152884
HFD-DEN-Liver_CD_Vehicle_Liver	PE(14:1/22:0)	Phosphatidylethanolamine	-0.568896	0.00184868	0.0152884
HFD-DEN-Liver_CD_Vehicle_Liver	PE(18:2/18:2)	Phosphatidylethanolamine	-1.44235	0.00175267	0.0152884
HFD-DEN-Liver_CD_Vehicle_Liver	PE(18:2/22:4)	Phosphatidylethanolamine	-0.534544	0.00202122	0.0152884
HFD-DEN-Liver_CD_Vehicle_Liver	PG(16:1/18:2)	Phosphatidylglycerol	-1.42195	0.00189036	0.0152884
HFD-DEN-Liver_CD_Vehicle_Liver	PE(18:0/22:4)	Phosphatidylethanolamine	0.62201	0.00204551	0.0153827
HFD-DEN-Liver_CD_Vehicle_Liver	TG(50:3/FA16:0)	Triacylglycerides	2.26333	0.00212435	0.0154776
HFD-DEN-Liver_CD_Vehicle_Liver	TG(52:1/FA18:0)	Triacylglycerides	4.17491	0.00208424	0.0154776
HFD-DEN-Liver_CD_Vehicle_Liver	TG(54:5/FA18:0)	Triacylglycerides	2.78242	0.00214533	0.0154776
HFD-DEN-Liver_CD_Vehicle_Liver	TG(56:9/FA22:6)	Triacylglycerides	2.75248	0.00210451	0.0154776
HFD-DEN-Liver_CD_Vehicle_Liver	TG(58:6/FA20:2)	Triacylglycerides	3.46711	0.00215038	0.0154776
HFD-DEN-Liver_CD_Vehicle_Liver	TG(56:6/FA20:3)	Triacylglycerides	2.93483	0.0021533	0.0154776
HFD-DEN-Liver_CD_Vehicle_Liver	TG(58:7/FA18:0)	Triacylglycerides	4.00775	0.00212917	0.0154776
HFD-DEN-Liver_CD_Vehicle_Liver	PS(20:2/22:6)	Phosphatidylserine	-1.48775	0.0021111	0.0154776
HFD-DEN-Liver_CD_Vehicle_Liver	TG(58:6/FA18:3)	Triacylglycerides	2.86762	0.00216823	0.0154992
HFD-DEN-Liver_CD_Vehicle_Liver	TG(58:9/FA20:2)	Triacylglycerides	3.31578	0.00218851	0.0155587
HFD-DEN-Liver_CD_Vehicle_Liver	TG(58:7/FA16:0)	Triacylglycerides	3.0409	0.00222554	0.015736
HFD-DEN-Liver_CD_Vehicle_Liver	TG(62:13/FA18:1)	Triacylglycerides	4.0973	0.0022607	0.0158128
HFD-DEN-Liver_CD_Vehicle_Liver	PE(16:1/22:6)	Phosphatidylethanolamine	-1.5138	0.00225357	0.0158128
HFD-DEN-Liver_CD_Vehicle_Liver	TG(52:5/FA16:1)	Triacylglycerides	2.03869	0.00229961	0.0158331
HFD-DEN-Liver_CD_Vehicle_Liver	TG(58:10/FA20:4)	Triacylglycerides	3.31827	0.00230062	0.0158331
HFD-DEN-Liver_CD_Vehicle_Liver	TG(58:9/FA22:4)	Triacylglycerides	1.49932	0.0023123	0.0158331
HFD-DEN-Liver_CD_Vehicle_Liver	PI(18:0/20:4)	Phosphatidylinositol	0.820928	0.00228753	0.0158331
HFD-DEN-Liver_CD_Vehicle_Liver	TG(52:4/FA20:3)	Triacylglycerides	2.78728	0.00237449	0.0158453
HFD-DEN-Liver_CD_Vehicle_Liver	TG(54:7/FA16:0)	Triacylglycerides	3.03343	0.00237395	0.0158453
HFD-DEN-Liver_CD_Vehicle_Liver	TG(58:8/FA20:2)	Triacylglycerides	3.36207	0.00233256	0.0158453
HFD-DEN-Liver_CD_Vehicle_Liver	TG(58:8/FA18:2)	Triacylglycerides	2.75298	0.00237496	0.0158453
HFD-DEN-Liver_CD_Vehicle_Liver	TG(58:9/FA18:1)	Triacylglycerides	3.13548	0.00234479	0.0158453
HFD-DEN-Liver_CD_Vehicle_Liver	TG(54:4/FA16:0)	Triacylglycerides	3.6863	0.00242766	0.0159694
HFD-DEN-Liver_CD_Vehicle_Liver	TG(54:3/FA16:0)	Triacylglycerides	3.60286	0.00243039	0.0159694
HFD-DEN-Liver_CD_Vehicle_Liver	TG(58:6/FA18:2)	Triacylglycerides	3.34084	0.00241598	0.0159694
HFD-DEN-Liver_CD_Vehicle_Liver	TG(54:8/FA16:1)	Triacylglycerides	2.6595	0.00250401	0.0162886
HFD-DEN-Liver_CD_Vehicle_Liver	PI(18:0/20:3)	Phosphatidylinositol	1.06179	0.00249832	0.0162886
HFD-DEN-Liver_CD_Vehicle_Liver	SM(d18:1/24:0)	Sphingomyelins	-0.360098	0.00252404	0.0163372
HFD-DEN-Liver_CD_Vehicle_Liver	TG(52:5/FA20:5)	Triacylglycerides	3.26822	0.00254595	0.0163974
HFD-DEN-Liver_CD_Vehicle_Liver	PC(18:3/18:3)	Phosphatidylcholine	-2.47209	0.0025749	0.0164885
HFD-DEN-Liver_CD_Vehicle_Liver	PE(O-18:0/18:3)	1-alkyl,Phosphoethanolamine	-1.7285	0.00258544	0.0164885
HFD-DEN-Liver_CD_Vehicle_Liver	TG(50:2/FA16:0)	Triacylglycerides	2.97719	0.00261761	0.0165374
HFD-DEN-Liver_CD_Vehicle_Liver	TG(52:2/FA16:0)	Triacylglycerides	3.90656	0.00271134	0.0165374
HFD-DEN-Liver_CD_Vehicle_Liver	TG(54:6/FA20:5)	Triacylglycerides	3.63065	0.00272021	0.0165374
HFD-DEN-Liver_CD_Vehicle_Liver	TG(52:5/FA18:2)	Triacylglycerides	1.7385	0.00267833	0.0165374
HFD-DEN-Liver_CD_Vehicle_Liver	TG(54:6/FA20:4)	Triacylglycerides	3.23822	0.00263757	0.0165374
HFD-DEN-Liver_CD_Vehicle_Liver	TG(56:6/FA22:4)	Triacylglycerides	3.51213	0.00271592	0.0165374
HFD-DEN-Liver_CD_Vehicle_Liver	TG(58:8/FA16:0)	Triacylglycerides	2.70359	0.00270771	0.0165374
HFD-DEN-Liver_CD_Vehicle_Liver	TG(58:9/FA20:5)	Triacylglycerides	2.89321	0.00265835	0.0165374
HFD-DEN-Liver_CD_Vehicle_Liver	TG(52:5/FA18:1)	Triacylglycerides	2.08124	0.00266951	0.0165374
HFD-DEN-Liver_CD_Vehicle_Liver	PG(16:0/18:2)	Phosphatidylglycerol	-1.21777	0.00268692	0.0165374
HFD-DEN-Liver_CD_Vehicle_Liver	TG(56:3/FA16:0)	Triacylglycerides	3.71136	0.00277402	0.0166967
HFD-DEN-Liver_CD_Vehicle_Liver	TG(56:7/FA22:6)	Triacylglycerides	4.19923	0.00278492	0.0166967
HFD-DEN-Liver_CD_Vehicle_Liver	TG(54:3/FA18:2)	Triacylglycerides	3.59873	0.00278437	0.0166967
HFD-DEN-Liver_CD_Vehicle_Liver	TG(48:0/FA16:0)	Triacylglycerides	2.79613	0.0028263	0.0167137
HFD-DEN-Liver_CD_Vehicle_Liver	TG(60:9/FA18:2)	Triacylglycerides	2.63842	0.00280807	0.0167137
HFD-DEN-Liver_CD_Vehicle_Liver	PC(16:1/22:6)	Phosphatidylcholine	-0.636158	0.00282421	0.0167137
HFD-DEN-Liver_CD_Vehicle_Liver	TG(52:4/FA18:3)	Triacylglycerides	2.56796	0.0028484	0.0167682
HFD-DEN-Liver_CD_Vehicle_Liver	TG(60:10/FA20:2)	Triacylglycerides	2.87505	0.00286445	0.0167867
HFD-DEN-Liver_CD_Vehicle_Liver	TG(54:5/FA22:4)	Triacylglycerides	3.04137	0.00293019	0.0170039
HFD-DEN-Liver_CD_Vehicle_Liver	TG(56:6/FA18:2)	Triacylglycerides	2.95491	0.00295412	0.0170039
HFD-DEN-Liver_CD_Vehicle_Liver	TG(58:8/FA22:6)	Triacylglycerides	3.98962	0.00296687	0.0170039
HFD-DEN-Liver_CD_Vehicle_Liver	TG(52:5/FA20:3)	Triacylglycerides	2.38088	0.00295856	0.0170039
HFD-DEN-Liver_CD_Vehicle_Liver	PE(14:0/20:4)	Phosphatidylethanolamine	-0.902532	0.00293776	0.0170039
HFD-DEN-Liver_CD_Vehicle_Liver	TG(58:6/FA18:0)	Triacylglycerides	4.05451	0.00298664	0.0170422
HFD-DEN-Liver_CD_Vehicle_Liver	TG(60:9/FA20:3)	Triacylglycerides	4.36261	0.00301563	0.0171325
HFD-DEN-Liver_CD_Vehicle_Liver	TG(58:8/FA18:0)	Triacylglycerides	4.04839	0.00302898	0.0171335
HFD-DEN-Liver_CD_Vehicle_Liver	SM(d18:1/14:0)	Sphingomyelins	-0.437144	0.00307387	0.0171635
HFD-DEN-Liver_CD_Vehicle_Liver	TG(54:7/FA18:1)	Triacylglycerides	2.07463	0.00307327	0.0171635
HFD-DEN-Liver_CD_Vehicle_Liver	TG(58:9/FA18:2)	Triacylglycerides	2.8758	0.0030714	0.0171635
HFD-DEN-Liver_CD_Vehicle_Liver	TG(52:3/FA16:0)	Triacylglycerides	3.1466	0.00309134	0.0171873
HFD-DEN-Liver_CD_Vehicle_Liver	TG(52:2/FA16:1)	Triacylglycerides	3.84027	0.00313062	0.0172582
HFD-DEN-Liver_CD_Vehicle_Liver	TG(58:7/FA20:4)	Triacylglycerides	3.389	0.00311872	0.0172582
HFD-DEN-Liver_CD_Vehicle_Liver	TG(60:8/FA20:3)	Triacylglycerides	4.18334	0.0031769	0.0173087
HFD-DEN-Liver_CD_Vehicle_Liver	TG(60:10/FA20:3)	Triacylglycerides	4.25644	0.00318937	0.0173087
HFD-DEN-Liver_CD_Vehicle_Liver	TG(60:11/FA20:4)	Triacylglycerides	3.59301	0.003191	0.0173087
HFD-DEN-Liver_CD_Vehicle_Liver	PE(16:1/20:4)	Phosphatidylethanolamine	-1.19558	0.00319299	0.0173087
HFD-DEN-Liver_CD_Vehicle_Liver	TG(54:8/FA22:6)	Triacylglycerides	2.58353	0.00321303	0.017345
HFD-DEN-Liver_CD_Vehicle_Liver	TG(54:3/FA18:0)	Triacylglycerides	3.75775	0.00327938	0.0174942
HFD-DEN-Liver_CD_Vehicle_Liver	TG(56:10/FA16:0)	Triacylglycerides	3.24024	0.00328019	0.0174942
HFD-DEN-Liver_CD_Vehicle_Liver	PE(16:1/18:2)	Phosphatidylethanolamine	-1.69619	0.00328101	0.0174942
HFD-DEN-Liver_CD_Vehicle_Liver	TG(58:9/FA20:3)	Triacylglycerides	3.58543	0.00331573	0.0176072
HFD-DEN-Liver_CD_Vehicle_Liver	TG(50:1/FA18:1)	Triacylglycerides	3.46113	0.00339448	0.0177476
HFD-DEN-Liver_CD_Vehicle_Liver	TG(56:2/FA16:0)	Triacylglycerides	4.33162	0.0033994	0.0177476
HFD-DEN-Liver_CD_Vehicle_Liver	TG(54:5/FA18:1)	Triacylglycerides	2.41701	0.00341038	0.0177476
HFD-DEN-Liver_CD_Vehicle_Liver	TG(56:8/FA18:1)	Triacylglycerides	3.43984	0.00340753	0.0177476
HFD-DEN-Liver_CD_Vehicle_Liver	PE(14:0/20:1)	Phosphatidylethanolamine	-0.696926	0.00339863	0.0177476
HFD-DEN-Liver_CD_Vehicle_Liver	TG(58:9/FA16:0)	Triacylglycerides	3.71442	0.00350388	0.0181615
HFD-DEN-Liver_CD_Vehicle_Liver	PE(18:3/18:3)	Phosphatidylethanolamine	-4.03311	0.00357579	0.0184607
HFD-DEN-Liver_CD_Vehicle_Liver	PC(16:1/18:3)	Phosphatidylcholine	-1.66416	0.00361892	0.0186095
HFD-DEN-Liver_CD_Vehicle_Liver	TG(56:7/FA20:5)	Triacylglycerides	3.34353	0.00370585	0.0189815
HFD-DEN-Liver_CD_Vehicle_Liver	TG(56:11/FA16:1)	Triacylglycerides	3.30282	0.00375241	0.0190699
HFD-DEN-Liver_CD_Vehicle_Liver	PC(18:0/22:2)	Phosphatidylcholine	0.98494	0.0037384	0.0190699
HFD-DEN-Liver_CD_Vehicle_Liver	TG(58:6/FA22:4)	Triacylglycerides	4.04738	0.00381294	0.0190793
HFD-DEN-Liver_CD_Vehicle_Liver	TG(58:10/FA16:0)	Triacylglycerides	3.70878	0.00381076	0.0190793
HFD-DEN-Liver_CD_Vehicle_Liver	PE(18:1/20:5)	Phosphatidylethanolamine	-0.690168	0.00379633	0.0190793
HFD-DEN-Liver_CD_Vehicle_Liver	PE(O-16:0/18:3)	1-alkyl,Phosphoethanolamine	-2.20351	0.00380758	0.0190793
HFD-DEN-Liver_CD_Vehicle_Liver	Cer(d18:1/20:4)	Ceramides	2.15392	0.00383609	0.0191216
HFD-DEN-Liver_CD_Vehicle_Liver	TG(54:2/FA16:0)	Triacylglycerides	4.28317	0.00386307	0.0191677
HFD-DEN-Liver_CD_Vehicle_Liver	TG(52:5/FA18:3)	Triacylglycerides	1.91341	0.00392765	0.0191677
HFD-DEN-Liver_CD_Vehicle_Liver	TG(58:9/FA20:4)	Triacylglycerides	2.85458	0.00396318	0.0191677
HFD-DEN-Liver_CD_Vehicle_Liver	TG(60:9/FA22:4)	Triacylglycerides	3.93651	0.00394549	0.0191677
HFD-DEN-Liver_CD_Vehicle_Liver	TG(60:11/FA22:6)	Triacylglycerides	3.87709	0.00391788	0.0191677
HFD-DEN-Liver_CD_Vehicle_Liver	TG(58:7/FA18:2)	Triacylglycerides	2.981	0.00395322	0.0191677
HFD-DEN-Liver_CD_Vehicle_Liver	TG(60:10/FA18:1)	Triacylglycerides	3.81186	0.00393712	0.0191677
HFD-DEN-Liver_CD_Vehicle_Liver	PC(14:1/18:2)	Phosphatidylcholine	-0.94836	0.00390494	0.0191677
HFD-DEN-Liver_CD_Vehicle_Liver	TG(52:4/FA18:2)	Triacylglycerides	2.45017	0.00402076	0.0193026
HFD-DEN-Liver_CD_Vehicle_Liver	TG(60:7/FA18:0)	Triacylglycerides	3.4335	0.00401347	0.0193026
HFD-DEN-Liver_CD_Vehicle_Liver	TG(58:7/FA22:6)	Triacylglycerides	5.25742	0.00405249	0.0193834
HFD-DEN-Liver_CD_Vehicle_Liver	TG(60:8/FA16:0)	Triacylglycerides	3.32912	0.00408813	0.0194822
HFD-DEN-Liver_CD_Vehicle_Liver	TG(56:8/FA20:5)	Triacylglycerides	2.42401	0.00411925	0.0195589
HFD-DEN-Liver_CD_Vehicle_Liver	TG(60:13/FA22:6)	Triacylglycerides	3.41655	0.0041803	0.0196522
HFD-DEN-Liver_CD_Vehicle_Liver	TG(60:7/FA20:4)	Triacylglycerides	3.42194	0.00418217	0.0196522
HFD-DEN-Liver_CD_Vehicle_Liver	TG(58:12/FA20:4)	Triacylglycerides	3.63961	0.0041842	0.0196522
HFD-DEN-Liver_CD_Vehicle_Liver	TG(50:3/FA18:3)	Triacylglycerides	2.24019	0.00432018	0.0197212
HFD-DEN-Liver_CD_Vehicle_Liver	TG(56:2/FA18:0)	Triacylglycerides	4.76058	0.00425343	0.0197212
HFD-DEN-Liver_CD_Vehicle_Liver	TG(56:4/FA18:0)	Triacylglycerides	3.96756	0.00431101	0.0197212
HFD-DEN-Liver_CD_Vehicle_Liver	TG(52:3/FA18:1)	Triacylglycerides	3.27306	0.00423535	0.0197212
HFD-DEN-Liver_CD_Vehicle_Liver	TG(58:6/FA16:0)	Triacylglycerides	3.21486	0.00430576	0.0197212
HFD-DEN-Liver_CD_Vehicle_Liver	TG(60:10/FA18:2)	Triacylglycerides	2.30627	0.00426721	0.0197212
HFD-DEN-Liver_CD_Vehicle_Liver	PC(18:0/18:3)	Phosphatidylcholine	0.297835	0.00428765	0.0197212
HFD-DEN-Liver_CD_Vehicle_Liver	PE(22:4/22:6)	Phosphatidylethanolamine	-0.988453	0.00424371	0.0197212
HFD-DEN-Liver_CD_Vehicle_Liver	TG(60:8/FA18:2)	Triacylglycerides	2.32377	0.00435051	0.0197902
HFD-DEN-Liver_CD_Vehicle_Liver	SM(d18:1/26:0)	Sphingomyelins	-0.894168	0.00438543	0.0198597
HFD-DEN-Liver_CD_Vehicle_Liver	TG(64:12/FA22:6)	Triacylglycerides	3.55475	0.0043963	0.0198597
HFD-DEN-Liver_CD_Vehicle_Liver	PC(18:1/18:2)	Phosphatidylcholine	-0.530577	0.00441295	0.0198659
HFD-DEN-Liver_CD_Vehicle_Liver	PC(14:1/20:4)	Phosphatidylcholine	-0.570002	0.00450283	0.0200935
HFD-DEN-Liver_CD_Vehicle_Liver	PE(14:0/20:2)	Phosphatidylethanolamine	-1.33948	0.00448349	0.0200935
HFD-DEN-Liver_CD_Vehicle_Liver	PG(14:0/18:2)	Phosphatidylglycerol	-1.81353	0.00450984	0.0200935
HFD-DEN-Liver_CD_Vehicle_Liver	TG(60:6/FA22:2)	Triacylglycerides	3.12138	0.0045727	0.0203041
HFD-DEN-Liver_CD_Vehicle_Liver	TG(56:7/FA18:2)	Triacylglycerides	2.77695	0.00458841	0.0203045
HFD-DEN-Liver_CD_Vehicle_Liver	TG(54:5/FA16:1)	Triacylglycerides	3.34424	0.00472123	0.0205512
HFD-DEN-Liver_CD_Vehicle_Liver	TG(54:4/FA20:2)	Triacylglycerides	3.22948	0.00472315	0.0205512
HFD-DEN-Liver_CD_Vehicle_Liver	TG(56:9/FA16:0)	Triacylglycerides	2.94444	0.0047167	0.0205512
HFD-DEN-Liver_CD_Vehicle_Liver	TG(58:7/FA18:1)	Triacylglycerides	3.74355	0.00470715	0.0205512
HFD-DEN-Liver_CD_Vehicle_Liver	TG(60:12/FA18:1)	Triacylglycerides	3.48845	0.00470763	0.0205512
HFD-DEN-Liver_CD_Vehicle_Liver	TG(56:8/FA18:3)	Triacylglycerides	2.43678	0.0047614	0.0205811
HFD-DEN-Liver_CD_Vehicle_Liver	TG(58:9/FA22:6)	Triacylglycerides	2.94566	0.00476693	0.0205811
HFD-DEN-Liver_CD_Vehicle_Liver	PS(18:1/22:6)	Phosphatidylserine	-1.31882	0.00477746	0.0205811
HFD-DEN-Liver_CD_Vehicle_Liver	PE(20:4/22:4)	Phosphatidylethanolamine	-0.671414	0.00480648	0.0206377
HFD-DEN-Liver_CD_Vehicle_Liver	TG(50:1/FA18:0)	Triacylglycerides	3.40638	0.0048496	0.0207544
HFD-DEN-Liver_CD_Vehicle_Liver	TG(58:11/FA20:4)	Triacylglycerides	2.60661	0.0048721	0.0207823
HFD-DEN-Liver_CD_Vehicle_Liver	TG(54:6/FA16:1)	Triacylglycerides	3.20502	0.00490672	0.0208616
HFD-DEN-Liver_CD_Vehicle_Liver	TG(58:11/FA18:2)	Triacylglycerides	2.22931	0.0049448	0.020955
HFD-DEN-Liver_CD_Vehicle_Liver	TG(50:3/FA18:2)	Triacylglycerides	2.12747	0.00498384	0.0210443
HFD-DEN-Liver_CD_Vehicle_Liver	PC(14:0/18:0)	Phosphatidylcholine	0.496982	0.00499823	0.0210443
HFD-DEN-Liver_CD_Vehicle_Liver	TG(56:9/FA16:1)	Triacylglycerides	2.79412	0.00507948	0.0210459
HFD-DEN-Liver_CD_Vehicle_Liver	TG(60:11/FA16:1)	Triacylglycerides	3.99119	0.00506129	0.0210459
HFD-DEN-Liver_CD_Vehicle_Liver	TG(62:13/FA22:6)	Triacylglycerides	3.92088	0.00506555	0.0210459
HFD-DEN-Liver_CD_Vehicle_Liver	PC(18:0/20:4)	Phosphatidylcholine	0.747293	0.0050259	0.0210459
HFD-DEN-Liver_CD_Vehicle_Liver	PC(O-16:0/18:0)	1-alkyl,Phosphatidylcholine	0.794653	0.00506506	0.0210459
HFD-DEN-Liver_CD_Vehicle_Liver	TG(62:14/FA22:5)	Triacylglycerides	2.59342	0.00509831	0.0210568
HFD-DEN-Liver_CD_Vehicle_Liver	TG(54:6/FA20:2)	Triacylglycerides	2.48554	0.00516374	0.0212464
HFD-DEN-Liver_CD_Vehicle_Liver	TG(56:10/FA16:1)	Triacylglycerides	3.35393	0.00519319	0.0212464
HFD-DEN-Liver_CD_Vehicle_Liver	PC(14:0/16:0)	Phosphatidylcholine	-0.371582	0.00519042	0.0212464
HFD-DEN-Liver_CD_Vehicle_Liver	TG(54:5/FA18:2)	Triacylglycerides	2.04296	0.00522558	0.0212943
HFD-DEN-Liver_CD_Vehicle_Liver	TG(56:9/FA18:2)	Triacylglycerides	2.45794	0.00523765	0.0212943
HFD-DEN-Liver_CD_Vehicle_Liver	PC(16:1/20:2)	Phosphatidylcholine	-1.25935	0.00527223	0.0213681
HFD-DEN-Liver_CD_Vehicle_Liver	TG(62:10/FA22:4)	Triacylglycerides	3.67049	0.00534474	0.0215948
HFD-DEN-Liver_CD_Vehicle_Liver	TG(50:1/FA16:0)	Triacylglycerides	3.57209	0.00539235	0.021676
HFD-DEN-Liver_CD_Vehicle_Liver	TG(58:4/FA22:2)	Triacylglycerides	4.17562	0.00548056	0.021676
HFD-DEN-Liver_CD_Vehicle_Liver	TG(58:12/FA22:6)	Triacylglycerides	2.47204	0.00548148	0.021676
HFD-DEN-Liver_CD_Vehicle_Liver	TG(60:12/FA20:5)	Triacylglycerides	3.26424	0.00542397	0.021676
HFD-DEN-Liver_CD_Vehicle_Liver	PC(16:0/20:4)	Phosphatidylcholine	0.469119	0.00546663	0.021676
HFD-DEN-Liver_CD_Vehicle_Liver	PC(16:1/20:5)	Phosphatidylcholine	-1.13629	0.00540096	0.021676
HFD-DEN-Liver_CD_Vehicle_Liver	PE(P-18:0/22:6)	1-alkenyl,Phosphoethanolamine	0.494107	0.0054638	0.021676
HFD-DEN-Liver_CD_Vehicle_Liver	LacCer(d18:1/16:0)	Lactosylceramides	0.782793	0.0055617	0.0218693
HFD-DEN-Liver_CD_Vehicle_Liver	TG(56:8/FA16:0)	Triacylglycerides	3.39762	0.00558336	0.0218693
HFD-DEN-Liver_CD_Vehicle_Liver	TG(56:6/FA20:2)	Triacylglycerides	2.21108	0.00561416	0.0218693
HFD-DEN-Liver_CD_Vehicle_Liver	TG(54:7/FA20:3)	Triacylglycerides	2.02719	0.005585	0.0218693
HFD-DEN-Liver_CD_Vehicle_Liver	LPC(18:0)	Lysophosphatidylcholine	0.942983	0.00561442	0.0218693
HFD-DEN-Liver_CD_Vehicle_Liver	HexCer(d18:1/16:2)	Hexosylceramides	0.759684	0.0056487	0.0219372
HFD-DEN-Liver_CD_Vehicle_Liver	TG(58:6/FA18:1)	Triacylglycerides	3.82755	0.00567145	0.0219599
HFD-DEN-Liver_CD_Vehicle_Liver	PE(18:2/20:3)	Phosphatidylethanolamine	-0.494247	0.0056883	0.0219599
HFD-DEN-Liver_CD_Vehicle_Liver	PC(14:0/16:1)	Phosphatidylcholine	-0.863193	0.00570899	0.0219745
HFD-DEN-Liver_CD_Vehicle_Liver	PE(18:2/18:3)	Phosphatidylethanolamine	-1.05582	0.00576016	0.0221061
HFD-DEN-Liver_CD_Vehicle_Liver	PE(O-18:0/20:3)	1-alkyl,Phosphoethanolamine	0.490808	0.00577901	0.0221132
HFD-DEN-Liver_CD_Vehicle_Liver	TG(60:7/FA22:5)	Triacylglycerides	4.50654	0.00584104	0.0222259
HFD-DEN-Liver_CD_Vehicle_Liver	PE(18:2/20:1)	Phosphatidylethanolamine	-0.563632	0.00584263	0.0222259
HFD-DEN-Liver_CD_Vehicle_Liver	TG(58:9/FA22:5)	Triacylglycerides	2.35249	0.00586166	0.0222333
HFD-DEN-Liver_CD_Vehicle_Liver	PC(18:2/18:2)	Phosphatidylcholine	-0.972148	0.00588119	0.0222425
HFD-DEN-Liver_CD_Vehicle_Liver	Cer(d18:0/22:6)	Ceramides	1.59663	0.00594819	0.0223659
HFD-DEN-Liver_CD_Vehicle_Liver	TG(56:7/FA20:3)	Triacylglycerides	2.19367	0.00594424	0.0223659
HFD-DEN-Liver_CD_Vehicle_Liver	TG(56:4/FA16:0)	Triacylglycerides	4.17985	0.00600044	0.0224327
HFD-DEN-Liver_CD_Vehicle_Liver	LPC(20:4)	Lysophosphatidylcholine	0.287225	0.00599348	0.0224327
HFD-DEN-Liver_CD_Vehicle_Liver	Cer(d18:1/20:0)	Ceramides	1.85216	0.00603577	0.0224552
HFD-DEN-Liver_CD_Vehicle_Liver	PE(18:0/20:1)	Phosphatidylethanolamine	0.614742	0.00604098	0.0224552
HFD-DEN-Liver_CD_Vehicle_Liver	TG(58:6/FA20:4)	Triacylglycerides	4.09089	0.00608379	0.0224858
HFD-DEN-Liver_CD_Vehicle_Liver	TG(58:5/FA18:0)	Triacylglycerides	4.61428	0.00608148	0.0224858
HFD-DEN-Liver_CD_Vehicle_Liver	TG(58:7/FA20:3)	Triacylglycerides	3.68175	0.00612273	0.022544
HFD-DEN-Liver_CD_Vehicle_Liver	PE(16:1/22:2)	Phosphatidylethanolamine	-1.25291	0.00613419	0.022544
HFD-DEN-Liver_CD_Vehicle_Liver	TG(56:7/FA20:4)	Triacylglycerides	2.74561	0.00618533	0.0225647
HFD-DEN-Liver_CD_Vehicle_Liver	TG(64:13/FA22:5)	Triacylglycerides	3.47909	0.0061901	0.0225647
HFD-DEN-Liver_CD_Vehicle_Liver	PC(P-16:0/20:4)	1-alkenyl,Phosphatidylcholine	0.313549	0.00619184	0.0225647
HFD-DEN-Liver_CD_Vehicle_Liver	TG(54:6/FA18:1)	Triacylglycerides	2.03914	0.00624276	0.0226867
HFD-DEN-Liver_CD_Vehicle_Liver	TG(52:4/FA16:0)	Triacylglycerides	2.29703	0.00636356	0.0228071
HFD-DEN-Liver_CD_Vehicle_Liver	TG(54:2/FA22:2)	Triacylglycerides	3.07905	0.00630042	0.0228071
HFD-DEN-Liver_CD_Vehicle_Liver	TG(56:7/FA20:2)	Triacylglycerides	2.05176	0.00632058	0.0228071
HFD-DEN-Liver_CD_Vehicle_Liver	TG(56:8/FA20:4)	Triacylglycerides	1.78514	0.00634709	0.0228071
HFD-DEN-Liver_CD_Vehicle_Liver	PG(16:0/20:1)	Phosphatidylglycerol	1.07933	0.00633818	0.0228071
HFD-DEN-Liver_CD_Vehicle_Liver	TG(56:8/FA18:2)	Triacylglycerides	2.98266	0.00647774	0.0231526
HFD-DEN-Liver_CD_Vehicle_Liver	TG(56:5/FA18:1)	Triacylglycerides	3.94269	0.00651108	0.0231784
HFD-DEN-Liver_CD_Vehicle_Liver	TG(54:6/FA18:0)	Triacylglycerides	2.70374	0.0065206	0.0231784
HFD-DEN-Liver_CD_Vehicle_Liver	TG(58:7/FA20:5)	Triacylglycerides	3.55939	0.00658316	0.023337
HFD-DEN-Liver_CD_Vehicle_Liver	TG(58:7/FA22:5)	Triacylglycerides	4.07231	0.0066026	0.0233423
HFD-DEN-Liver_CD_Vehicle_Liver	TG(62:10/FA22:5)	Triacylglycerides	3.79805	0.00671903	0.023571
HFD-DEN-Liver_CD_Vehicle_Liver	PE(18:2/20:5)	Phosphatidylethanolamine	-1.09943	0.00669253	0.023571
HFD-DEN-Liver_CD_Vehicle_Liver	PI(16:0/18:1)	Phosphatidylinositol	0.822286	0.00672163	0.023571
HFD-DEN-Liver_CD_Vehicle_Liver	PC(16:1/22:2)	Phosphatidylcholine	0.742868	0.0067764	0.0236992
HFD-DEN-Liver_CD_Vehicle_Liver	PS(16:0/22:6)	Phosphatidylserine	-0.792892	0.00682337	0.0237995
HFD-DEN-Liver_CD_Vehicle_Liver	TG(56:6/FA20:4)	Triacylglycerides	3.81907	0.0068876	0.0239566
HFD-DEN-Liver_CD_Vehicle_Liver	TG(58:8/FA16:1)	Triacylglycerides	2.92665	0.00692365	0.0239566
HFD-DEN-Liver_CD_Vehicle_Liver	PE(P-18:0/18:3)	1-alkenyl,Phosphoethanolamine	-1.40013	0.00690589	0.0239566
HFD-DEN-Liver_CD_Vehicle_Liver	TG(56:6/FA18:3)	Triacylglycerides	2.38191	0.00699406	0.024136
HFD-DEN-Liver_CD_Vehicle_Liver	TG(62:9/FA18:2)	Triacylglycerides	2.28694	0.00701701	0.0241511
HFD-DEN-Liver_CD_Vehicle_Liver	TG(54:4/FA16:1)	Triacylglycerides	3.36034	0.00709373	0.0243508
HFD-DEN-Liver_CD_Vehicle_Liver	TG(52:2/FA18:1)	Triacylglycerides	3.78984	0.00715154	0.0244713
HFD-DEN-Liver_CD_Vehicle_Liver	TG(56:5/FA18:3)	Triacylglycerides	2.59102	0.00716645	0.0244713
HFD-DEN-Liver_CD_Vehicle_Liver	TG(54:2/FA18:1)	Triacylglycerides	4.54628	0.00719684	0.0245107
HFD-DEN-Liver_CD_Vehicle_Liver	Cer(d18:0/20:0)	Ceramides	1.61005	0.00723682	0.0245825
HFD-DEN-Liver_CD_Vehicle_Liver	TG(54:7/FA20:5)	Triacylglycerides	2.66598	0.00728879	0.0246946
HFD-DEN-Liver_CD_Vehicle_Liver	TG(54:8/FA16:0)	Triacylglycerides	3.03702	0.00742776	0.0249563
HFD-DEN-Liver_CD_Vehicle_Liver	TG(60:8/FA22:6)	Triacylglycerides	4.82623	0.00741366	0.0249563
HFD-DEN-Liver_CD_Vehicle_Liver	TG(64:11/FA22:5)	Triacylglycerides	3.65297	0.00743734	0.0249563
HFD-DEN-Liver_CD_Vehicle_Liver	PG(14:0/18:1)	Phosphatidylglycerol	-1.55824	0.00744277	0.0249563
HFD-DEN-Liver_CD_Vehicle_Liver	TG(60:12/FA20:4)	Triacylglycerides	2.57719	0.00751558	0.0251356
HFD-DEN-Liver_CD_Vehicle_Liver	TG(52:6/FA20:4)	Triacylglycerides	2.02114	0.00768533	0.0256375
HFD-DEN-Liver_CD_Vehicle_Liver	TG(54:7/FA20:4)	Triacylglycerides	2.4427	0.00770992	0.0256537
HFD-DEN-Liver_CD_Vehicle_Liver	TG(58:8/FA22:2)	Triacylglycerides	2.40883	0.00777982	0.0257546
HFD-DEN-Liver_CD_Vehicle_Liver	TG(58:11/FA22:5)	Triacylglycerides	1.84585	0.00776897	0.0257546
HFD-DEN-Liver_CD_Vehicle_Liver	TG(60:11/FA20:3)	Triacylglycerides	2.93251	0.00795135	0.0262556
HFD-DEN-Liver_CD_Vehicle_Liver	TG(58:10/FA18:3)	Triacylglycerides	2.23836	0.00801724	0.0263395
HFD-DEN-Liver_CD_Vehicle_Liver	PE(18:2/22:6)	Phosphatidylethanolamine	-0.847702	0.00800389	0.0263395
HFD-DEN-Liver_CD_Vehicle_Liver	TG(58:10/FA22:5)	Triacylglycerides	2.06297	0.00804066	0.0263499
HFD-DEN-Liver_CD_Vehicle_Liver	TG(62:11/FA18:1)	Triacylglycerides	3.60811	0.00814951	0.0266395
HFD-DEN-Liver_CD_Vehicle_Liver	SM(d18:1/20:0)	Sphingomyelins	0.903429	0.00818524	0.02668
HFD-DEN-Liver_CD_Vehicle_Liver	TG(58:11/FA20:5)	Triacylglycerides	3.15602	0.00820967	0.02668
HFD-DEN-Liver_CD_Vehicle_Liver	PE(P-18:0/22:4)	1-alkenyl,Phosphoethanolamine	0.747188	0.00822341	0.02668
HFD-DEN-Liver_CD_Vehicle_Liver	TG(62:15/FA22:6)	Triacylglycerides	2.73979	0.00826332	0.0267075
HFD-DEN-Liver_CD_Vehicle_Liver	PG(18:2/22:1)	Phosphatidylglycerol	-0.979519	0.00827297	0.0267075
HFD-DEN-Liver_CD_Vehicle_Liver	TG(50:4/FA16:0)	Triacylglycerides	1.85326	0.00832808	0.0268189
HFD-DEN-Liver_CD_Vehicle_Liver	LPE(18:3)	Lysophosphatidylethanolamine	-1.17636	0.00836944	0.0268856
HFD-DEN-Liver_CD_Vehicle_Liver	TG(56:9/FA18:3)	Triacylglycerides	2.3643	0.00845664	0.0270821
HFD-DEN-Liver_CD_Vehicle_Liver	TG(62:8/FA22:4)	Triacylglycerides	3.43765	0.00848188	0.0270821
HFD-DEN-Liver_CD_Vehicle_Liver	TG(60:11/FA18:1)	Triacylglycerides	3.56088	0.00853058	0.0270821
HFD-DEN-Liver_CD_Vehicle_Liver	PC(O-18:0/20:4)	1-alkyl,Phosphatidylcholine	0.552923	0.00850112	0.0270821
HFD-DEN-Liver_CD_Vehicle_Liver	PI(18:0/22:6)	Phosphatidylinositol	0.42322	0.00853473	0.0270821
HFD-DEN-Liver_CD_Vehicle_Liver	TG(48:1/FA16:0)	Triacylglycerides	2.33975	0.00862999	0.0271855
HFD-DEN-Liver_CD_Vehicle_Liver	TG(62:12/FA22:4)	Triacylglycerides	3.28109	0.00860964	0.0271855
HFD-DEN-Liver_CD_Vehicle_Liver	PG(14:0/20:2)	Phosphatidylglycerol	-1.10767	0.00861546	0.0271855
HFD-DEN-Liver_CD_Vehicle_Liver	TG(54:2/FA18:0)	Triacylglycerides	4.44277	0.0086556	0.0272003
HFD-DEN-Liver_CD_Vehicle_Liver	TG(60:8/FA22:5)	Triacylglycerides	3.88736	0.0087298	0.0273674
HFD-DEN-Liver_CD_Vehicle_Liver	TG(58:7/FA20:2)	Triacylglycerides	3.72192	0.00880678	0.0275423
HFD-DEN-Liver_CD_Vehicle_Liver	TG(58:3/FA22:2)	Triacylglycerides	4.1789	0.00899433	0.0280614
HFD-DEN-Liver_CD_Vehicle_Liver	TG(58:10/FA22:6)	Triacylglycerides	2.50149	0.00908486	0.0282086
HFD-DEN-Liver_CD_Vehicle_Liver	PG(18:1/18:2)	Phosphatidylglycerol	-1.63977	0.00906399	0.0282086
HFD-DEN-Liver_CD_Vehicle_Liver	PC(16:1/16:1)	Phosphatidylcholine	-1.20453	0.00910887	0.0282158
HFD-DEN-Liver_CD_Vehicle_Liver	PC(18:0/20:2)	Phosphatidylcholine	0.450561	0.00928085	0.0285755
HFD-DEN-Liver_CD_Vehicle_Liver	PC(18:2/22:5)	Phosphatidylcholine	-1.09491	0.00925553	0.0285755
HFD-DEN-Liver_CD_Vehicle_Liver	PI(16:1/20:4)	Phosphatidylinositol	-1.89948	0.00929089	0.0285755
HFD-DEN-Liver_CD_Vehicle_Liver	TG(56:10/FA18:2)	Triacylglycerides	2.98286	0.00939691	0.0288334
HFD-DEN-Liver_CD_Vehicle_Liver	TG(50:2/FA16:1)	Triacylglycerides	3.25115	0.00953146	0.0289119
HFD-DEN-Liver_CD_Vehicle_Liver	TG(58:11/FA16:1)	Triacylglycerides	3.23059	0.00949857	0.0289119
HFD-DEN-Liver_CD_Vehicle_Liver	TG(58:5/FA18:2)	Triacylglycerides	3.46202	0.00953358	0.0289119
HFD-DEN-Liver_CD_Vehicle_Liver	TG(62:8/FA18:1)	Triacylglycerides	3.3846	0.0095245	0.0289119
HFD-DEN-Liver_CD_Vehicle_Liver	PE(20:3/22:2)	Phosphatidylethanolamine	0.531251	0.00945064	0.0289119
HFD-DEN-Liver_CD_Vehicle_Liver	TG(52:4/FA20:2)	Triacylglycerides	2.45917	0.00955719	0.028916
HFD-DEN-Liver_CD_Vehicle_Liver	TG(58:10/FA18:2)	Triacylglycerides	2.10659	0.00976806	0.0294217
HFD-DEN-Liver_CD_Vehicle_Liver	PS(18:3/20:4)	Phosphatidylserine	-0.926028	0.00976954	0.0294217
HFD-DEN-Liver_CD_Vehicle_Liver	TG(54:5/FA18:3)	Triacylglycerides	2.22371	0.00980513	0.0294607
HFD-DEN-Liver_CD_Vehicle_Liver	Cer(d18:1/22:0)	Ceramides	0.88372	0.00984924	0.029525
HFD-DEN-Liver_CD_Vehicle_Liver	PE(14:1/20:4)	Phosphatidylethanolamine	-1.43669	0.0100887	0.0301733
HFD-DEN-Liver_CD_Vehicle_Liver	TG(58:6/FA20:3)	Triacylglycerides	4.10114	0.0101326	0.0302351
HFD-DEN-Liver_CD_Vehicle_Liver	TG(56:8/FA20:2)	Triacylglycerides	1.74962	0.0101828	0.0303154
HFD-DEN-Liver_CD_Vehicle_Liver	TG(52:6/FA16:0)	Triacylglycerides	1.86129	0.0103624	0.0307795
HFD-DEN-Liver_CD_Vehicle_Liver	SM(d18:1/14:1)	Sphingomyelins	-0.83502	0.0103954	0.0308074
HFD-DEN-Liver_CD_Vehicle_Liver	PE(20:3/20:4)	Phosphatidylethanolamine	-0.526306	0.0104356	0.0308563
HFD-DEN-Liver_CD_Vehicle_Liver	TG(54:5/FA20:2)	Triacylglycerides	2.38479	0.0104662	0.0308764
HFD-DEN-Liver_CD_Vehicle_Liver	PE(18:1/20:2)	Phosphatidylethanolamine	-0.676151	0.0106146	0.0312433
HFD-DEN-Liver_CD_Vehicle_Liver	TG(52:6/FA16:1)	Triacylglycerides	1.39095	0.0106967	0.0314139
HFD-DEN-Liver_CD_Vehicle_Liver	TG(60:10/FA16:0)	Triacylglycerides	4.08385	0.010772	0.031564
HFD-DEN-Liver_CD_Vehicle_Liver	TG(48:1/FA16:1)	Triacylglycerides	2.31654	0.0108508	0.0316521
HFD-DEN-Liver_CD_Vehicle_Liver	TG(60:9/FA20:2)	Triacylglycerides	3.70813	0.0108407	0.0316521
HFD-DEN-Liver_CD_Vehicle_Liver	TG(54:6/FA18:3)	Triacylglycerides	1.41477	0.0111176	0.0323578
HFD-DEN-Liver_CD_Vehicle_Liver	TG(54:3/FA16:1)	Triacylglycerides	4.36609	0.0111498	0.0323793
HFD-DEN-Liver_CD_Vehicle_Liver	TG(50:4/FA18:3)	Triacylglycerides	1.53236	0.0112406	0.0325551
HFD-DEN-Liver_CD_Vehicle_Liver	PS(20:4/22:4)	Phosphatidylserine	-0.943508	0.0112604	0.0325551
HFD-DEN-Liver_CD_Vehicle_Liver	TG(54:3/FA20:2)	Triacylglycerides	3.71253	0.0113955	0.0325691
HFD-DEN-Liver_CD_Vehicle_Liver	TG(58:5/FA16:0)	Triacylglycerides	3.44607	0.0113607	0.0325691
HFD-DEN-Liver_CD_Vehicle_Liver	TG(58:8/FA22:4)	Triacylglycerides	2.35485	0.0114405	0.0325691
HFD-DEN-Liver_CD_Vehicle_Liver	TG(58:6/FA16:1)	Triacylglycerides	3.90141	0.011413	0.0325691
HFD-DEN-Liver_CD_Vehicle_Liver	TG(62:12/FA22:5)	Triacylglycerides	3.66772	0.011311	0.0325691
HFD-DEN-Liver_CD_Vehicle_Liver	PC(P-18:0/20:3)	1-alkenyl,Phosphatidylcholine	0.753586	0.011429	0.0325691
HFD-DEN-Liver_CD_Vehicle_Liver	PE(16:1/20:3)	Phosphatidylethanolamine	-0.823084	0.0113337	0.0325691
HFD-DEN-Liver_CD_Vehicle_Liver	PC(16:1/20:4)	Phosphatidylcholine	-0.291885	0.0115978	0.0328729
HFD-DEN-Liver_CD_Vehicle_Liver	PC(20:0/20:4)	Phosphatidylcholine	0.684961	0.0115882	0.0328729
HFD-DEN-Liver_CD_Vehicle_Liver	TG(62:7/FA22:5)	Triacylglycerides	5.01164	0.011737	0.0331954
HFD-DEN-Liver_CD_Vehicle_Liver	TG(52:4/FA16:1)	Triacylglycerides	2.90004	0.0117697	0.0332157
HFD-DEN-Liver_CD_Vehicle_Liver	TG(60:4/FA16:0)	Triacylglycerides	3.01916	0.011823	0.0332218
HFD-DEN-Liver_CD_Vehicle_Liver	TG(58:10/FA20:3)	Triacylglycerides	2.99229	0.011805	0.0332218
HFD-DEN-Liver_CD_Vehicle_Liver	Cer(d18:1/18:2)	Ceramides	0.981239	0.0118869	0.0333294
HFD-DEN-Liver_CD_Vehicle_Liver	PG(16:0/16:0)	Phosphatidylglycerol	-1.66077	0.0119901	0.0335464
HFD-DEN-Liver_CD_Vehicle_Liver	PC(14:0/20:0)	Phosphatidylcholine	0.49638	0.0122293	0.0341422
HFD-DEN-Liver_CD_Vehicle_Liver	TG(52:3/FA20:2)	Triacylglycerides	2.77072	0.0122774	0.0342033
HFD-DEN-Liver_CD_Vehicle_Liver	TG(52:4/FA18:1)	Triacylglycerides	2.72019	0.0123858	0.0344139
HFD-DEN-Liver_CD_Vehicle_Liver	PG(16:0/18:3)	Phosphatidylglycerol	-2.10848	0.0124059	0.0344139
HFD-DEN-Liver_CD_Vehicle_Liver	PE(16:0/18:2)	Phosphatidylethanolamine	-0.746291	0.0124599	0.03449
HFD-DEN-Liver_CD_Vehicle_Liver	TG(58:10/FA18:1)	Triacylglycerides	3.2478	0.012493	0.0345082
HFD-DEN-Liver_CD_Vehicle_Liver	TG(58:4/FA18:2)	Triacylglycerides	4.12938	0.012541	0.0345675
HFD-DEN-Liver_CD_Vehicle_Liver	PC(18:3/22:6)	Phosphatidylcholine	-0.732555	0.0125718	0.034579
HFD-DEN-Liver_CD_Vehicle_Liver	TG(58:8/FA22:5)	Triacylglycerides	3.01912	0.0126208	0.0346406
HFD-DEN-Liver_CD_Vehicle_Liver	PC(P-18:0/18:2)	1-alkenyl,Phosphatidylcholine	-0.303477	0.0126499	0.0346474
HFD-DEN-Liver_CD_Vehicle_Liver	PE(20:3/22:6)	Phosphatidylethanolamine	-1.23457	0.0127725	0.0349098
HFD-DEN-Liver_CD_Vehicle_Liver	TG(56:9/FA20:4)	Triacylglycerides	1.50765	0.0130549	0.035484
HFD-DEN-Liver_CD_Vehicle_Liver	TG(56:3/FA18:0)	Triacylglycerides	4.07822	0.0130222	0.035484
HFD-DEN-Liver_CD_Vehicle_Liver	TG(56:8/FA22:4)	Triacylglycerides	2.35787	0.0130644	0.035484
HFD-DEN-Liver_CD_Vehicle_Liver	TG(60:6/FA20:3)	Triacylglycerides	4.95683	0.013097	0.0354984
HFD-DEN-Liver_CD_Vehicle_Liver	TG(50:4/FA18:2)	Triacylglycerides	1.691	0.0131813	0.0355809
HFD-DEN-Liver_CD_Vehicle_Liver	TG(52:7/FA16:1)	Triacylglycerides	1.41034	0.0132	0.0355809
HFD-DEN-Liver_CD_Vehicle_Liver	TG(60:9/FA18:1)	Triacylglycerides	2.90922	0.0132095	0.0355809
HFD-DEN-Liver_CD_Vehicle_Liver	TG(58:10/FA20:5)	Triacylglycerides	2.87297	0.0133376	0.0357779
HFD-DEN-Liver_CD_Vehicle_Liver	TG(62:14/FA22:6)	Triacylglycerides	3.06884	0.0133346	0.0357779
HFD-DEN-Liver_CD_Vehicle_Liver	SM(d18:1/18:1)	Sphingomyelins	0.545603	0.013448	0.0358644
HFD-DEN-Liver_CD_Vehicle_Liver	TG(56:4/FA18:2)	Triacylglycerides	3.45055	0.0134984	0.0358644
HFD-DEN-Liver_CD_Vehicle_Liver	TG(56:4/FA16:1)	Triacylglycerides	3.7774	0.0134681	0.0358644
HFD-DEN-Liver_CD_Vehicle_Liver	TG(60:8/FA20:2)	Triacylglycerides	3.31837	0.0134121	0.0358644
HFD-DEN-Liver_CD_Vehicle_Liver	PI(18:0/18:1)	Phosphatidylinositol	1.35702	0.0135077	0.0358644
HFD-DEN-Liver_CD_Vehicle_Liver	TG(62:10/FA20:3)	Triacylglycerides	3.25603	0.0137085	0.0363233
HFD-DEN-Liver_CD_Vehicle_Liver	TG(50:2/FA18:1)	Triacylglycerides	3.18217	0.0138038	0.0365015
HFD-DEN-Liver_CD_Vehicle_Liver	TG(58:10/FA16:1)	Triacylglycerides	3.05085	0.0138431	0.0365312
HFD-DEN-Liver_CD_Vehicle_Liver	TG(56:10/FA22:6)	Triacylglycerides	2.15295	0.0139158	0.0365748
HFD-DEN-Liver_CD_Vehicle_Liver	TG(60:6/FA20:4)	Triacylglycerides	3.91192	0.0138931	0.0365748
HFD-DEN-Liver_CD_Vehicle_Liver	TG(58:4/FA16:0)	Triacylglycerides	3.93902	0.0139633	0.036609
HFD-DEN-Liver_CD_Vehicle_Liver	TG(62:12/FA18:1)	Triacylglycerides	3.87874	0.0140414	0.036609
HFD-DEN-Liver_CD_Vehicle_Liver	PE(14:0/18:2)	Phosphatidylethanolamine	-1.37047	0.0140059	0.036609
HFD-DEN-Liver_CD_Vehicle_Liver	PE(20:0/20:3)	Phosphatidylethanolamine	1.15235	0.0140377	0.036609
HFD-DEN-Liver_CD_Vehicle_Liver	PC(18:2/20:2)	Phosphatidylcholine	-0.800974	0.0141275	0.036749
HFD-DEN-Liver_CD_Vehicle_Liver	PC(P-18:0/18:0)	1-alkenyl,Phosphatidylcholine	0.450001	0.0141516	0.036749
HFD-DEN-Liver_CD_Vehicle_Liver	PC(16:2/18:0)	Phosphatidylcholine	0.281459	0.0142336	0.0368882
HFD-DEN-Liver_CD_Vehicle_Liver	TG(56:5/FA20:3)	Triacylglycerides	3.97356	0.0143342	0.0370752
HFD-DEN-Liver_CD_Vehicle_Liver	TG(58:6/FA22:2)	Triacylglycerides	2.24717	0.0144537	0.0373102
HFD-DEN-Liver_CD_Vehicle_Liver	TG(56:3/FA16:1)	Triacylglycerides	4.41374	0.0145275	0.0374263
HFD-DEN-Liver_CD_Vehicle_Liver	TG(52:1/FA16:0)	Triacylglycerides	4.08117	0.0146461	0.0375081
HFD-DEN-Liver_CD_Vehicle_Liver	TG(56:7/FA18:3)	Triacylglycerides	2.35016	0.0146746	0.0375081
HFD-DEN-Liver_CD_Vehicle_Liver	TG(56:9/FA18:1)	Triacylglycerides	3.80111	0.0146204	0.0375081
HFD-DEN-Liver_CD_Vehicle_Liver	PC(18:0/22:4)	Phosphatidylcholine	1.07699	0.0146247	0.0375081
HFD-DEN-Liver_CD_Vehicle_Liver	TG(54:4/FA18:1)	Triacylglycerides	2.98356	0.0147374	0.0375949
HFD-DEN-Liver_CD_Vehicle_Liver	TG(54:6/FA18:2)	Triacylglycerides	1.53415	0.0149068	0.0379526
HFD-DEN-Liver_CD_Vehicle_Liver	PE(16:0/20:5)	Phosphatidylethanolamine	-0.966705	0.0149876	0.0380837
HFD-DEN-Liver_CD_Vehicle_Liver	TG(56:5/FA18:2)	Triacylglycerides	2.87272	0.01506	0.038193
HFD-DEN-Liver_CD_Vehicle_Liver	PE(18:0/22:2)	Phosphatidylethanolamine	0.369297	0.0152903	0.0387016
HFD-DEN-Liver_CD_Vehicle_Liver	TG(52:5/FA16:0)	Triacylglycerides	1.70692	0.015346	0.0387673
HFD-DEN-Liver_CD_Vehicle_Liver	TG(54:4/FA22:2)	Triacylglycerides	2.67766	0.0155048	0.0390926
HFD-DEN-Liver_CD_Vehicle_Liver	TG(58:5/FA20:3)	Triacylglycerides	4.28997	0.0155399	0.0391051
HFD-DEN-Liver_CD_Vehicle_Liver	TG(50:3/FA16:1)	Triacylglycerides	2.65673	0.0156493	0.0392333
HFD-DEN-Liver_CD_Vehicle_Liver	TG(58:3/FA18:0)	Triacylglycerides	3.72914	0.0156959	0.0392333
HFD-DEN-Liver_CD_Vehicle_Liver	TG(58:5/FA18:1)	Triacylglycerides	4.09637	0.0156923	0.0392333
HFD-DEN-Liver_CD_Vehicle_Liver	TG(58:5/FA22:4)	Triacylglycerides	4.06625	0.0157114	0.0392333
HFD-DEN-Liver_CD_Vehicle_Liver	PC(P-20:0/20:4)	1-alkenyl,Phosphatidylcholine	0.746243	0.0157832	0.0393371
HFD-DEN-Liver_CD_Vehicle_Liver	TG(58:5/FA22:2)	Triacylglycerides	3.28555	0.0159102	0.0395021
HFD-DEN-Liver_CD_Vehicle_Liver	TG(62:11/FA20:2)	Triacylglycerides	2.16512	0.0159006	0.0395021
HFD-DEN-Liver_CD_Vehicle_Liver	TG(60:7/FA18:1)	Triacylglycerides	3.48988	0.0160258	0.0397134
HFD-DEN-Liver_CD_Vehicle_Liver	TG(66:16/FA22:6)	Triacylglycerides	3.65579	0.0161572	0.0399629
HFD-DEN-Liver_CD_Vehicle_Liver	PG(14:0/16:0)	Phosphatidylglycerol	-2.34461	0.0162532	0.040124
HFD-DEN-Liver_CD_Vehicle_Liver	TG(54:9/FA16:1)	Triacylglycerides	2.83195	0.0163563	0.0403023
HFD-DEN-Liver_CD_Vehicle_Liver	TG(54:8/FA20:4)	Triacylglycerides	1.80296	0.0165463	0.0406933
HFD-DEN-Liver_CD_Vehicle_Liver	TG(60:8/FA18:1)	Triacylglycerides	3.29032	0.0167358	0.0410042
HFD-DEN-Liver_CD_Vehicle_Liver	TG(64:13/FA22:6)	Triacylglycerides	3.49553	0.0167263	0.0410042
HFD-DEN-Liver_CD_Vehicle_Liver	TG(54:4/FA18:2)	Triacylglycerides	3.02306	0.0168527	0.0411358
HFD-DEN-Liver_CD_Vehicle_Liver	PE(16:1/18:3)	Phosphatidylethanolamine	-2.22167	0.0168366	0.0411358
HFD-DEN-Liver_CD_Vehicle_Liver	Cer(d18:1/22:3)	Ceramides	1.48212	0.0171148	0.0416974
HFD-DEN-Liver_CD_Vehicle_Liver	PE(18:0/20:4)	Phosphatidylethanolamine	0.352244	0.0172998	0.0420692
HFD-DEN-Liver_CD_Vehicle_Liver	CE(22:6)	Cholesterol Esters	2.20395	0.0174579	0.0423006
HFD-DEN-Liver_CD_Vehicle_Liver	TG(60:6/FA18:1)	Triacylglycerides	4.27485	0.01746	0.0423006
HFD-DEN-Liver_CD_Vehicle_Liver	TG(48:2/FA16:0)	Triacylglycerides	1.83693	0.0177123	0.0427528
HFD-DEN-Liver_CD_Vehicle_Liver	TG(54:8/FA20:5)	Triacylglycerides	1.93878	0.0177008	0.0427528
HFD-DEN-Liver_CD_Vehicle_Liver	PC(20:4/20:4)	Phosphatidylcholine	-0.817082	0.0178079	0.0429039
HFD-DEN-Liver_CD_Vehicle_Liver	PI(16:0/20:3)	Phosphatidylinositol	0.627434	0.0178617	0.0429539
HFD-DEN-Liver_CD_Vehicle_Liver	PE(18:2/20:2)	Phosphatidylethanolamine	-0.958089	0.0178956	0.0429561
HFD-DEN-Liver_CD_Vehicle_Liver	TG(56:10/FA18:3)	Triacylglycerides	1.87195	0.0180971	0.0432805
HFD-DEN-Liver_CD_Vehicle_Liver	PC(16:0/20:5)	Phosphatidylcholine	-0.715454	0.0180973	0.0432805
HFD-DEN-Liver_CD_Vehicle_Liver	TG(56:5/FA16:1)	Triacylglycerides	3.60977	0.0181598	0.0433503
HFD-DEN-Liver_CD_Vehicle_Liver	TG(48:2/FA16:1)	Triacylglycerides	2.00513	0.0184556	0.0439618
HFD-DEN-Liver_CD_Vehicle_Liver	PE(20:0/20:5)	Phosphatidylethanolamine	-0.794283	0.0184836	0.0439618
HFD-DEN-Liver_CD_Vehicle_Liver	PC(O-16:0/16:1)	1-alkyl,Phosphatidylcholine	-0.939328	0.0185335	0.0440001
HFD-DEN-Liver_CD_Vehicle_Liver	PC(O-16:0/18:3)	1-alkyl,Phosphatidylcholine	-0.60036	0.0186193	0.0441233
HFD-DEN-Liver_CD_Vehicle_Liver	PC(O-16:0/20:4)	1-alkyl,Phosphatidylcholine	0.484037	0.0188933	0.0446912
HFD-DEN-Liver_CD_Vehicle_Liver	Cer(d18:1/14:1)	Ceramides	0.714716	0.0189677	0.0447857
HFD-DEN-Liver_CD_Vehicle_Liver	TG(62:9/FA20:2)	Triacylglycerides	2.49251	0.0190352	0.0448407
HFD-DEN-Liver_CD_Vehicle_Liver	PE(20:5/22:2)	Phosphatidylethanolamine	-1.03557	0.0190599	0.0448407
HFD-DEN-Liver_CD_Vehicle_Liver	TG(58:10/FA20:2)	Triacylglycerides	2.87075	0.0196028	0.0460348
HFD-DEN-Liver_CD_Vehicle_Liver	PC(18:0/22:6)	Phosphatidylcholine	0.366079	0.0198792	0.0465997
HFD-DEN-Liver_CD_Vehicle_Liver	PS(16:0/20:4)	Phosphatidylserine	-0.628122	0.0201356	0.0471159
HFD-DEN-Liver_CD_Vehicle_Liver	TG(62:8/FA22:6)	Triacylglycerides	5.12311	0.0201864	0.0471499
HFD-DEN-Liver_CD_Vehicle_Liver	Cer(d18:1/18:1)	Ceramides	1.49105	0.0203021	0.0473352
HFD-DEN-Liver_CD_Vehicle_Liver	TG(62:5/FA18:1)	Triacylglycerides	3.4377	0.020925	0.0487003
HFD-DEN-Liver_CD_Vehicle_Liver	TG(62:14/FA18:2)	Triacylglycerides	3.49024	0.0209956	0.0487083
HFD-DEN-Liver_CD_Vehicle_Liver	PE(16:0/20:4)	Phosphatidylethanolamine	-0.233861	0.0210034	0.0487083
HFD-DEN-Liver_CD_Vehicle_Liver	TG(60:4/FA20:2)	Triacylglycerides	5.19984	0.0211248	0.0489029
HFD-DEN-Liver_CD_Vehicle_Liver	TG(58:11/FA18:1)	Triacylglycerides	3.71586	0.021252	0.0491098
HFD-DEN-Liver_CD_Vehicle_Liver	PC(P-16:0/18:0)	1-alkenyl,Phosphatidylcholine	0.929358	0.0214234	0.0494181
HFD-DEN-Liver_CD_Vehicle_Liver	TG(60:12/FA22:4)	Triacylglycerides	2.90823	0.0216764	0.0497491
HFD-DEN-Liver_CD_Vehicle_Liver	TG(62:12/FA20:5)	Triacylglycerides	3.12091	0.0216816	0.0497491
HFD-DEN-Liver_CD_Vehicle_Liver	PE(16:0/18:3)	Phosphatidylethanolamine	-1.78145	0.0216656	0.0497491
HFD-DEN-Tumor_CD_Vehicle_Liver	PC(14:1/18:3)	Phosphatidylcholine	-4.3931	2.1e-07	0.00029381
HFD-DEN-Tumor_CD_Vehicle_Liver	PC(18:1/18:3)	Phosphatidylcholine	-1.65346	3.73e-06	0.00256401
HFD-DEN-Tumor_CD_Vehicle_Liver	PE(18:3/20:4)	Phosphatidylethanolamine	-2.64742	7.57e-06	0.00347192
HFD-DEN-Tumor_CD_Vehicle_Liver	PC(P-16:0/18:0)	1-alkenyl,Phosphatidylcholine	2.38264	1.431e-05	0.00492098
HFD-DEN-Tumor_CD_Vehicle_Liver	PC(14:1/18:0)	Phosphatidylcholine	2.29473	1.888e-05	0.0049507
HFD-DEN-Tumor_CD_Vehicle_Liver	PC(16:1/18:2)	Phosphatidylcholine	-2.13052	2.159e-05	0.0049507
HFD-DEN-Tumor_CD_Vehicle_Liver	PC(18:2/20:3)	Phosphatidylcholine	-2.02899	3.239e-05	0.00495158
HFD-DEN-Tumor_CD_Vehicle_Liver	PC(20:3/20:4)	Phosphatidylcholine	-1.83422	2.636e-05	0.00495158
HFD-DEN-Tumor_CD_Vehicle_Liver	PI(18:1/18:1)	Phosphatidylinositol	1.20721	2.945e-05	0.00495158
HFD-DEN-Tumor_CD_Vehicle_Liver	PC(P-18:0/18:3)	1-alkenyl,Phosphatidylcholine	-1.01832	4.363e-05	0.00600294
HFD-DEN-Tumor_CD_Vehicle_Liver	PC(18:1/18:2)	Phosphatidylcholine	-1.56492	8.414e-05	0.00704111
HFD-DEN-Tumor_CD_Vehicle_Liver	PC(18:2/18:3)	Phosphatidylcholine	-2.90427	9.807e-05	0.00704111
HFD-DEN-Tumor_CD_Vehicle_Liver	PC(18:2/20:1)	Phosphatidylcholine	-1.743	0.00010535	0.00704111
HFD-DEN-Tumor_CD_Vehicle_Liver	PC(18:2/22:6)	Phosphatidylcholine	-2.29208	6.011e-05	0.00704111
HFD-DEN-Tumor_CD_Vehicle_Liver	PC(P-16:0/18:2)	1-alkenyl,Phosphatidylcholine	-0.8985	9.306e-05	0.00704111
HFD-DEN-Tumor_CD_Vehicle_Liver	PE(16:1/22:4)	Phosphatidylethanolamine	-1.07399	8.952e-05	0.00704111
HFD-DEN-Tumor_CD_Vehicle_Liver	PE(18:2/20:1)	Phosphatidylethanolamine	-1.32541	7.539e-05	0.00704111
HFD-DEN-Tumor_CD_Vehicle_Liver	PE(18:2/22:4)	Phosphatidylethanolamine	-1.0437	0.00011065	0.00704111
HFD-DEN-Tumor_CD_Vehicle_Liver	PE(18:3/22:6)	Phosphatidylethanolamine	-3.24126	7.465e-05	0.00704111
HFD-DEN-Tumor_CD_Vehicle_Liver	PE(P-18:0/22:4)	1-alkenyl,Phosphoethanolamine	1.08808	0.00011258	0.00704111
HFD-DEN-Tumor_CD_Vehicle_Liver	PG(16:1/18:3)	Phosphatidylglycerol	-3.27984	8.562e-05	0.00704111
HFD-DEN-Tumor_CD_Vehicle_Liver	PS(16:1/20:4)	Phosphatidylserine	-1.69886	8.391e-05	0.00704111
HFD-DEN-Tumor_CD_Vehicle_Liver	DG(20:4/20:4)	Diacylglycerides	1.42243	0.00016659	0.00716318
HFD-DEN-Tumor_CD_Vehicle_Liver	PC(18:2/20:4)	Phosphatidylcholine	-1.73347	0.00015888	0.00716318
HFD-DEN-Tumor_CD_Vehicle_Liver	PC(20:1/22:6)	Phosphatidylcholine	-1.68788	0.00016314	0.00716318
HFD-DEN-Tumor_CD_Vehicle_Liver	PC(O-16:0/18:0)	1-alkyl,Phosphatidylcholine	2.57551	0.00013725	0.00716318
HFD-DEN-Tumor_CD_Vehicle_Liver	PE(16:1/20:2)	Phosphatidylethanolamine	-1.99704	0.00015322	0.00716318
HFD-DEN-Tumor_CD_Vehicle_Liver	PE(18:0/22:4)	Phosphatidylethanolamine	1.27366	0.00013967	0.00716318
HFD-DEN-Tumor_CD_Vehicle_Liver	PE(20:4/22:4)	Phosphatidylethanolamine	-1.77698	0.00013127	0.00716318
HFD-DEN-Tumor_CD_Vehicle_Liver	PS(16:0/20:4)	Phosphatidylserine	-1.53763	0.00015636	0.00716318
HFD-DEN-Tumor_CD_Vehicle_Liver	PS(18:1/20:4)	Phosphatidylserine	-1.52485	0.00012938	0.00716318
HFD-DEN-Tumor_CD_Vehicle_Liver	PS(18:3/20:4)	Phosphatidylserine	-2.31953	0.00014725	0.00716318
HFD-DEN-Tumor_CD_Vehicle_Liver	PC(20:4/22:6)	Phosphatidylcholine	-2.08324	0.00019106	0.00796651
HFD-DEN-Tumor_CD_Vehicle_Liver	PC(14:1/20:3)	Phosphatidylcholine	-2.93395	0.0002013	0.00814688
HFD-DEN-Tumor_CD_Vehicle_Liver	PI(18:2/18:2)	Phosphatidylinositol	-3.47063	0.0002436	0.00957715
HFD-DEN-Tumor_CD_Vehicle_Liver	PE(18:3/20:1)	Phosphatidylethanolamine	-1.29329	0.00026312	0.010057
HFD-DEN-Tumor_CD_Vehicle_Liver	SM(d18:1/16:0)	Sphingomyelins	1.55827	0.00028639	0.0101045
HFD-DEN-Tumor_CD_Vehicle_Liver	SM(d18:1/18:1)	Sphingomyelins	1.29662	0.00028023	0.0101045
HFD-DEN-Tumor_CD_Vehicle_Liver	PE(18:1/18:2)	Phosphatidylethanolamine	-1.34127	0.00027728	0.0101045
HFD-DEN-Tumor_CD_Vehicle_Liver	PE(18:1/20:5)	Phosphatidylethanolamine	-1.64902	0.00032892	0.0107289
HFD-DEN-Tumor_CD_Vehicle_Liver	PE(18:2/20:3)	Phosphatidylethanolamine	-1.03864	0.00032883	0.0107289
HFD-DEN-Tumor_CD_Vehicle_Liver	PE(18:3/22:4)	Phosphatidylethanolamine	-1.60607	0.00032583	0.0107289
HFD-DEN-Tumor_CD_Vehicle_Liver	PG(18:2/18:3)	Phosphatidylglycerol	-3.53499	0.00033528	0.0107289
HFD-DEN-Tumor_CD_Vehicle_Liver	PC(18:2/22:5)	Phosphatidylcholine	-2.65828	0.00034467	0.0107786
HFD-DEN-Tumor_CD_Vehicle_Liver	PE(18:2/20:5)	Phosphatidylethanolamine	-2.52446	0.00035397	0.0108235
HFD-DEN-Tumor_CD_Vehicle_Liver	PC(18:1/20:5)	Phosphatidylcholine	-1.22531	0.00038194	0.011182
HFD-DEN-Tumor_CD_Vehicle_Liver	PE(O-18:0/22:4)	1-alkyl,Phosphoethanolamine	0.804634	0.00037786	0.011182
HFD-DEN-Tumor_CD_Vehicle_Liver	PC(18:0/20:2)	Phosphatidylcholine	1.59998	0.0004401	0.0122386
HFD-DEN-Tumor_CD_Vehicle_Liver	PE(18:2/18:2)	Phosphatidylethanolamine	-2.51034	0.00043064	0.0122386
HFD-DEN-Tumor_CD_Vehicle_Liver	PE(O-18:0/22:6)	1-alkyl,Phosphoethanolamine	1.12514	0.00044471	0.0122386
HFD-DEN-Tumor_CD_Vehicle_Liver	PC(18:1/22:6)	Phosphatidylcholine	-1.24197	0.00046689	0.012597
HFD-DEN-Tumor_CD_Vehicle_Liver	Cer(d18:1/18:0)	Ceramides	3.03413	0.00048626	0.0128352
HFD-DEN-Tumor_CD_Vehicle_Liver	Cer(d18:1/22:3)	Ceramides	1.71272	0.0005013	0.0128352
HFD-DEN-Tumor_CD_Vehicle_Liver	PC(P-16:0/20:5)	1-alkenyl,Phosphatidylcholine	-1.69098	0.00050371	0.0128352
HFD-DEN-Tumor_CD_Vehicle_Liver	PE(20:2/20:2)	Phosphatidylethanolamine	-1.10506	0.00052838	0.013219
HFD-DEN-Tumor_CD_Vehicle_Liver	PE(18:3/20:2)	Phosphatidylethanolamine	-3.17461	0.00054297	0.0133417
HFD-DEN-Tumor_CD_Vehicle_Liver	PC(18:2/18:2)	Phosphatidylcholine	-2.52085	0.00062804	0.0150105
HFD-DEN-Tumor_CD_Vehicle_Liver	PC(20:1/20:4)	Phosphatidylcholine	-0.615488	0.00067155	0.0150105
HFD-DEN-Tumor_CD_Vehicle_Liver	PC(20:4/20:4)	Phosphatidylcholine	-3.1756	0.00065991	0.0150105
HFD-DEN-Tumor_CD_Vehicle_Liver	PC(P-18:0/18:2)	1-alkenyl,Phosphatidylcholine	-0.861195	0.00069816	0.0150105
HFD-DEN-Tumor_CD_Vehicle_Liver	PG(16:1/18:2)	Phosphatidylglycerol	-2.44667	0.00065719	0.0150105
HFD-DEN-Tumor_CD_Vehicle_Liver	PG(18:2/18:2)	Phosphatidylglycerol	-1.0373	0.00068855	0.0150105
HFD-DEN-Tumor_CD_Vehicle_Liver	PI(18:0/18:1)	Phosphatidylinositol	3.27419	0.00068258	0.0150105
HFD-DEN-Tumor_CD_Vehicle_Liver	PI(18:0/20:4)	Phosphatidylinositol	0.833378	0.00068701	0.0150105
HFD-DEN-Tumor_CD_Vehicle_Liver	PE(18:0/22:6)	Phosphatidylethanolamine	2.40041	0.00072038	0.0152499
HFD-DEN-Tumor_CD_Vehicle_Liver	PC(16:1/22:6)	Phosphatidylcholine	-0.931302	0.00084097	0.0175329
HFD-DEN-Tumor_CD_Vehicle_Liver	PC(16:1/20:2)	Phosphatidylcholine	-1.67749	0.00085456	0.0175504
HFD-DEN-Tumor_CD_Vehicle_Liver	PC(18:2/20:2)	Phosphatidylcholine	-1.86606	0.00093585	0.0189372
HFD-DEN-Tumor_CD_Vehicle_Liver	PC(14:1/18:2)	Phosphatidylcholine	-2.19609	0.00101756	0.0200023
HFD-DEN-Tumor_CD_Vehicle_Liver	PE(18:0/20:3)	Phosphatidylethanolamine	1.17927	0.00101359	0.0200023
HFD-DEN-Tumor_CD_Vehicle_Liver	PE(16:1/20:4)	Phosphatidylethanolamine	-1.87087	0.00106616	0.0206624
HFD-DEN-Tumor_CD_Vehicle_Liver	PE(20:4/22:2)	Phosphatidylethanolamine	0.450256	0.00113659	0.0217214
HFD-DEN-Tumor_CD_Vehicle_Liver	Cer(d18:1/16:0)	Ceramides	2.46216	0.0011692	0.0220386
HFD-DEN-Tumor_CD_Vehicle_Liver	PE(P-18:0/20:4)	1-alkenyl,Phosphoethanolamine	1.13293	0.00119142	0.022154
HFD-DEN-Tumor_CD_Vehicle_Liver	PE(20:3/20:4)	Phosphatidylethanolamine	-1.79451	0.00123607	0.0226778
HFD-DEN-Tumor_CD_Vehicle_Liver	PC(14:1/16:0)	Phosphatidylcholine	0.681666	0.00130664	0.023657
HFD-DEN-Tumor_CD_Vehicle_Liver	SM(d18:1/22:6)	Sphingomyelins	-1.93544	0.001351	0.0241425
HFD-DEN-Tumor_CD_Vehicle_Liver	SM(d18:1/22:1)	Sphingomyelins	-0.650461	0.00149587	0.025857
HFD-DEN-Tumor_CD_Vehicle_Liver	TG(60:10/FA18:3)	Triacylglycerides	2.86828	0.00155024	0.025857
HFD-DEN-Tumor_CD_Vehicle_Liver	TG(62:10/FA20:3)	Triacylglycerides	4.91869	0.00155306	0.025857
HFD-DEN-Tumor_CD_Vehicle_Liver	PC(14:1/16:1)	Phosphatidylcholine	-1.43854	0.00160826	0.025857
HFD-DEN-Tumor_CD_Vehicle_Liver	PC(18:3/20:4)	Phosphatidylcholine	-1.40389	0.0016125	0.025857
HFD-DEN-Tumor_CD_Vehicle_Liver	PE(16:1/20:3)	Phosphatidylethanolamine	-1.53766	0.00156515	0.025857
HFD-DEN-Tumor_CD_Vehicle_Liver	PE(18:0/20:1)	Phosphatidylethanolamine	1.29603	0.00146575	0.025857
HFD-DEN-Tumor_CD_Vehicle_Liver	PE(20:5/22:5)	Phosphatidylethanolamine	0.528592	0.00152123	0.025857
HFD-DEN-Tumor_CD_Vehicle_Liver	LPE(18:2)	Lysophosphatidylethanolamine	-1.21195	0.00161606	0.025857
HFD-DEN-Tumor_CD_Vehicle_Liver	TG(62:11/FA20:3)	Triacylglycerides	5.30345	0.00166102	0.0259723
HFD-DEN-Tumor_CD_Vehicle_Liver	TG(64:11/FA22:5)	Triacylglycerides	6.43465	0.00165141	0.0259723
HFD-DEN-Tumor_CD_Vehicle_Liver	PE(20:1/20:3)	Phosphatidylethanolamine	-0.708987	0.00174583	0.0267103
HFD-DEN-Tumor_CD_Vehicle_Liver	PE(O-18:0/20:3)	1-alkyl,Phosphoethanolamine	0.69741	0.00174704	0.0267103
HFD-DEN-Tumor_CD_Vehicle_Liver	PC(16:1/16:1)	Phosphatidylcholine	-2.01013	0.00176906	0.0267498
HFD-DEN-Tumor_CD_Vehicle_Liver	CE(20:4)	Cholesterol Esters	2.6584	0.00187619	0.0274558
HFD-DEN-Tumor_CD_Vehicle_Liver	PC(16:0/20:1)	Phosphatidylcholine	0.419866	0.00185245	0.0274558
HFD-DEN-Tumor_CD_Vehicle_Liver	PE(18:2/18:3)	Phosphatidylethanolamine	-1.77672	0.00191552	0.0274558
HFD-DEN-Tumor_CD_Vehicle_Liver	PE(20:5/22:0)	Phosphatidylethanolamine	1.31514	0.00189753	0.0274558
HFD-DEN-Tumor_CD_Vehicle_Liver	PE(22:4/22:6)	Phosphatidylethanolamine	-1.17308	0.00191162	0.0274558
HFD-DEN-Tumor_CD_Vehicle_Liver	PE(16:1/18:2)	Phosphatidylethanolamine	-2.47915	0.00197332	0.0279927
HFD-DEN-Tumor_CD_Vehicle_Liver	PC(16:1/18:3)	Phosphatidylcholine	-2.19367	0.00208583	0.0292868
HFD-DEN-Tumor_CD_Vehicle_Liver	SM(d18:1/24:1)	Sphingomyelins	0.74214	0.0021128	0.0293658
HFD-DEN-Tumor_CD_Vehicle_Liver	PE(18:1/18:3)	Phosphatidylethanolamine	-1.89282	0.00216046	0.0295082
HFD-DEN-Tumor_CD_Vehicle_Liver	PE(20:3/22:6)	Phosphatidylethanolamine	-2.06097	0.00216593	0.0295082
HFD-DEN-Tumor_CD_Vehicle_Liver	SM(d18:1/18:0)	Sphingomyelins	2.05332	0.00238262	0.0309291
HFD-DEN-Tumor_CD_Vehicle_Liver	TG(56:4/FA16:1)	Triacylglycerides	3.09237	0.00236514	0.0309291
HFD-DEN-Tumor_CD_Vehicle_Liver	PE(14:1/18:0)	Phosphatidylethanolamine	1.08713	0.00236581	0.0309291
HFD-DEN-Tumor_CD_Vehicle_Liver	PE(20:1/20:2)	Phosphatidylethanolamine	-0.682614	0.00235524	0.0309291
HFD-DEN-Tumor_CD_Vehicle_Liver	PG(14:0/18:2)	Phosphatidylglycerol	-2.49813	0.00230687	0.0309291
HFD-DEN-Tumor_CD_Vehicle_Liver	PE(20:4/20:4)	Phosphatidylethanolamine	-1.37726	0.00248746	0.0319883
HFD-DEN-Tumor_CD_Vehicle_Liver	TG(62:9/FA22:6)	Triacylglycerides	5.44444	0.00262581	0.0326748
HFD-DEN-Tumor_CD_Vehicle_Liver	PC(16:1/20:3)	Phosphatidylcholine	-0.948414	0.00262907	0.0326748
HFD-DEN-Tumor_CD_Vehicle_Liver	PC(16:1/20:5)	Phosphatidylcholine	-1.4595	0.00262358	0.0326748
HFD-DEN-Tumor_CD_Vehicle_Liver	PE(18:2/20:2)	Phosphatidylethanolamine	-1.93808	0.0026394	0.0326748
HFD-DEN-Tumor_CD_Vehicle_Liver	PE(20:1/20:5)	Phosphatidylethanolamine	1.57934	0.00265958	0.0326748
HFD-DEN-Tumor_CD_Vehicle_Liver	PE(P-18:0/20:2)	1-alkenyl,Phosphoethanolamine	1.1062	0.00292719	0.0353317
HFD-DEN-Tumor_CD_Vehicle_Liver	PI(18:0/20:3)	Phosphatidylinositol	0.730137	0.00290594	0.0353317
HFD-DEN-Tumor_CD_Vehicle_Liver	PC(14:0/18:0)	Phosphatidylcholine	2.26007	0.00298176	0.0356459
HFD-DEN-Tumor_CD_Vehicle_Liver	PE(14:0/20:2)	Phosphatidylethanolamine	-1.44065	0.00303094	0.0356459
HFD-DEN-Tumor_CD_Vehicle_Liver	PG(16:0/20:2)	Phosphatidylglycerol	0.940126	0.00301601	0.0356459
HFD-DEN-Tumor_CD_Vehicle_Liver	PE(18:3/18:3)	Phosphatidylethanolamine	-4.45503	0.00318296	0.0371166
HFD-DEN-Tumor_CD_Vehicle_Liver	TG(62:5/FA18:1)	Triacylglycerides	4.86972	0.00323013	0.03735
HFD-DEN-Tumor_CD_Vehicle_Liver	Cer(d18:1/22:4)	Ceramides	1.47175	0.00329015	0.0377271
HFD-DEN-Tumor_CD_Vehicle_Liver	TG(60:9/FA20:3)	Triacylglycerides	6.33928	0.00334201	0.0380045
HFD-DEN-Tumor_CD_Vehicle_Liver	PC(16:2/18:2)	Phosphatidylcholine	-0.676442	0.00336959	0.0380045
HFD-DEN-Tumor_CD_Vehicle_Liver	Cer(d18:1/16:2)	Ceramides	2.85262	0.00341492	0.0382027
HFD-DEN-Tumor_CD_Vehicle_Liver	PC(16:1/18:1)	Phosphatidylcholine	-0.857948	0.00355981	0.0395024
HFD-DEN-Tumor_CD_Vehicle_Liver	PS(20:1/20:4)	Phosphatidylserine	-1.09055	0.0036682	0.0403795
HFD-DEN-Tumor_CD_Vehicle_Liver	TG(60:7/FA18:2)	Triacylglycerides	4.77918	0.00380045	0.0413179
HFD-DEN-Tumor_CD_Vehicle_Liver	LPE(20:5)	Lysophosphatidylethanolamine	-1.86944	0.00381349	0.0413179
HFD-DEN-Tumor_CD_Vehicle_Liver	PE(16:0/22:4)	Phosphatidylethanolamine	0.757873	0.00385296	0.0413567
HFD-DEN-Tumor_CD_Vehicle_Liver	PE(20:2/20:5)	Phosphatidylethanolamine	-2.31866	0.00392784	0.0413567
HFD-DEN-Tumor_CD_Vehicle_Liver	PE(22:1/22:2)	Phosphatidylethanolamine	1.88782	0.00396736	0.0413567
HFD-DEN-Tumor_CD_Vehicle_Liver	LPE(20:4)	Lysophosphatidylethanolamine	-0.528634	0.00394494	0.0413567
HFD-DEN-Tumor_CD_Vehicle_Liver	PG(16:1/20:1)	Phosphatidylglycerol	-1.5208	0.00391893	0.0413567
HFD-DEN-Tumor_CD_Vehicle_Liver	PC(P-16:0/16:0)	1-alkenyl,Phosphatidylcholine	0.698373	0.00404021	0.0417995
HFD-DEN-Tumor_CD_Vehicle_Liver	CE(20:1)	Cholesterol Esters	2.17385	0.00418713	0.0425996
HFD-DEN-Tumor_CD_Vehicle_Liver	PC(16:1/20:4)	Phosphatidylcholine	-0.665033	0.00421043	0.0425996
HFD-DEN-Tumor_CD_Vehicle_Liver	PC(O-16:0/20:4)	1-alkyl,Phosphatidylcholine	0.509154	0.00417618	0.0425996
HFD-DEN-Tumor_CD_Vehicle_Liver	PI(16:0/22:6)	Phosphatidylinositol	2.08431	0.00452975	0.0454959
HFD-DEN-Tumor_CD_Vehicle_Liver	PI(18:1/18:2)	Phosphatidylinositol	-1.09926	0.00464929	0.0463581
HFD-DEN-Tumor_CD_Vehicle_Liver	CE(22:6)	Cholesterol Esters	3.72936	0.00475721	0.047093
HFD-DEN-Tumor_CD_Vehicle_Liver	PC(O-16:0/16:0)	1-alkyl,Phosphatidylcholine	0.944818	0.00480516	0.0472279
HFD-DEN-Tumor_CD_Vehicle_Liver	PE(16:1/22:6)	Phosphatidylethanolamine	-1.43234	0.00485473	0.0473766
HFD-DEN-Tumor_CD_Vehicle_Liver	TG(60:9/FA20:5)	Triacylglycerides	5.23249	0.00497039	0.047827
HFD-DEN-Tumor_CD_Vehicle_Liver	PC(16:0/18:2)	Phosphatidylcholine	-0.566966	0.0049362	0.047827
HFD-DEN-Tumor_CD_Vehicle_Liver	LPE(18:3)	Lysophosphatidylethanolamine	-1.70703	0.00521702	0.0498515
HFD-DEN-Tumor_HFD-DEN-Liver	PC(14:1/18:0)	Phosphatidylcholine	1.66599	4.28e-06	0.00593112
HFD-DEN-Tumor_HFD-DEN-Liver	TG(64:10/FA20:3)	Triacylglycerides	2.04541	1.001e-05	0.00693153
HFD-DEN-Tumor_HFD-DEN-Liver	PC(16:1/18:2)	Phosphatidylcholine	-1.06115	4.935e-05	0.0116717
HFD-DEN-Tumor_HFD-DEN-Liver	PC(18:0/20:3)	Phosphatidylcholine	-0.752344	6.682e-05	0.0116717
HFD-DEN-Tumor_HFD-DEN-Liver	PC(18:2/18:2)	Phosphatidylcholine	-1.5487	6.373e-05	0.0116717
HFD-DEN-Tumor_HFD-DEN-Liver	PC(18:2/18:3)	Phosphatidylcholine	-1.25868	7.584e-05	0.0116717
HFD-DEN-Tumor_HFD-DEN-Liver	PC(20:4/20:4)	Phosphatidylcholine	-2.35852	6.833e-05	0.0116717
HFD-DEN-Tumor_HFD-DEN-Liver	PC(O-16:0/18:0)	1-alkyl,Phosphatidylcholine	1.78086	5.477e-05	0.0116717
HFD-DEN-Tumor_HFD-DEN-Liver	PC(P-16:0/18:0)	1-alkenyl,Phosphatidylcholine	1.45328	4.209e-05	0.0116717
HFD-DEN-Tumor_HFD-DEN-Liver	PC(18:2/20:3)	Phosphatidylcholine	-1.82146	0.00011285	0.0156292
HFD-DEN-Tumor_HFD-DEN-Liver	LPC(22:6)	Lysophosphatidylcholine	-0.763676	0.00012668	0.0159501
HFD-DEN-Tumor_HFD-DEN-Liver	PC(20:3/20:4)	Phosphatidylcholine	-1.76255	0.00014215	0.0164068
HFD-DEN-Tumor_HFD-DEN-Liver	PC(16:0/20:3)	Phosphatidylcholine	-0.664552	0.00016096	0.0171485
HFD-DEN-Tumor_HFD-DEN-Liver	SM(d18:1/22:1)	Sphingomyelins	-0.65654	0.00017874	0.017682
HFD-DEN-Tumor_HFD-DEN-Liver	SM(d18:1/16:0)	Sphingomyelins	0.961344	0.00025762	0.0178403
HFD-DEN-Tumor_HFD-DEN-Liver	SM(d18:1/18:1)	Sphingomyelins	0.751016	0.00023296	0.0178403
HFD-DEN-Tumor_HFD-DEN-Liver	PC(18:0/20:2)	Phosphatidylcholine	1.14942	0.00025677	0.0178403
HFD-DEN-Tumor_HFD-DEN-Liver	PE(18:0/22:6)	Phosphatidylethanolamine	1.85023	0.00023753	0.0178403
HFD-DEN-Tumor_HFD-DEN-Liver	PE(18:3/20:4)	Phosphatidylethanolamine	-0.941413	0.00022535	0.0178403
HFD-DEN-Tumor_HFD-DEN-Liver	PE(20:2/20:4)	Phosphatidylethanolamine	-0.908197	0.00022056	0.0178403
HFD-DEN-Tumor_HFD-DEN-Liver	SM(d18:1/14:0)	Sphingomyelins	0.849322	0.00031037	0.0186898
HFD-DEN-Tumor_HFD-DEN-Liver	PC(O-18:0/20:3)	1-alkyl,Phosphatidylcholine	-0.901689	0.00030681	0.0186898
HFD-DEN-Tumor_HFD-DEN-Liver	PE(O-18:0/22:6)	1-alkyl,Phosphoethanolamine	0.923753	0.00029586	0.0186898
HFD-DEN-Tumor_HFD-DEN-Liver	PC(18:1/18:2)	Phosphatidylcholine	-1.03434	0.00035396	0.0196095
HFD-DEN-Tumor_HFD-DEN-Liver	PE(18:2/20:3)	Phosphatidylethanolamine	-0.544394	0.00034275	0.0196095
HFD-DEN-Tumor_HFD-DEN-Liver	PC(20:1/22:6)	Phosphatidylcholine	-1.58118	0.00043214	0.0230197
HFD-DEN-Tumor_HFD-DEN-Liver	Cer(d18:1/16:0)	Ceramides	1.76329	0.0006275	0.0244038
HFD-DEN-Tumor_HFD-DEN-Liver	Cer(d18:1/18:0)	Ceramides	1.82554	0.00058617	0.0244038
HFD-DEN-Tumor_HFD-DEN-Liver	TG(60:9/FA16:1)	Triacylglycerides	1.98938	0.00054596	0.0244038
HFD-DEN-Tumor_HFD-DEN-Liver	PC(18:2/20:0)	Phosphatidylcholine	-1.84291	0.00060713	0.0244038
HFD-DEN-Tumor_HFD-DEN-Liver	PC(O-16:0/20:3)	1-alkyl,Phosphatidylcholine	-0.604761	0.00060625	0.0244038
HFD-DEN-Tumor_HFD-DEN-Liver	PE(16:0/16:0)	Phosphatidylethanolamine	0.844205	0.00063432	0.0244038
HFD-DEN-Tumor_HFD-DEN-Liver	PE(18:0/18:3)	Phosphatidylethanolamine	0.766655	0.00053006	0.0244038
HFD-DEN-Tumor_HFD-DEN-Liver	PE(18:0/22:4)	Phosphatidylethanolamine	0.651654	0.00058762	0.0244038
HFD-DEN-Tumor_HFD-DEN-Liver	PE(20:5/22:0)	Phosphatidylethanolamine	1.39053	0.00051955	0.0244038
HFD-DEN-Tumor_HFD-DEN-Liver	PI(18:0/18:1)	Phosphatidylinositol	1.91717	0.00048097	0.0244038
HFD-DEN-Tumor_HFD-DEN-Liver	TG(66:13/FA22:5)	Triacylglycerides	2.29361	0.00065586	0.0245505
HFD-DEN-Tumor_HFD-DEN-Liver	TG(62:11/FA20:3)	Triacylglycerides	2.94647	0.00071471	0.0256289
HFD-DEN-Tumor_HFD-DEN-Liver	PC(18:2/22:6)	Phosphatidylcholine	-1.12427	0.00072168	0.0256289
HFD-DEN-Tumor_HFD-DEN-Liver	LPE(20:5)	Lysophosphatidylethanolamine	-1.16009	0.00075696	0.0262097
HFD-DEN-Tumor_HFD-DEN-Liver	PC(18:1/20:4)	Phosphatidylcholine	-0.955526	0.00077875	0.0263066
HFD-DEN-Tumor_HFD-DEN-Liver	PE(20:1/20:5)	Phosphatidylethanolamine	1.45833	0.00080019	0.0263872
HFD-DEN-Tumor_HFD-DEN-Liver	TG(64:11/FA22:5)	Triacylglycerides	2.78168	0.00082538	0.0265848
HFD-DEN-Tumor_HFD-DEN-Liver	PC(20:4/22:6)	Phosphatidylcholine	-1.58924	0.000865	0.0272277
HFD-DEN-Tumor_HFD-DEN-Liver	PC(16:0/20:1)	Phosphatidylcholine	0.387593	0.00091243	0.0274722
HFD-DEN-Tumor_HFD-DEN-Liver	PE(18:1/18:2)	Phosphatidylethanolamine	-0.934743	0.00089264	0.0274722
HFD-DEN-Tumor_HFD-DEN-Liver	PC(18:1/22:6)	Phosphatidylcholine	-1.05588	0.00093666	0.0276016
HFD-DEN-Tumor_HFD-DEN-Liver	PE(20:2/20:3)	Phosphatidylethanolamine	-0.87744	0.00096854	0.0279463
HFD-DEN-Tumor_HFD-DEN-Liver	PC(14:1/18:3)	Phosphatidylcholine	-2.10354	0.00109676	0.0303802
HFD-DEN-Tumor_HFD-DEN-Liver	PC(18:2/20:1)	Phosphatidylcholine	-1.34272	0.00107552	0.0303802
HFD-DEN-Tumor_HFD-DEN-Liver	PC(14:0/16:0)	Phosphatidylcholine	1.36307	0.00112032	0.0304242
HFD-DEN-Tumor_HFD-DEN-Liver	PE(18:1/20:5)	Phosphatidylethanolamine	-0.958852	0.00117914	0.031406
HFD-DEN-Tumor_HFD-DEN-Liver	PC(14:0/18:0)	Phosphatidylcholine	1.76309	0.00128044	0.0328408
HFD-DEN-Tumor_HFD-DEN-Liver	PI(18:1/20:4)	Phosphatidylinositol	-0.942877	0.00127187	0.0328408
HFD-DEN-Tumor_HFD-DEN-Liver	PE(20:4/22:4)	Phosphatidylethanolamine	-1.10557	0.00139722	0.0351844
HFD-DEN-Tumor_HFD-DEN-Liver	PE(18:2/20:1)	Phosphatidylethanolamine	-0.761775	0.0015112	0.0373753
HFD-DEN-Tumor_HFD-DEN-Liver	PE(18:2/22:0)	Phosphatidylethanolamine	-1.30752	0.0015858	0.0385322
HFD-DEN-Tumor_HFD-DEN-Liver	PC(14:1/16:0)	Phosphatidylcholine	0.643302	0.00169519	0.0391473
HFD-DEN-Tumor_HFD-DEN-Liver	PC(18:1/20:3)	Phosphatidylcholine	-1.28013	0.00169591	0.0391473
HFD-DEN-Tumor_HFD-DEN-Liver	PC(18:2/20:2)	Phosphatidylcholine	-1.06509	0.00164889	0.0391473
HFD-DEN-Tumor_HFD-DEN-Liver	PC(P-16:0/22:6)	1-alkenyl,Phosphatidylcholine	0.732586	0.00173811	0.0394636
HFD-DEN-Tumor_HFD-DEN-Liver	PI(16:0/22:6)	Phosphatidylinositol	2.3148	0.00185222	0.0407195
HFD-DEN-Tumor_HFD-DEN-Liver	PI(18:1/18:2)	Phosphatidylinositol	-0.722135	0.0018296	0.0407195
HFD-DEN-Tumor_HFD-DEN-Liver	PE(18:0/18:1)	Phosphatidylethanolamine	1.09946	0.00201172	0.0428651
HFD-DEN-Tumor_HFD-DEN-Liver	LPE(20:4)	Lysophosphatidylethanolamine	-0.537254	0.0019838	0.0428651
HFD-DEN-Tumor_HFD-DEN-Liver	PE(18:0/20:1)	Phosphatidylethanolamine	0.681285	0.00208032	0.0436553
HFD-DEN-Tumor_HFD-DEN-Liver	PC(16:2/18:2)	Phosphatidylcholine	-0.450877	0.00217467	0.0449539
HFD-DEN-Tumor_HFD-Veh-Liver	PC(14:1/18:0)	Phosphatidylcholine	1.63562	7.76e-06	0.00780801
HFD-DEN-Tumor_HFD-Veh-Liver	PI(18:1/18:1)	Phosphatidylinositol	1.15093	1.077e-05	0.00780801
HFD-DEN-Tumor_HFD-Veh-Liver	PC(P-16:0/18:0)	1-alkenyl,Phosphatidylcholine	1.51822	1.696e-05	0.00819963
HFD-DEN-Tumor_HFD-Veh-Liver	PC(O-16:0/18:0)	1-alkyl,Phosphatidylcholine	1.77078	6.183e-05	0.017931
HFD-DEN-Tumor_HFD-Veh-Liver	PE(18:0/18:3)	Phosphatidylethanolamine	1.32029	5.08e-05	0.017931
HFD-DEN-Tumor_HFD-Veh-Liver	PE(20:4/22:4)	Phosphatidylethanolamine	-1.2133	0.00010096	0.0243995
HFD-DEN-Tumor_HFD-Veh-Liver	PC(18:1/20:4)	Phosphatidylcholine	-0.9326	0.00019975	0.0362053
HFD-DEN-Tumor_HFD-Veh-Liver	PI(18:0/18:1)	Phosphatidylinositol	2.42897	0.00019943	0.0362053
HFD-DEN-Tumor_HFD-Veh-Liver	SM(d18:1/16:0)	Sphingomyelins	1.01267	0.00034414	0.0428618
HFD-DEN-Tumor_HFD-Veh-Liver	PC(18:0/20:2)	Phosphatidylcholine	1.3994	0.00031599	0.0428618
HFD-DEN-Tumor_HFD-Veh-Liver	PC(18:1/22:6)	Phosphatidylcholine	-1.0856	0.00038045	0.0428618
HFD-DEN-Tumor_HFD-Veh-Liver	PC(18:2/20:4)	Phosphatidylcholine	-1.09319	0.00038428	0.0428618
HFD-DEN-Tumor_HFD-Veh-Liver	PE(18:0/22:6)	Phosphatidylethanolamine	1.79445	0.00032914	0.0428618
HFD-DEN-Tumor_HFD-Veh-Liver	PE(O-18:0/22:6)	1-alkyl,Phosphoethanolamine	0.865268	0.00043348	0.0448961
HFD-DEN-Tumor_HFD-Veh-Liver	PC(20:1/22:6)	Phosphatidylcholine	-1.12172	0.000504	0.0456751
HFD-DEN-Tumor_HFD-Veh-Liver	PE(P-18:0/20:2)	1-alkenyl,Phosphoethanolamine	1.35438	0.00047828	0.0456751
HFD-DEN-Tumor_HFD-Veh-Liver	PC(16:0/20:1)	Phosphatidylcholine	0.739475	0.00060578	0.0474186
HFD-DEN-Tumor_HFD-Veh-Liver	PE(18:0/20:1)	Phosphatidylethanolamine	0.952781	0.00062135	0.0474186
HFD-DEN-Tumor_HFD-Veh-Liver	PE(O-18:0/20:3)	1-alkyl,Phosphoethanolamine	0.894862	0.00057573	0.0474186
HFD-DEN-Tumor_HFD-Veh-Liver	PE(20:5/22:0)	Phosphatidylethanolamine	1.22865	0.00065635	0.0475851
HFD-DEN-Tumor_HFD-Veh-Liver	Cer(d18:1/18:0)	Ceramides	1.50701	0.00071774	0.0482054
HFD-DEN-Tumor_HFD-Veh-Liver	PI(16:0/18:3)	Phosphatidylinositol	2.03906	0.00073139	0.0482054
HFD-DEN-Tumor_HFD-Veh-Liver	Cer(d18:1/16:0)	Ceramides	1.70219	0.00077257	0.048541
HFD-DEN-Tumor_HFD-Veh-Liver	PE(16:1/18:0)	Phosphatidylethanolamine	0.579188	0.00083691	0.048541
HFD-DEN-Tumor_HFD-Veh-Liver	PE(20:1/20:5)	Phosphatidylethanolamine	1.52381	0.00083563	0.048541
HFD-DEN-Tumor_HFD-Veh-Liver	TG(60:9/FA16:1)	Triacylglycerides	1.45577	0.00097314	0.0494011
HFD-DEN-Tumor_HFD-Veh-Liver	TG(64:11/FA22:5)	Triacylglycerides	2.50359	0.00098997	0.0494011
HFD-DEN-Tumor_HFD-Veh-Liver	PC(18:2/20:3)	Phosphatidylcholine	-1.11427	0.00102209	0.0494011
HFD-DEN-Tumor_HFD-Veh-Liver	PC(P-16:0/20:5)	1-alkenyl,Phosphatidylcholine	-1.70967	0.00098989	0.0494011
HFD-DEN-Tumor_HFD-Veh-Liver	PI(18:0/18:2)	Phosphatidylinositol	1.20326	0.00095759	0.0494011
